# Supplementary material
Source: PubMed Central journal article supplement (PMC1755237)
Supplement: annrheumd_64_10_1467__1.pdf [file annrheumd_64_10_1467__1.pdf]

**Medial tibio-femoral joint space narrowing for women**

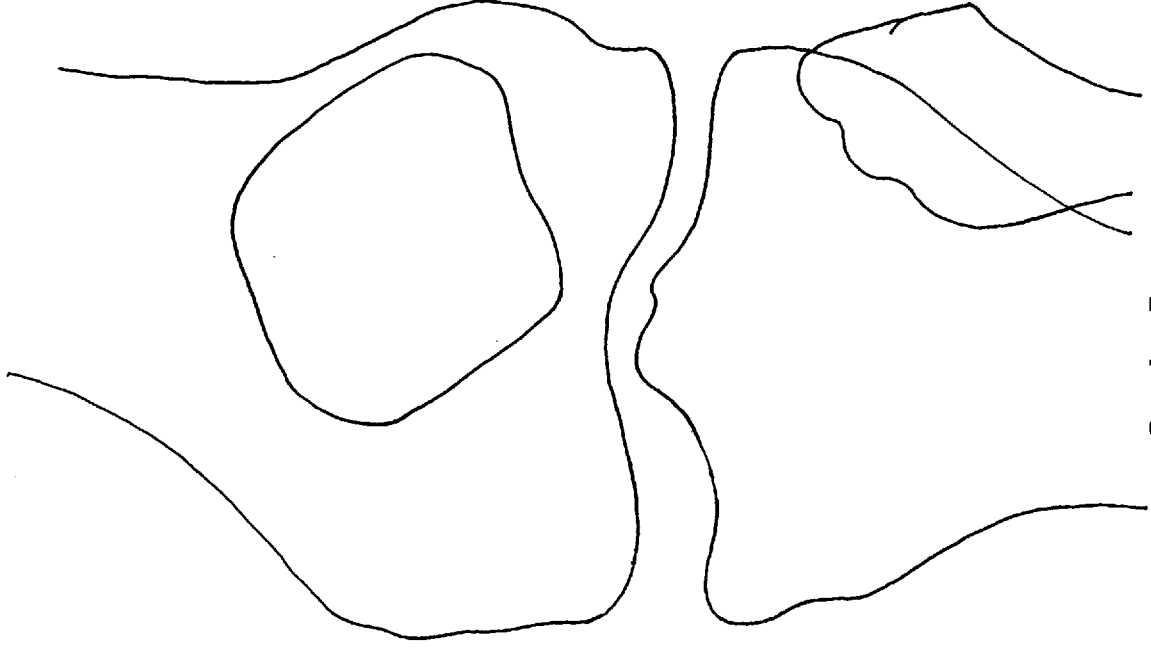

**Grade -5**

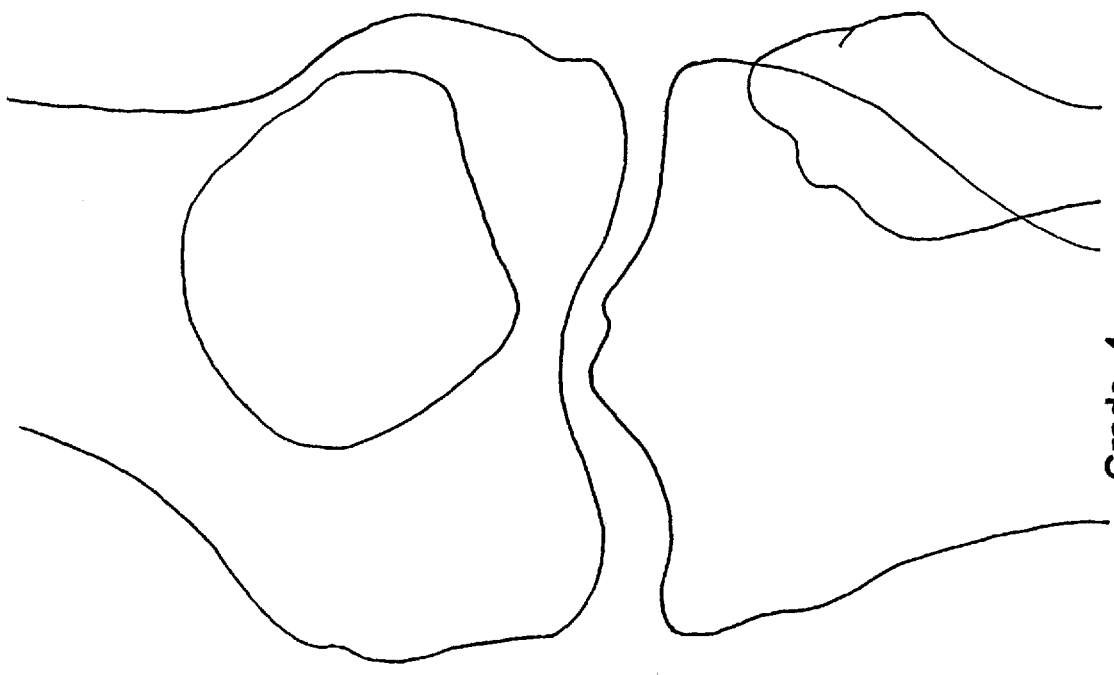

**Grade -4**

**Medial tibio-femoral joint space narrowing for women**

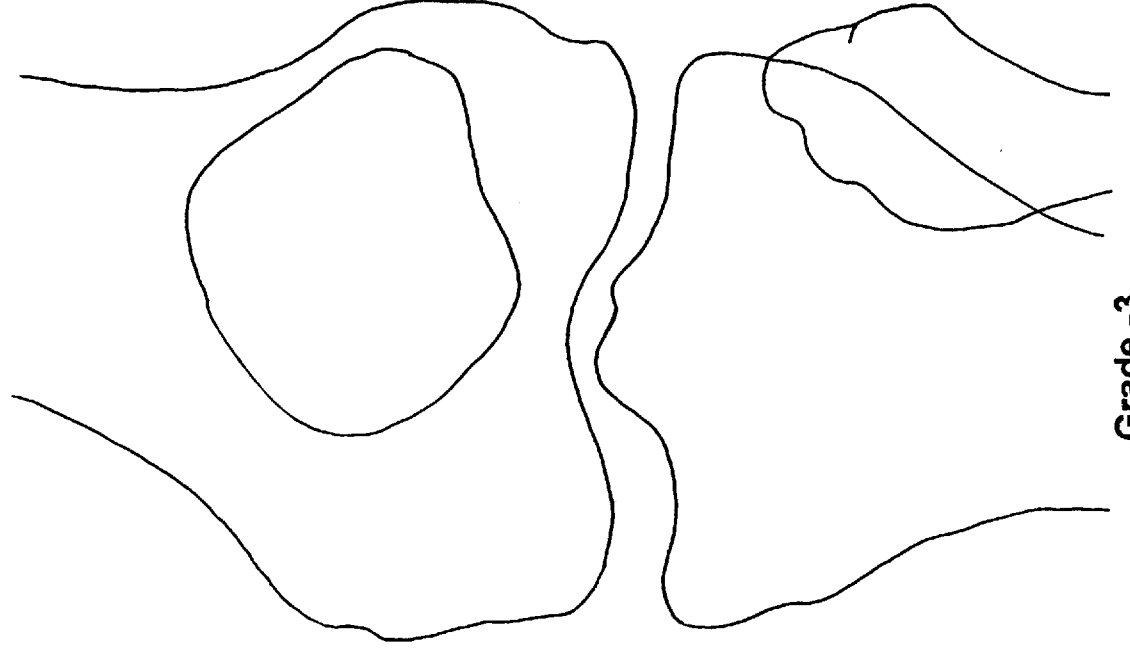

**Grade -3**

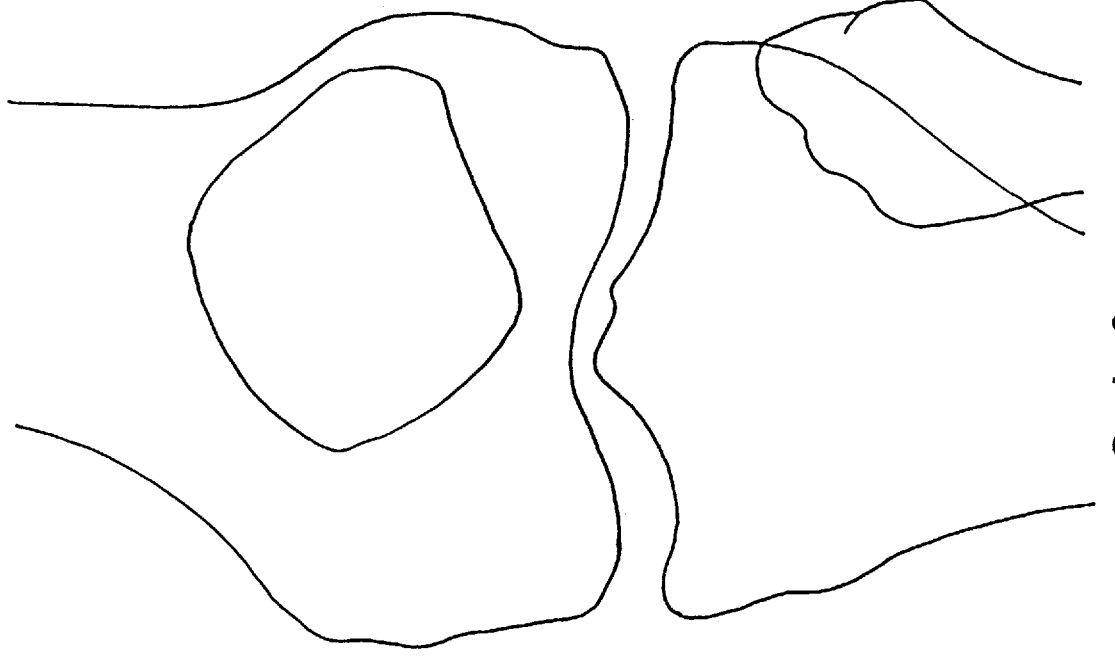

**Grade -2**

**Medial tibio-femoral joint space narrowing for women**

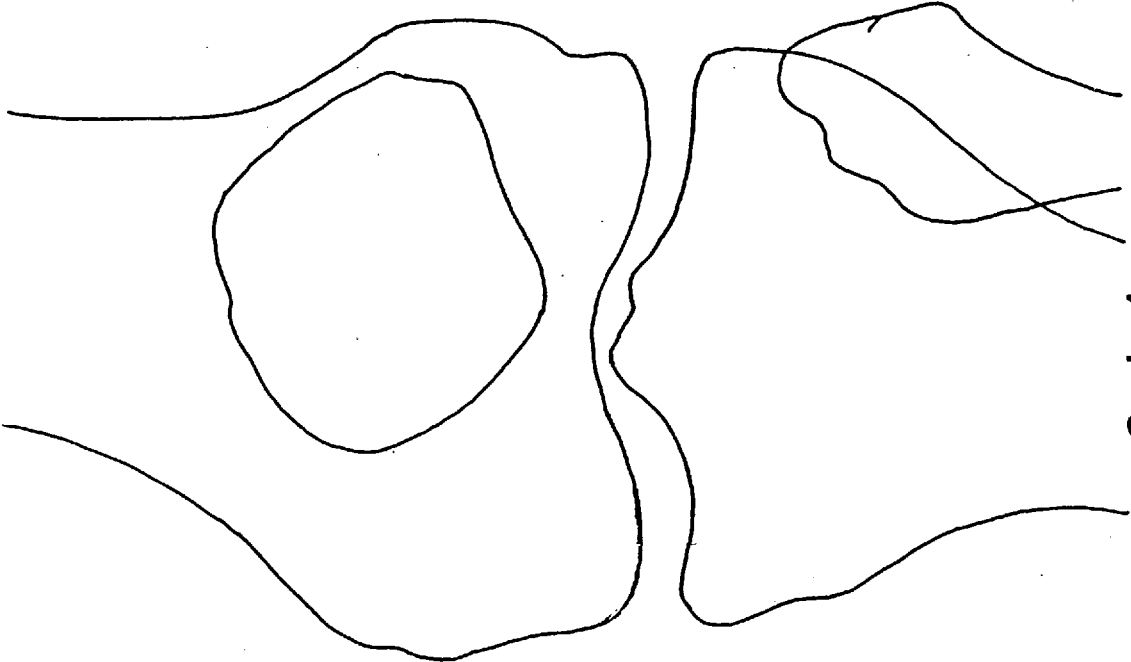

**Grade -1**

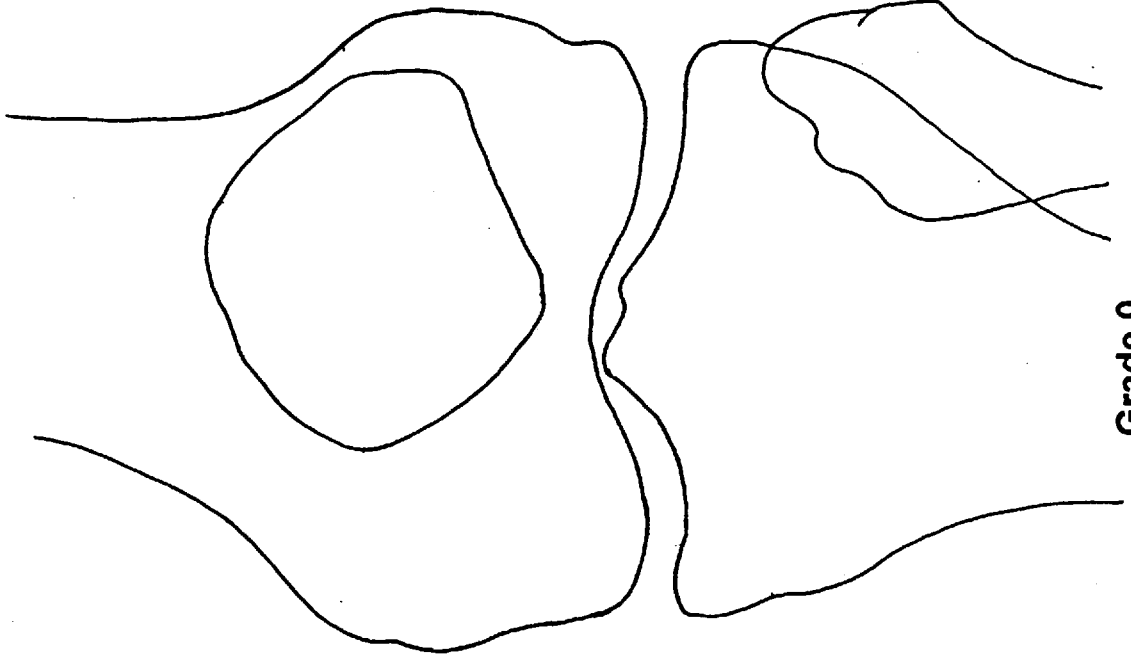

**Grade 0**

**Medial tibio-femoral joint space narrowing for women**

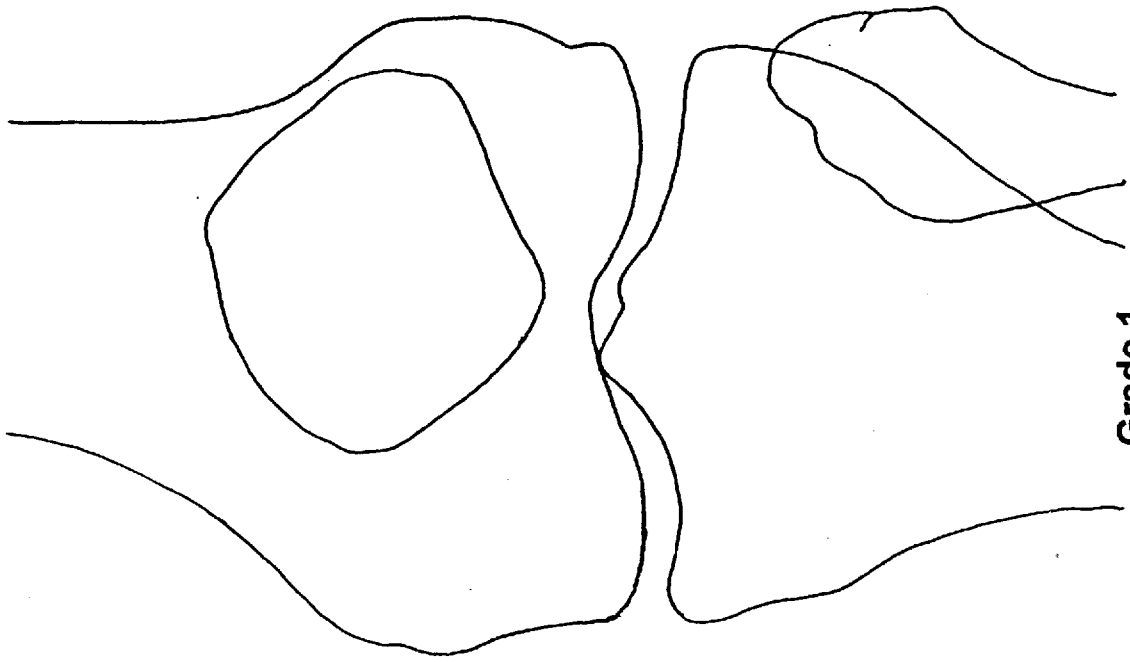

**Grade 1**

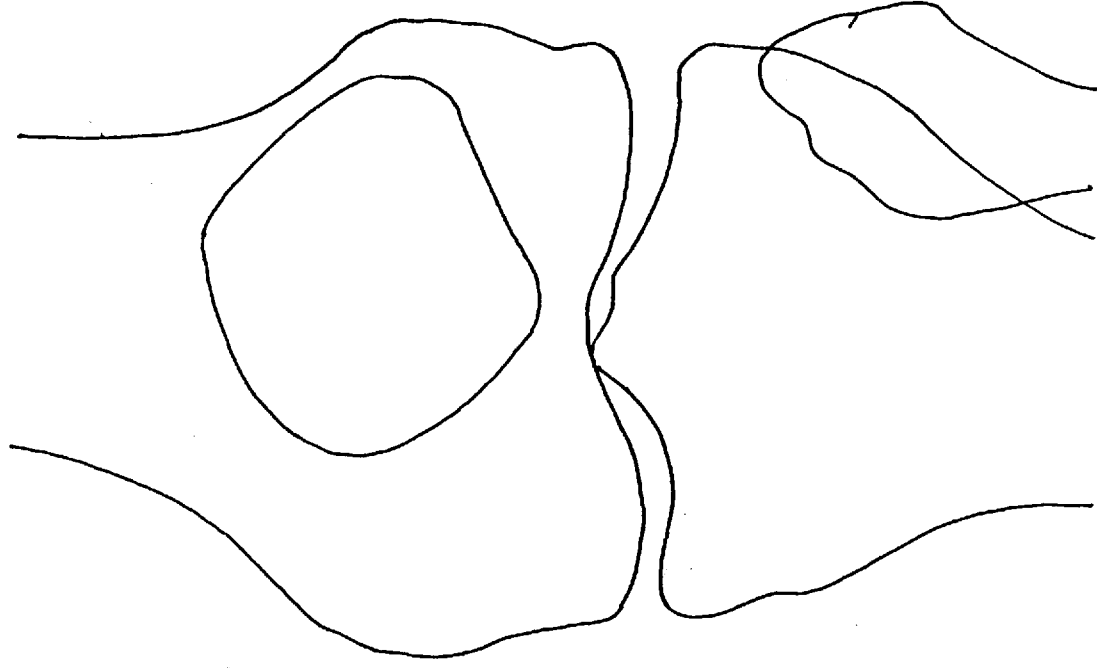

**Grade 2**

**Medial tibio-femoral joint space narrowing for women**

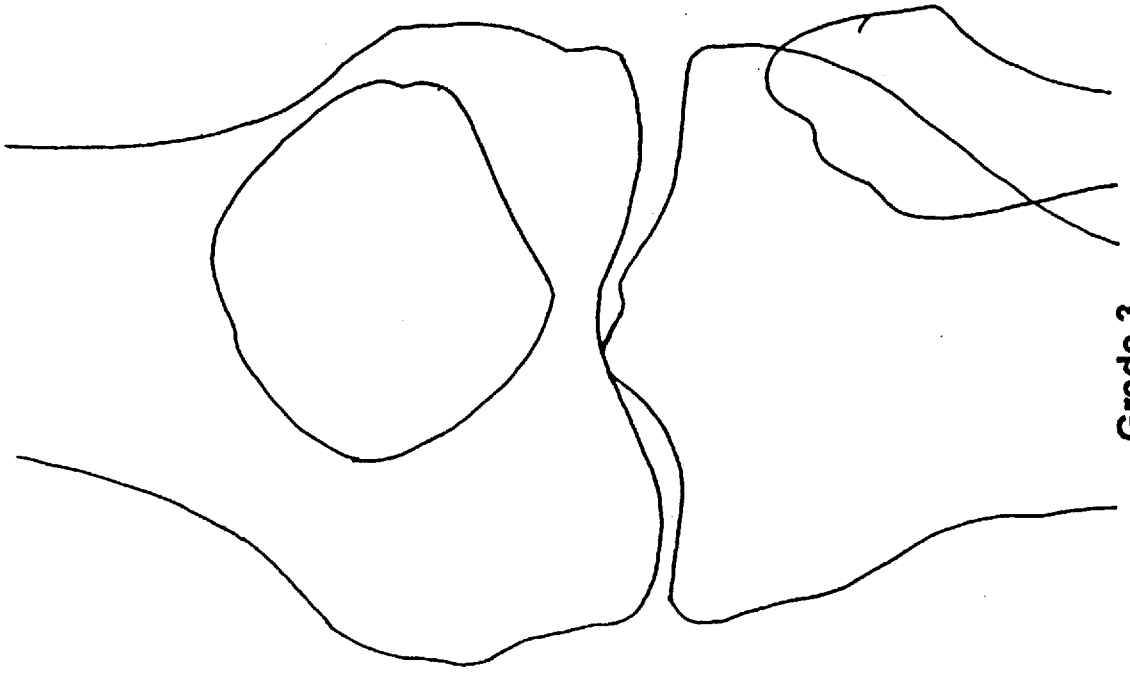

**Grade 3**

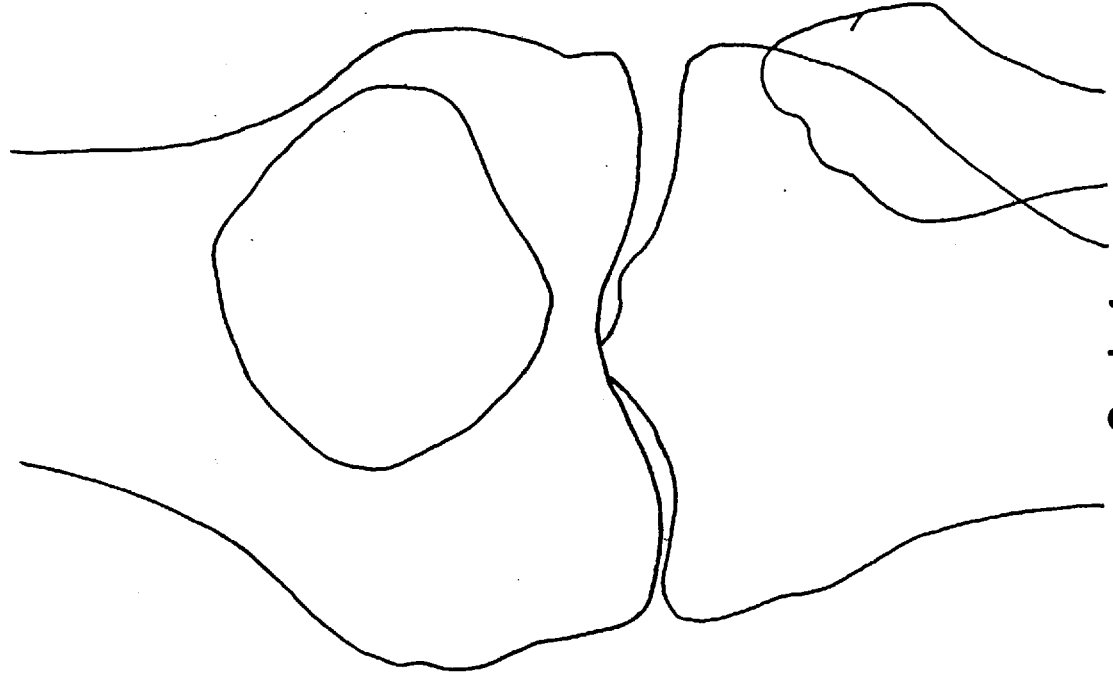

**Grade 4**

**Medial tibio-femoral joint space narrowing for women**

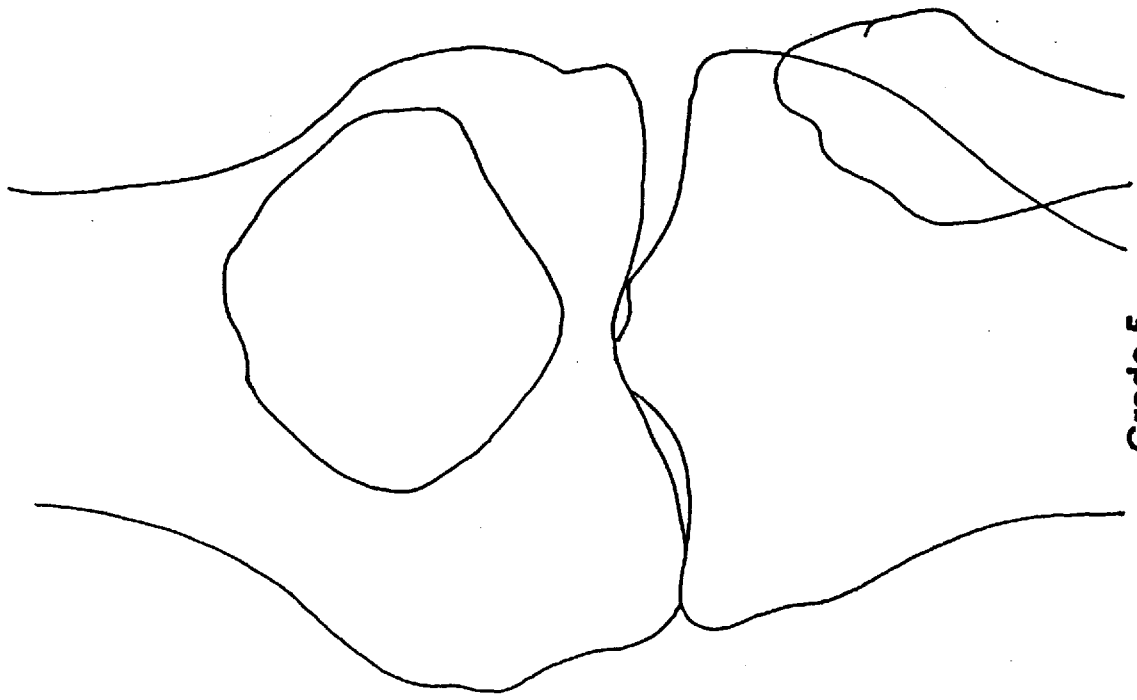

**Grade 5**

**Lateral tibio-femoral joint space narrowing for women**

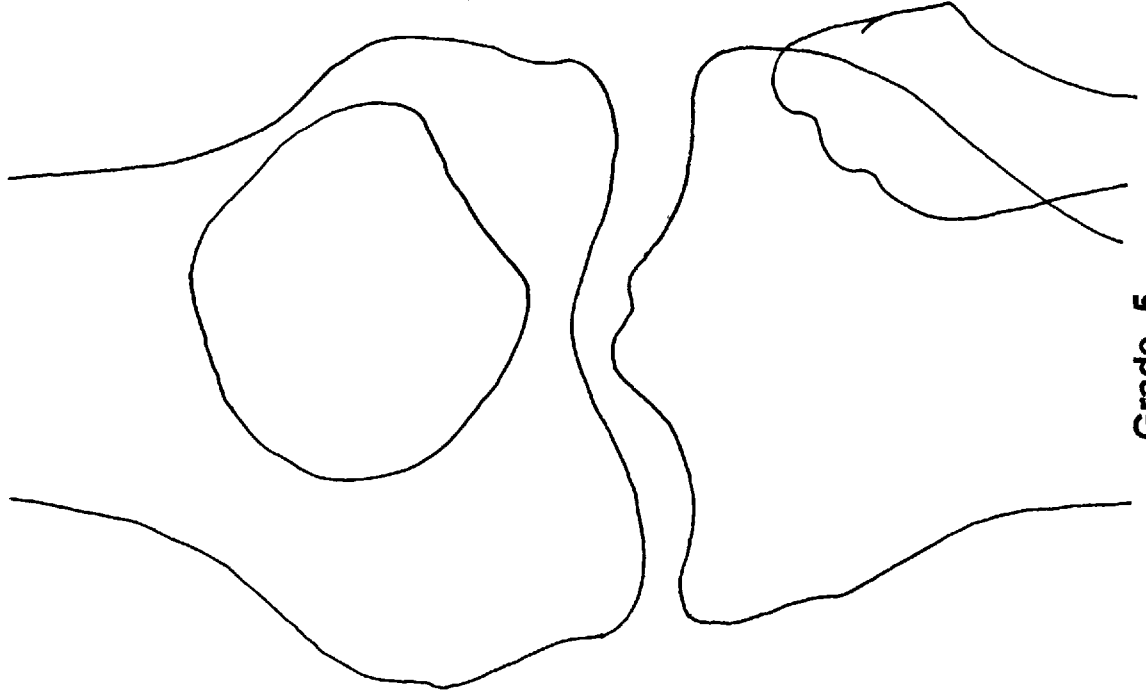

**Grade -5**

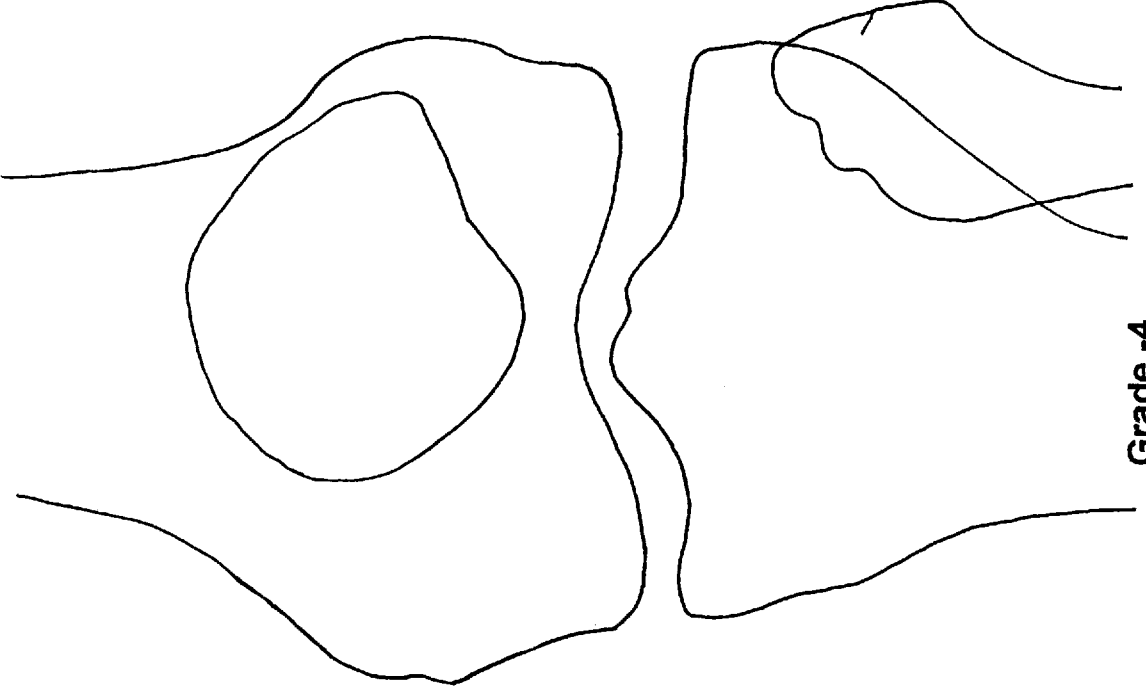

**Grade -4**

**Lateral tibio-femoral joint space narrowing for women**

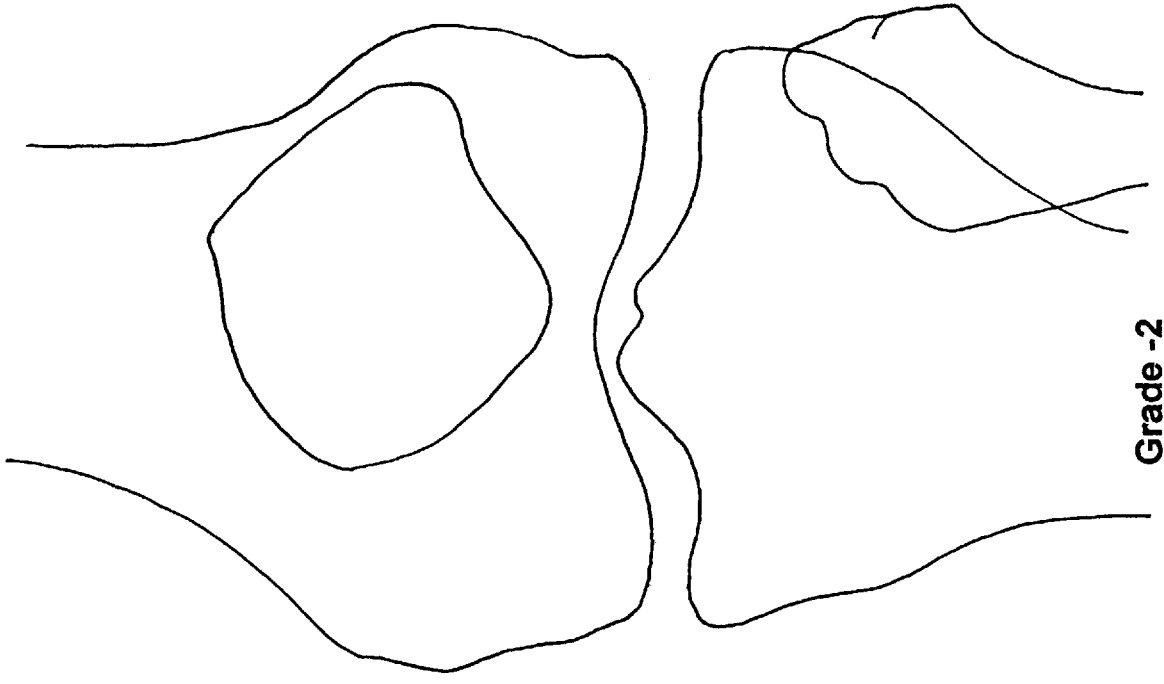

**Grade -2**

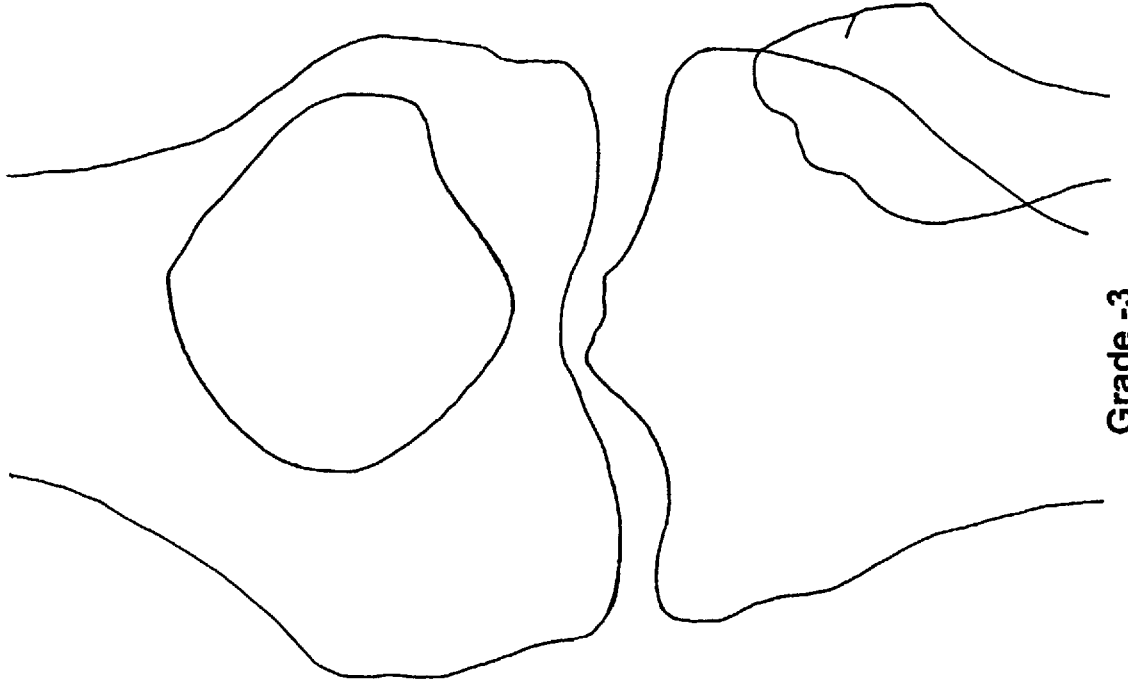

**Grade -3**



**Lateral tibio-femoral joint space narrowing for women**

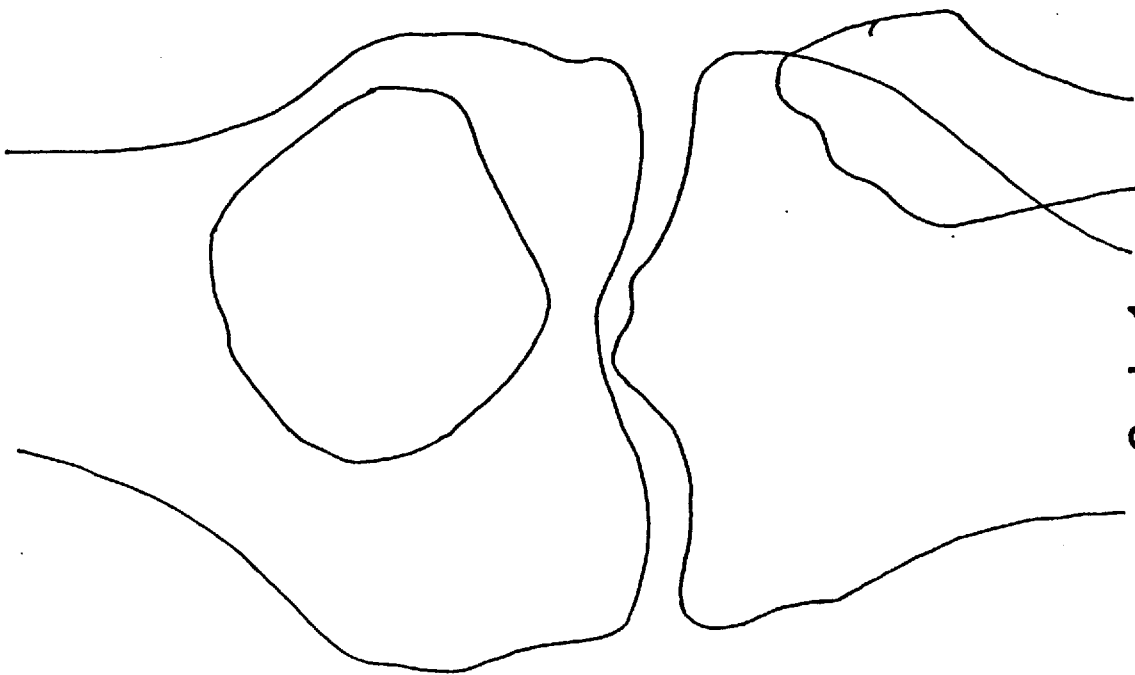

**Grade -1**

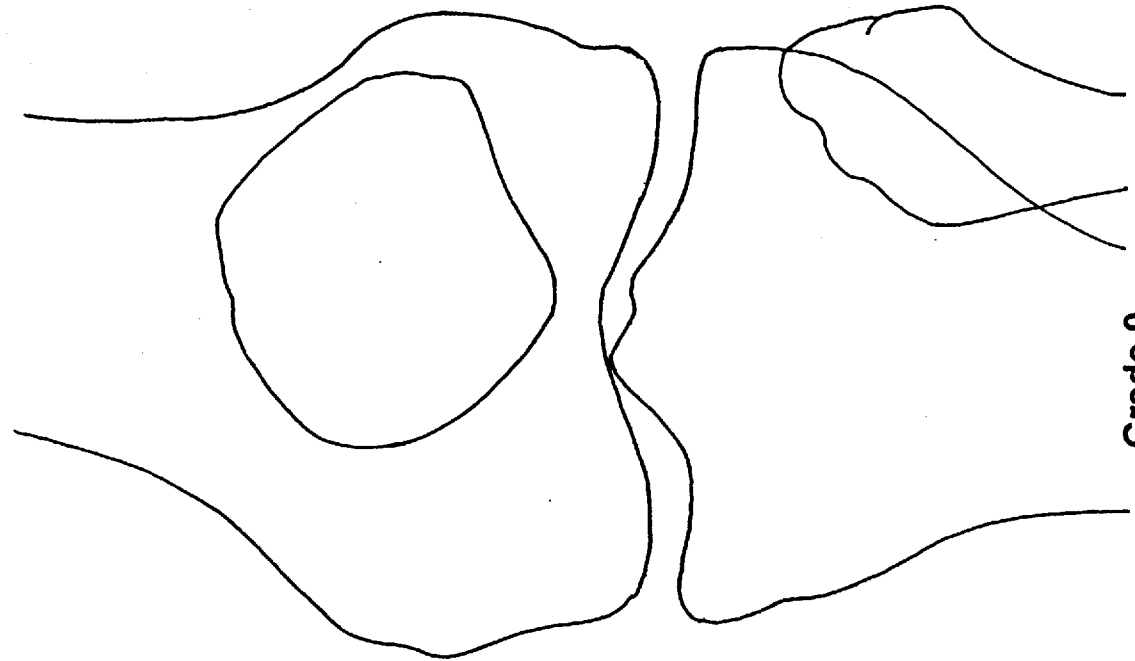

**Grade 0**

**Lateral tibio-femoral joint space narrowing for women**

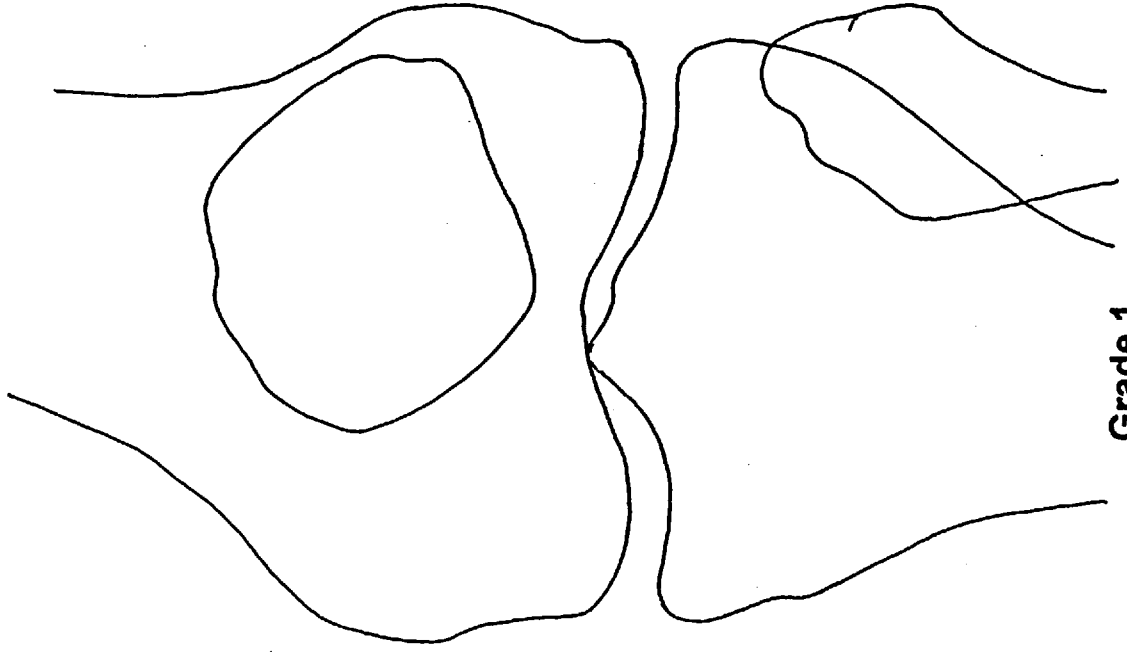

**Grade 1**

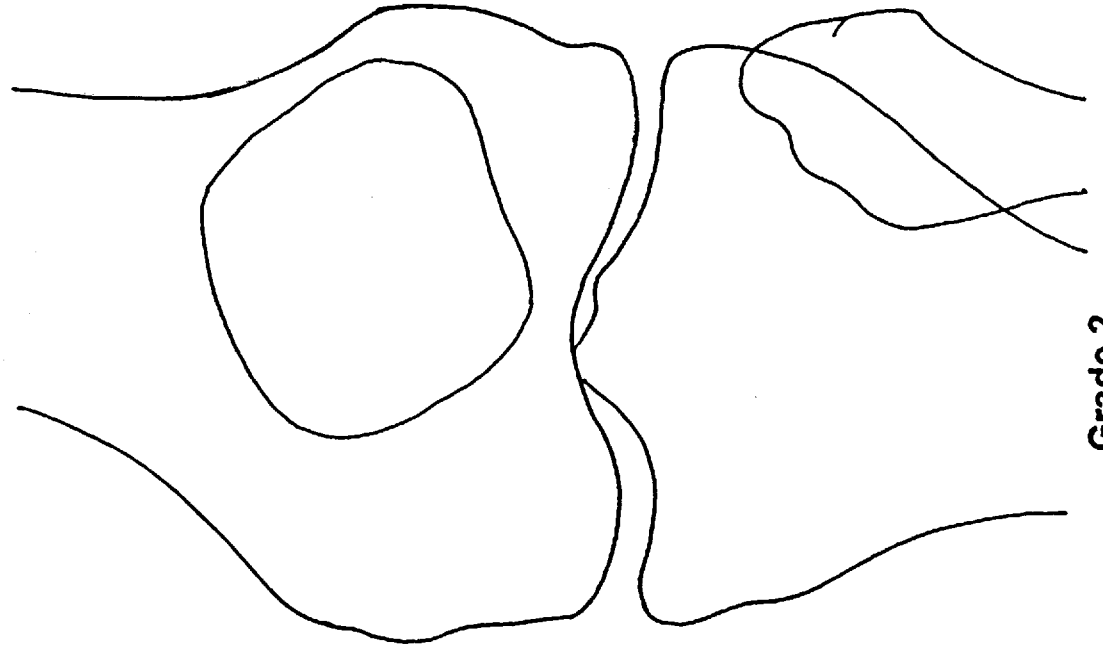

**Grade 2**

**Lateral tibio-femoral joint space narrowing for women**

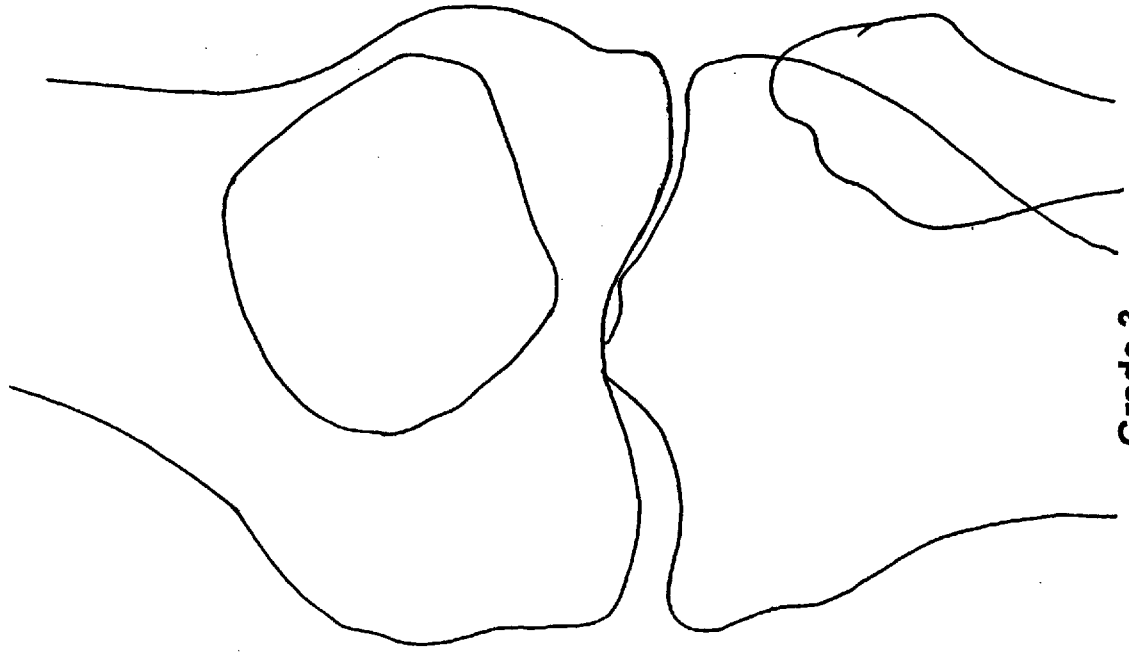

**Grade 3**

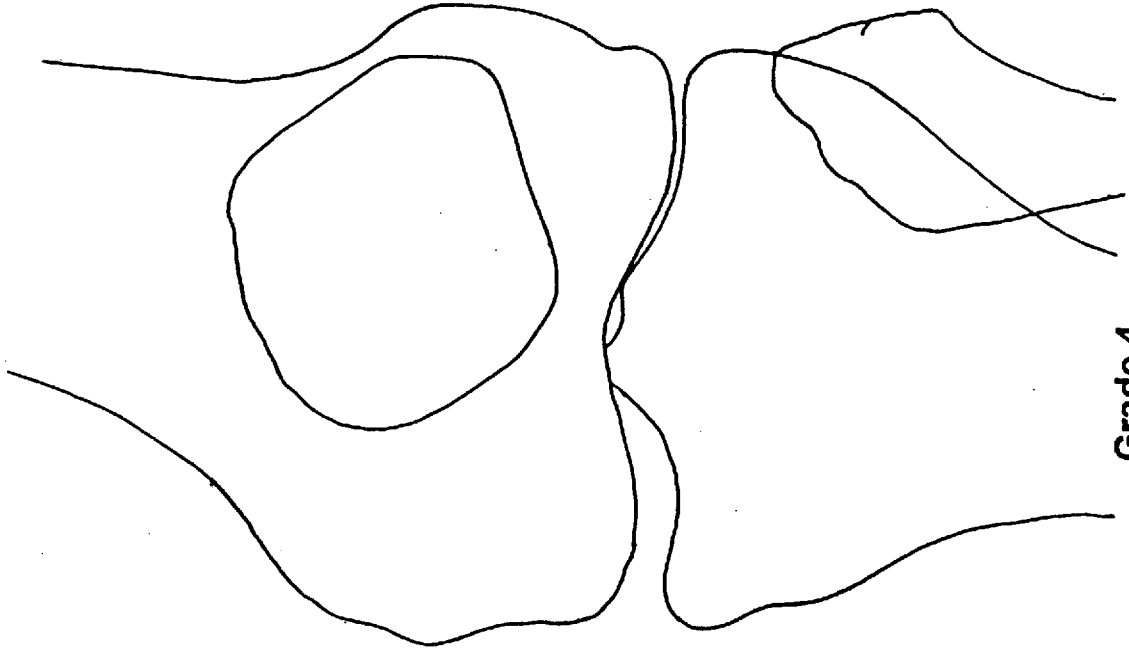

**Grade 4**

**Lateral tibio-femoral joint space narrowing for women**

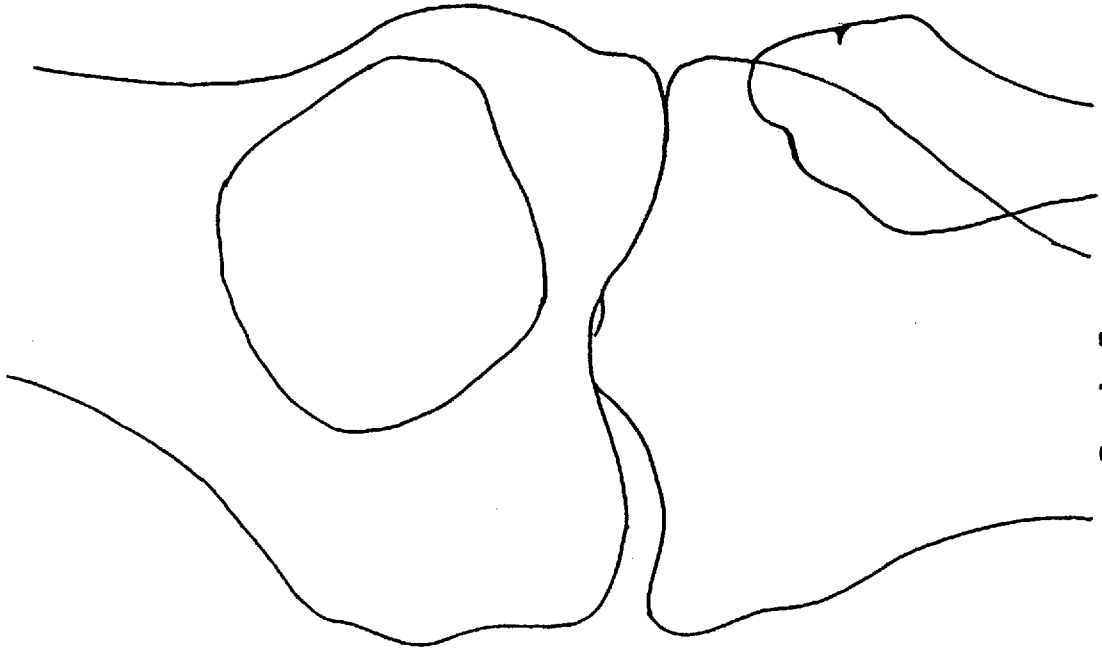

**Grade 5**

**Osteophytes in all tibio-femoral sites**

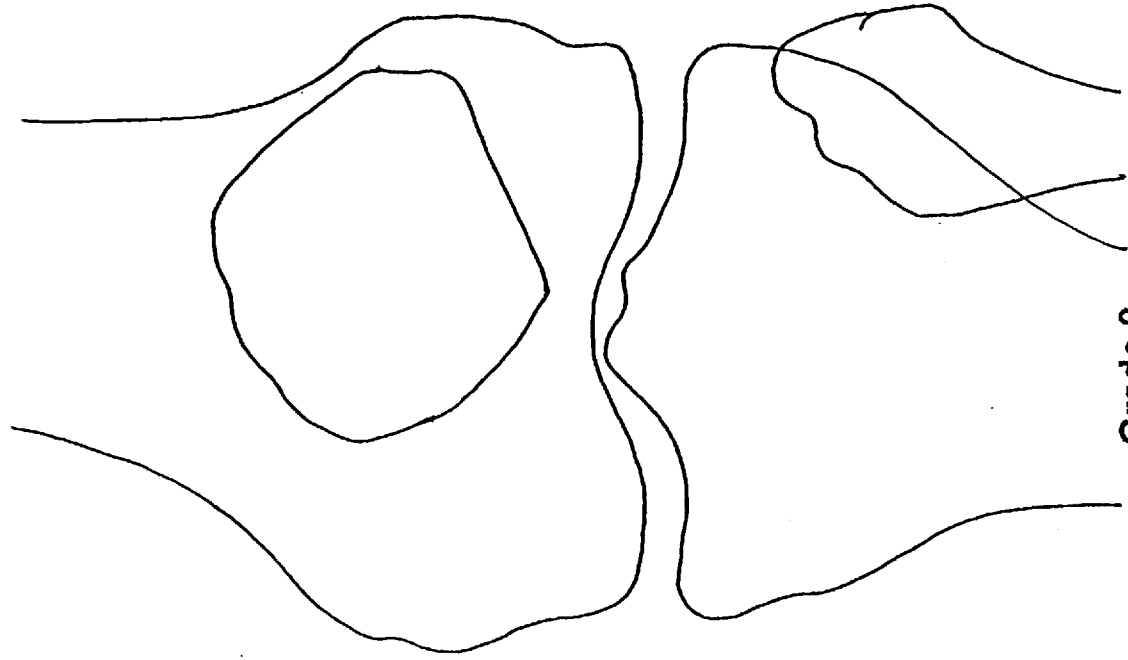

**Grade 0**

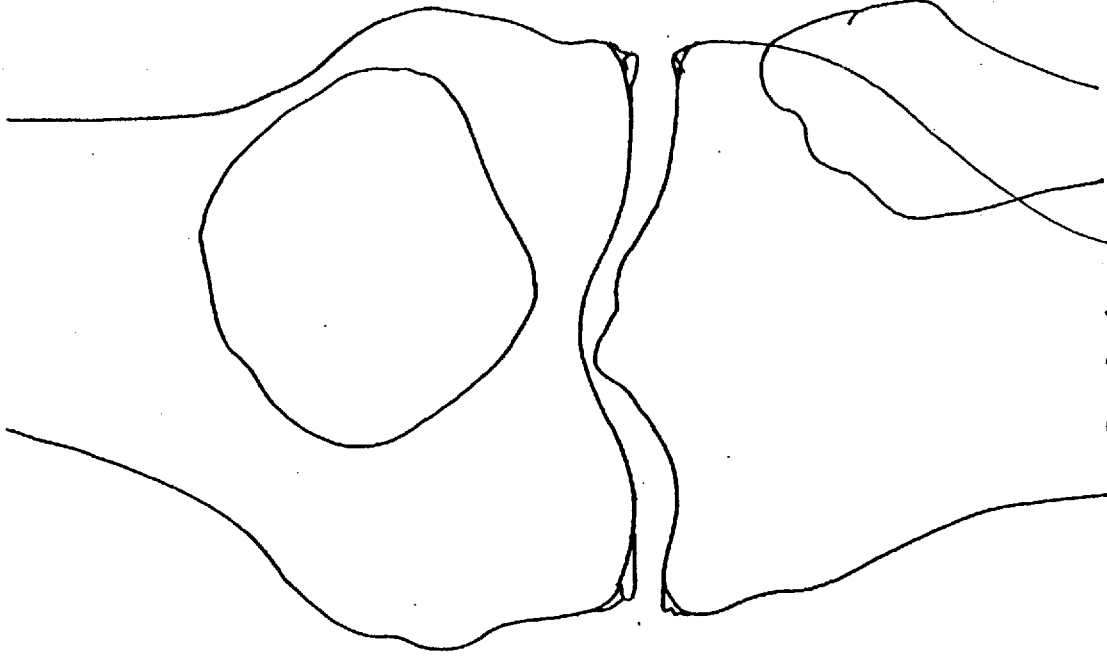

**Grade 1**

**Osteophytes in tibio-femoral sites**

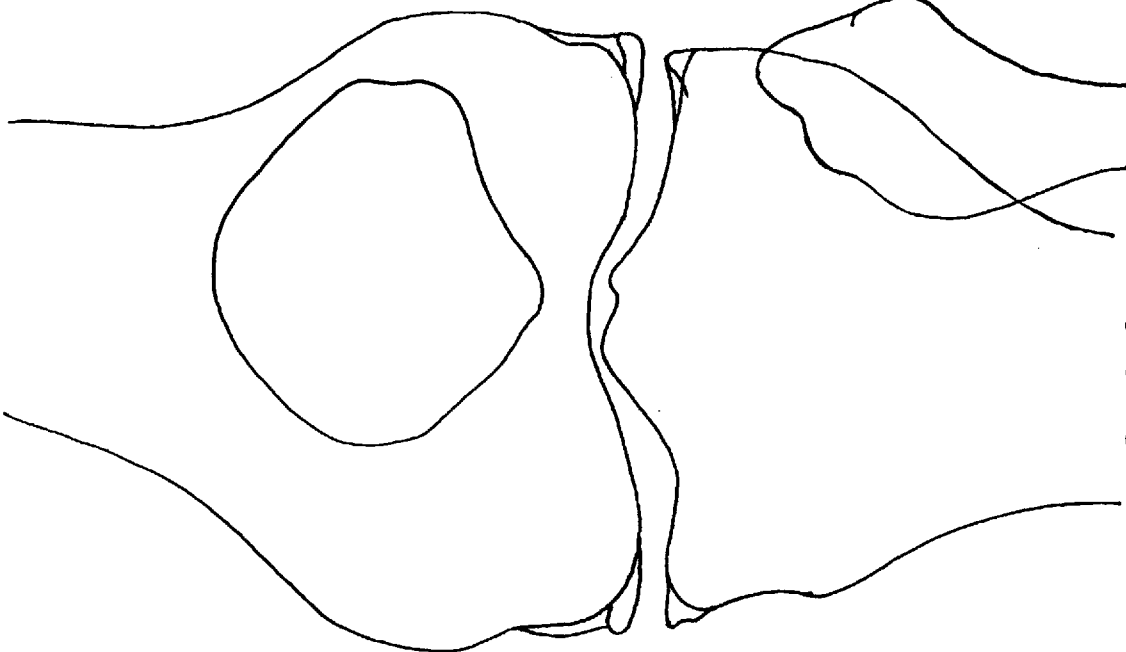

**Grade 2**

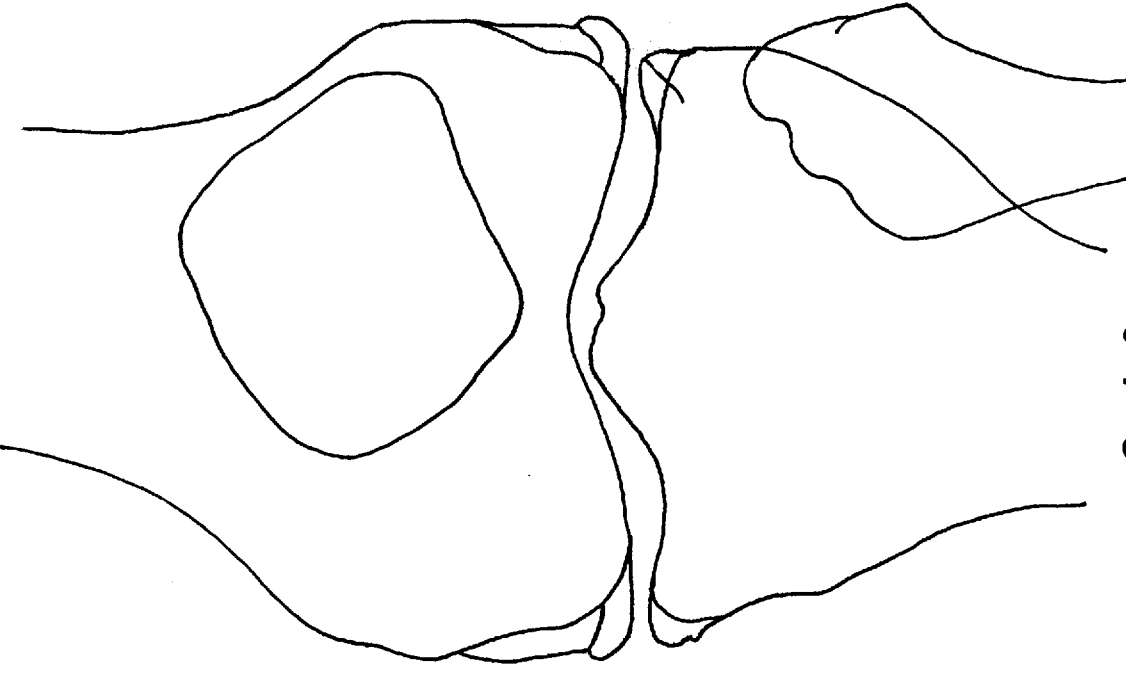

**Grade 3**

**Osteophytes in all tibio-femoral sites**

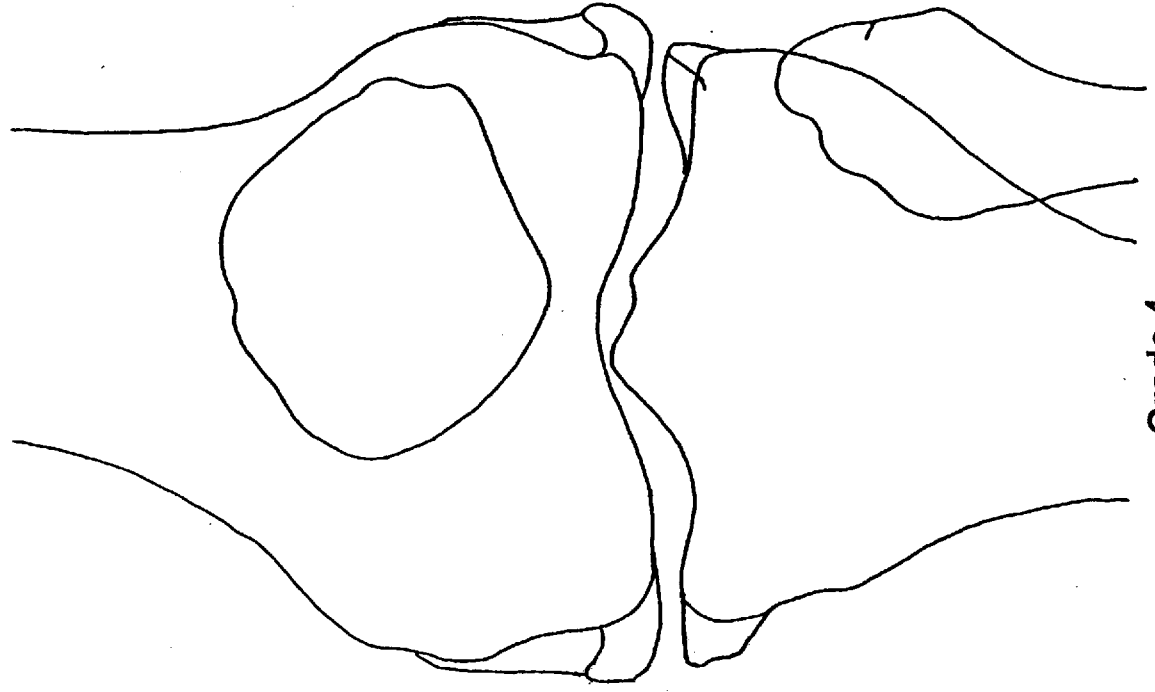

**Grade 4**

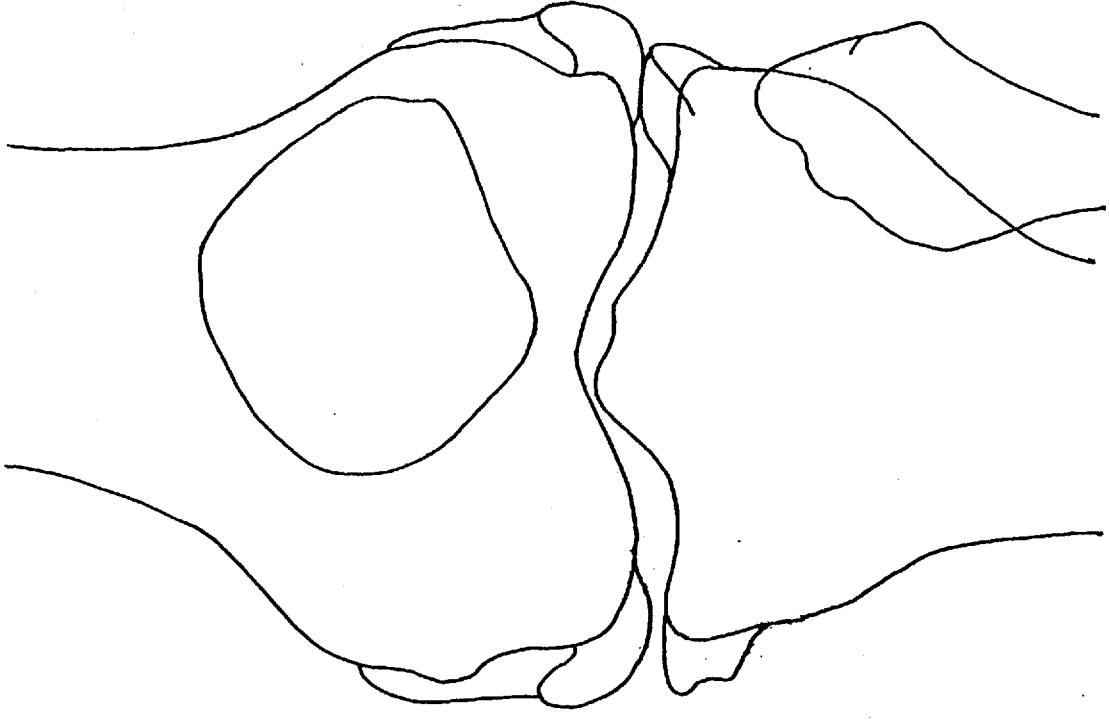

**Grade 5**

**Lateral tibial osteophyte (optional shape)**

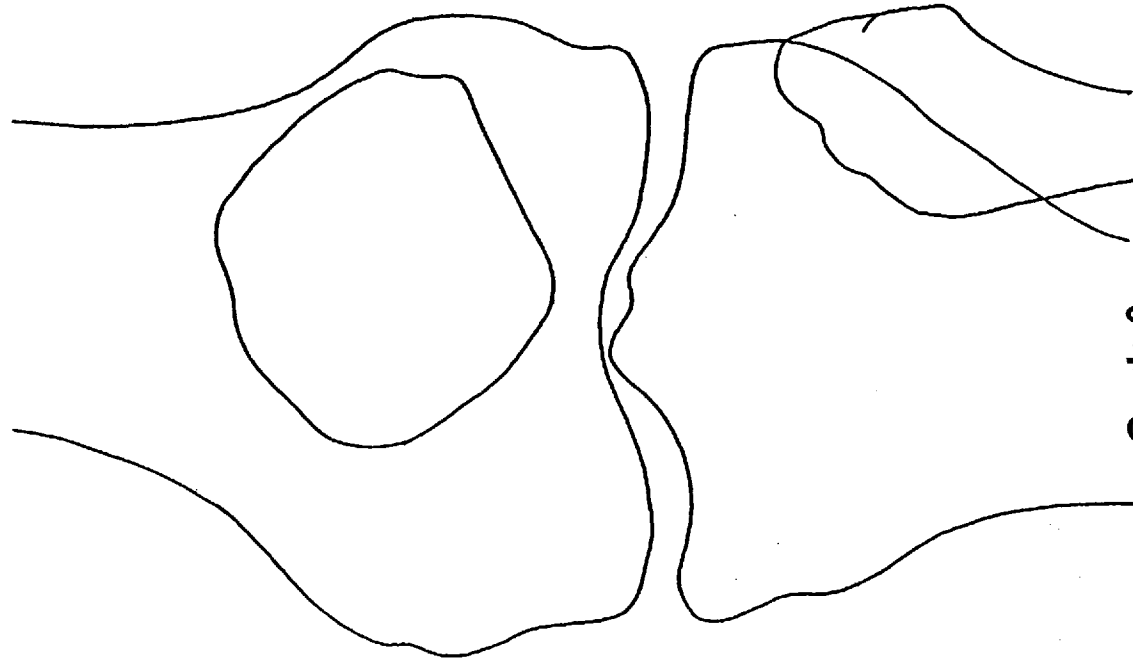

**Grade 0**

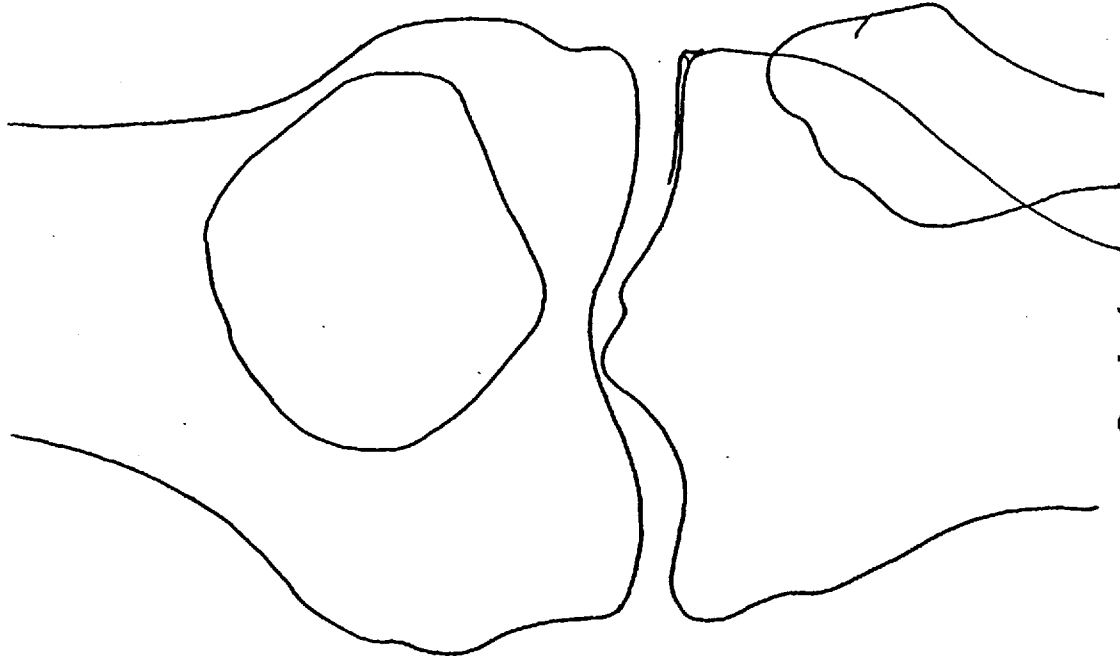

**Grade 1**



**Lateral tibial osteophyte (optional shape)**

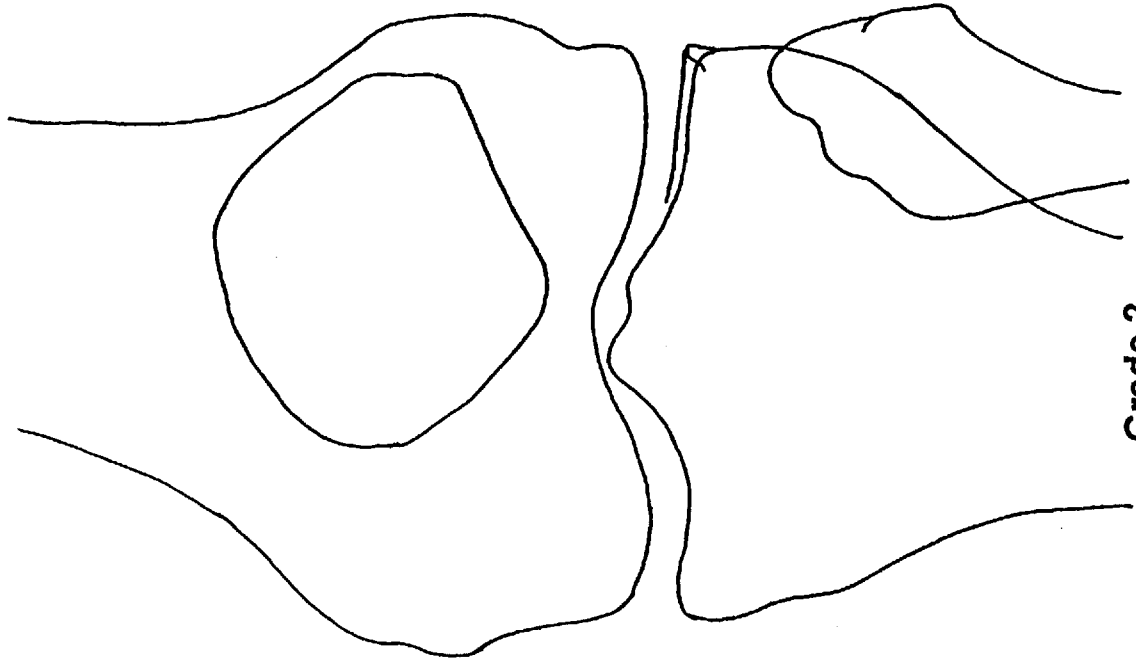

**Grade 2**

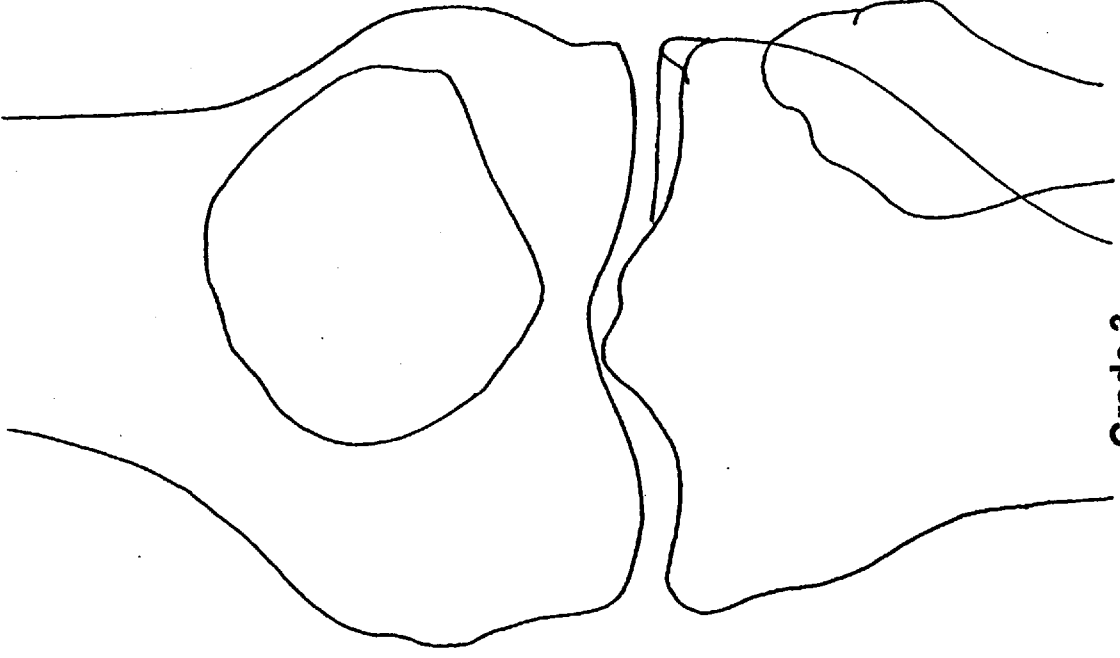

**Grade 3**

**Lateral tibial osteophyte (optional shape)**

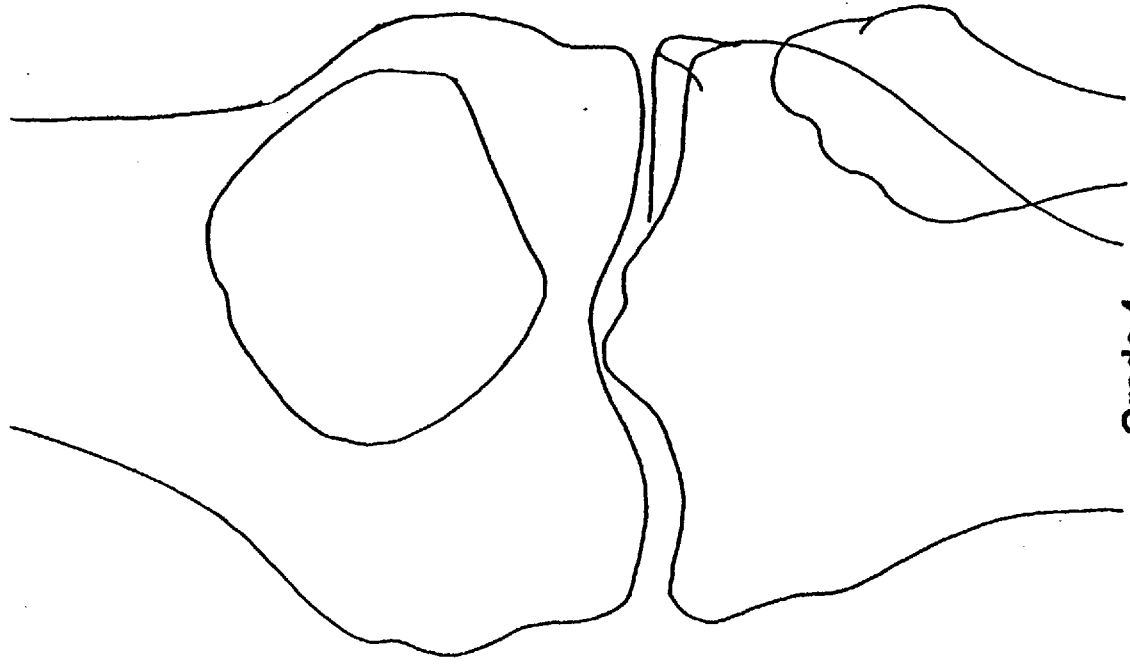

**Grade 4**

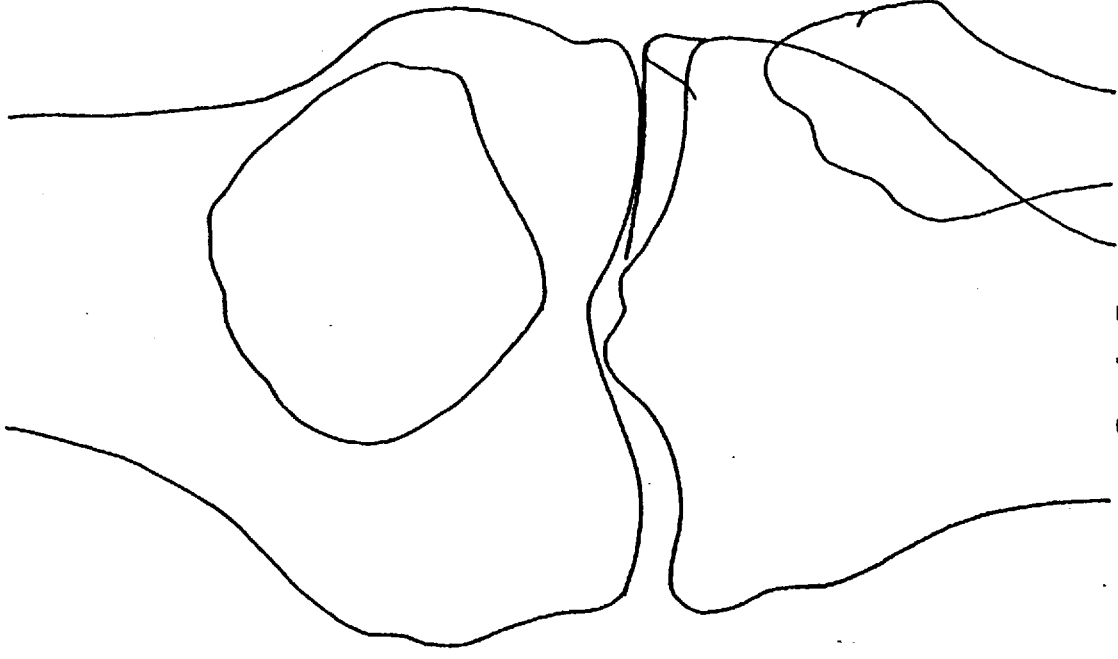

**Grade 5**

**Medial patello-femoral joint space narrowing for women**

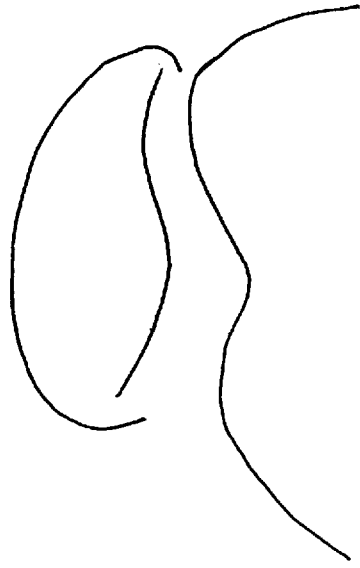

**Grade -5**

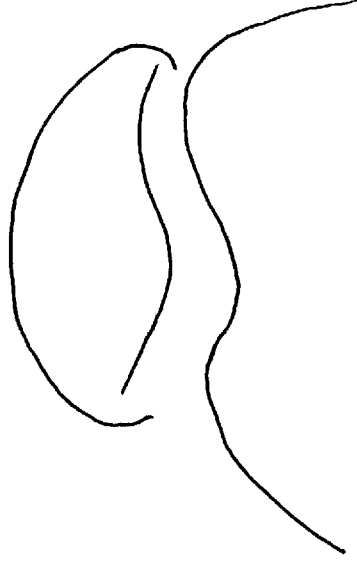

**Grade -4**

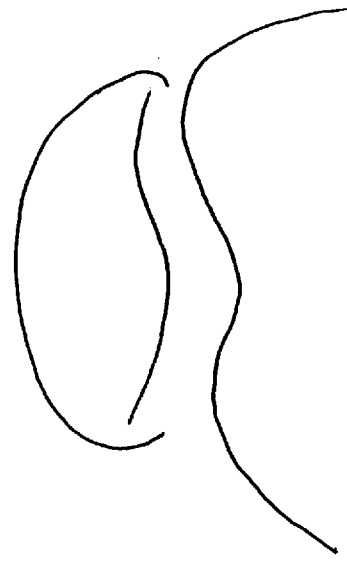

**Grade -3**

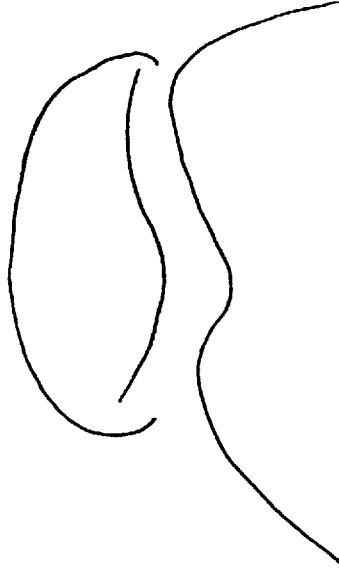

**Grade -2**

**Medial patello-femoral joint space narrowing for women**

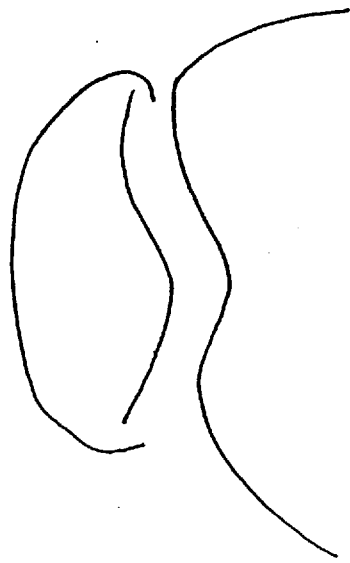

**Grade -1**

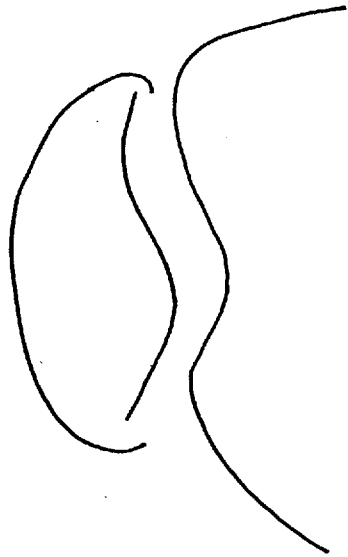

**Grade 0**

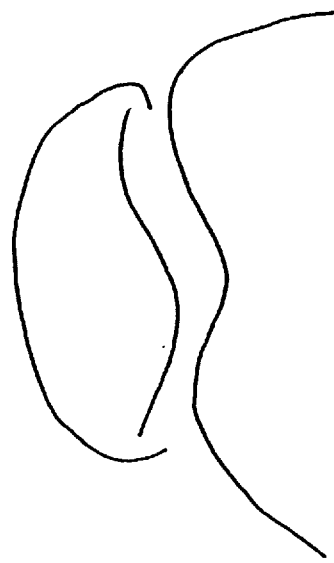

**Grade 1**

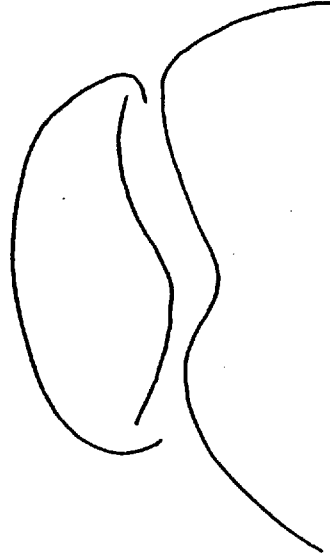

**Grade 2**

**Medial patello-femoral joint space narrowing for women**

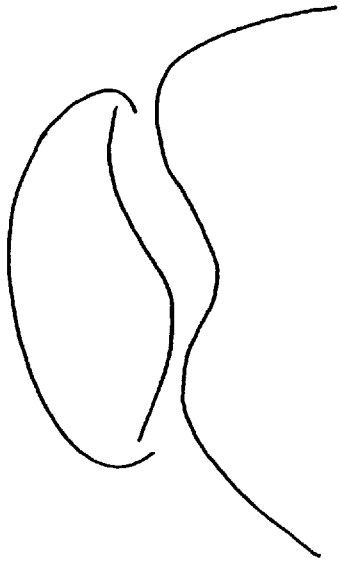

**Grade 3**

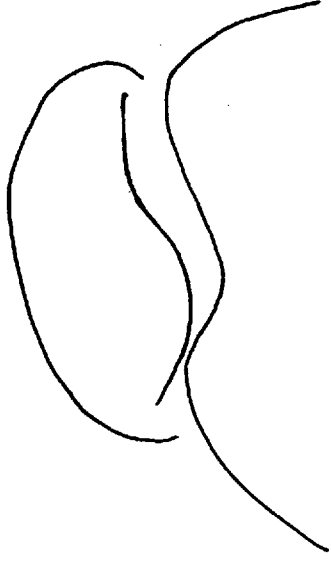

**Grade 4**

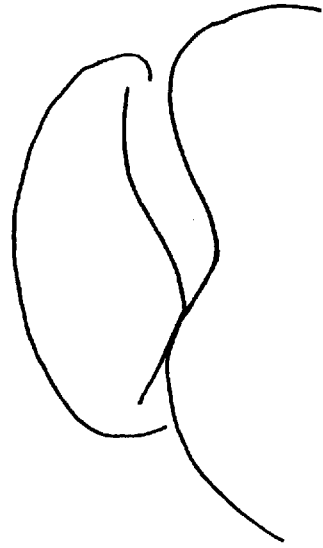

**Grade 5**

**Lateral patello-femoral joint space narrowing for women**

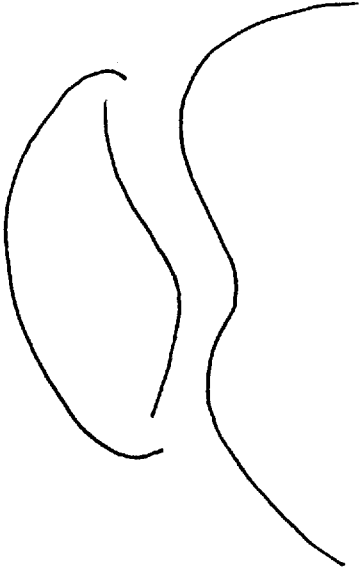

**Grade -5**

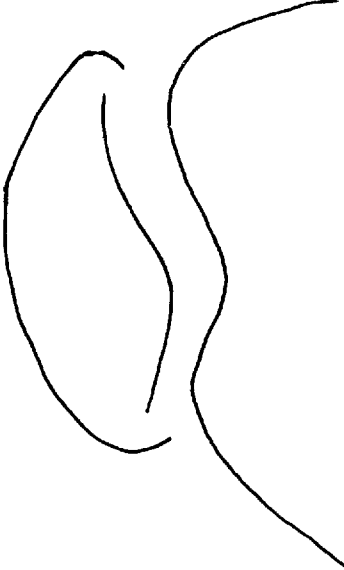

**Grade -4**

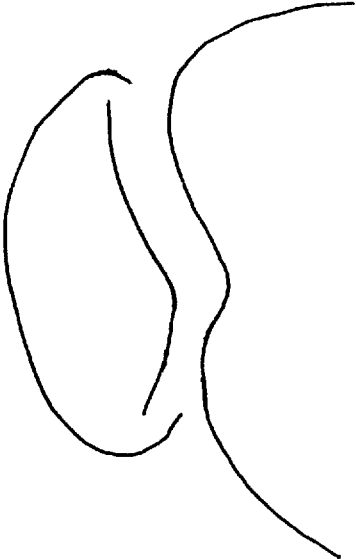

**Grade -3**

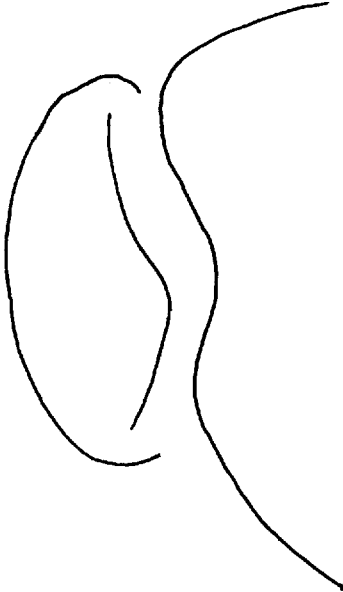

**Grade -2**

**Lateral patello-femoral joint space narrowing for women**

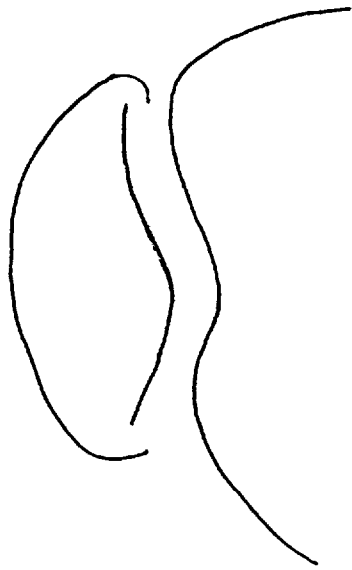

**Grade -1**

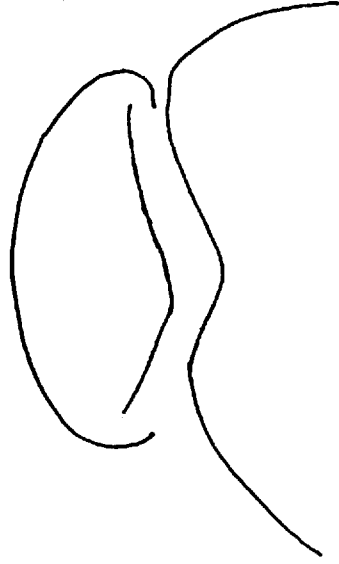

**Grade 0**

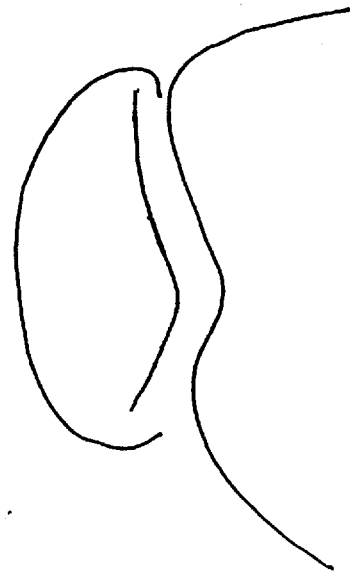

**Grade 1**

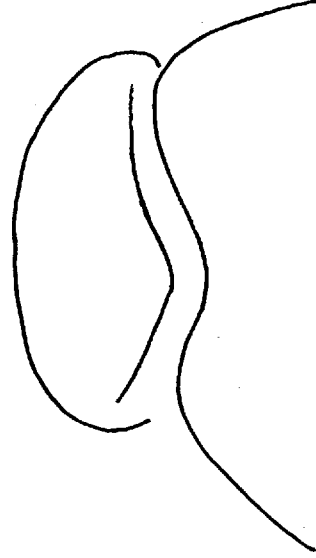

**Grade 2**

**Lateral patello-femoral joint space narrowing for women**

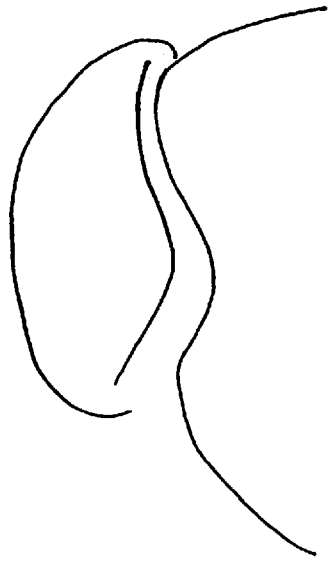

**Grade 3**

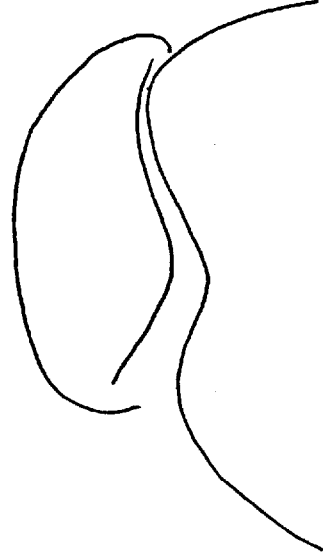

**Grade 4**

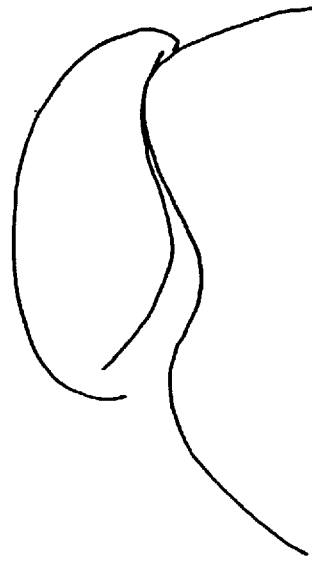

**Grade 5**



**Osteophytes in all patello-femoral sites**

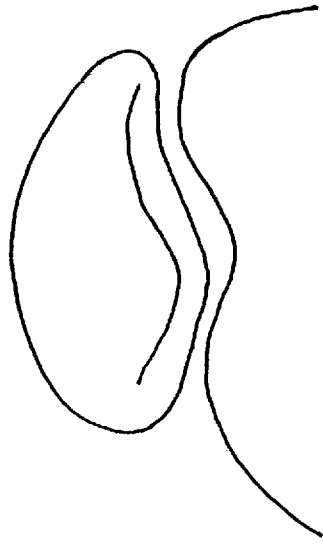

**Grade 0**

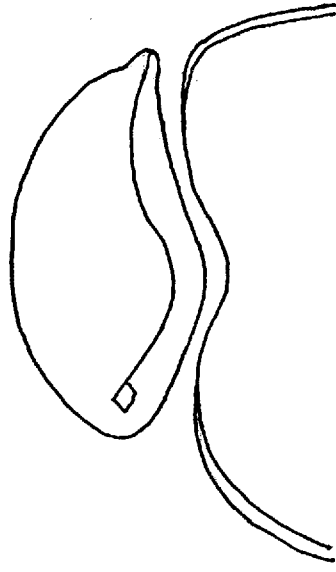

**Grade 1**

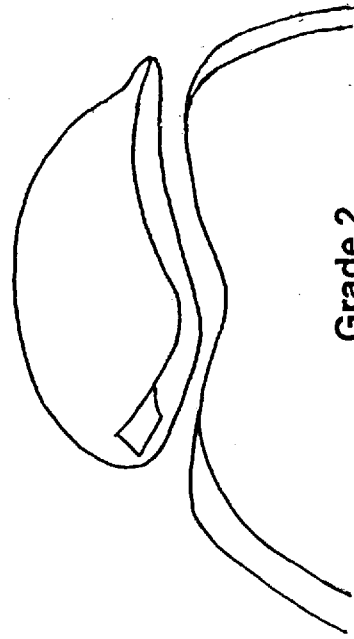

**Grade 2**

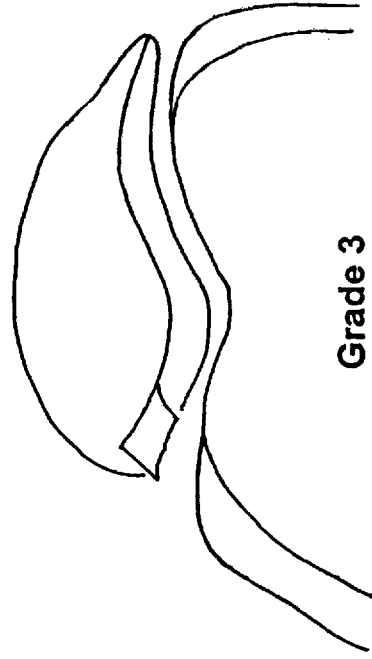

**Grade 3**

**Osteophytes in all patello-femoral sites**

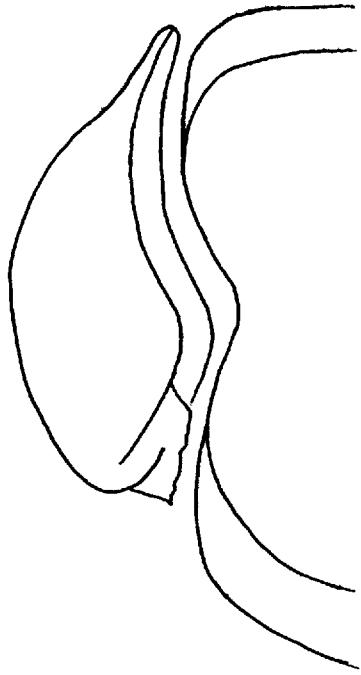

**Grade 4**

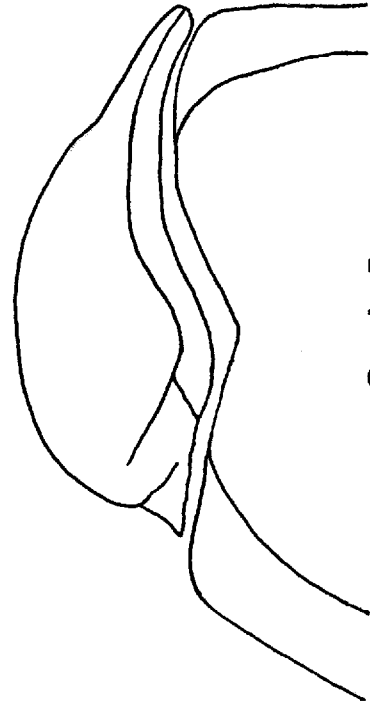

**Grade 5**

**Medial femoral trochlear osteophyte (optional shape)**

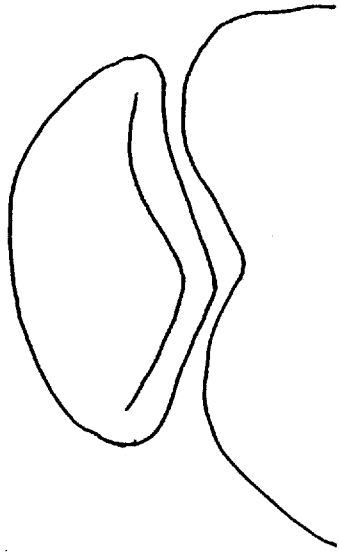

**Grade 0**

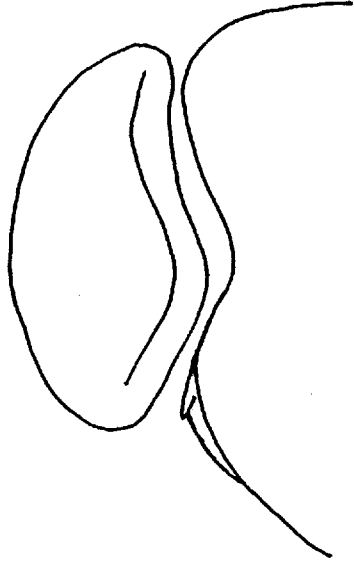

**Grade 1**

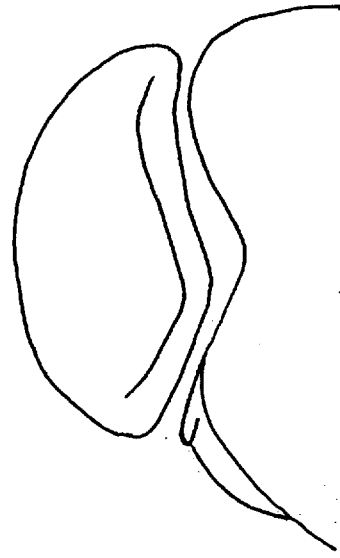

**Grade 2**

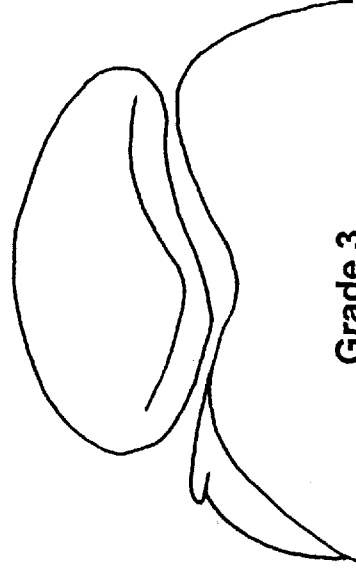

**Grade 3**

**Medial femoral trochlear osteophyte (optional shape)**

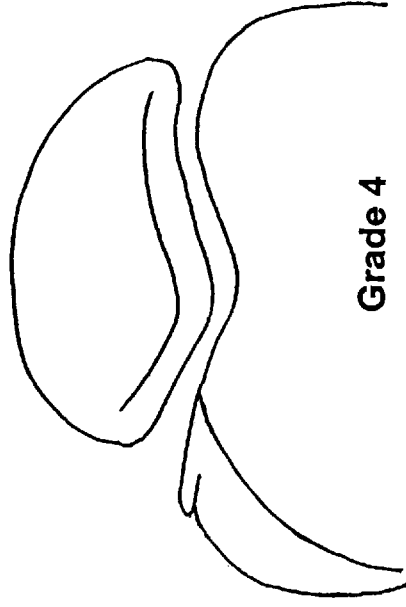

**Grade 4**

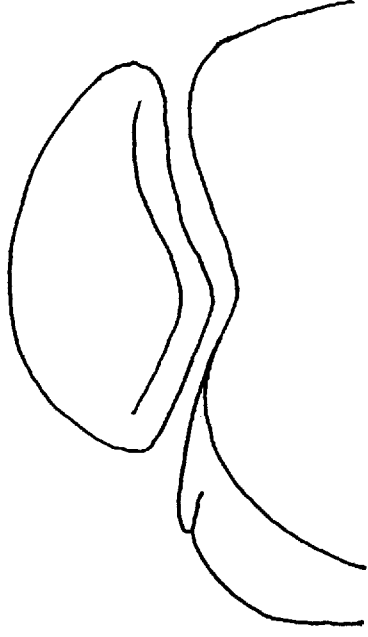

**Grade 5**

**Medial tibio-femoral joint space narrowing for men**

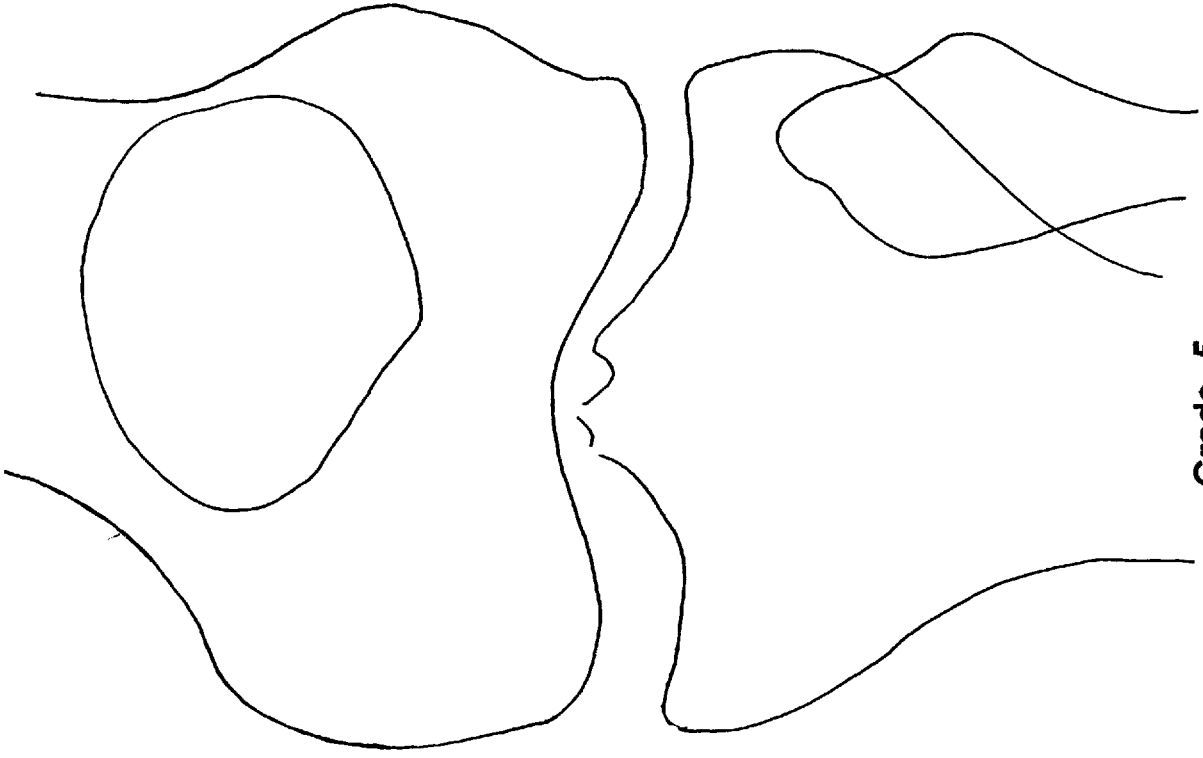

**Grade -5**

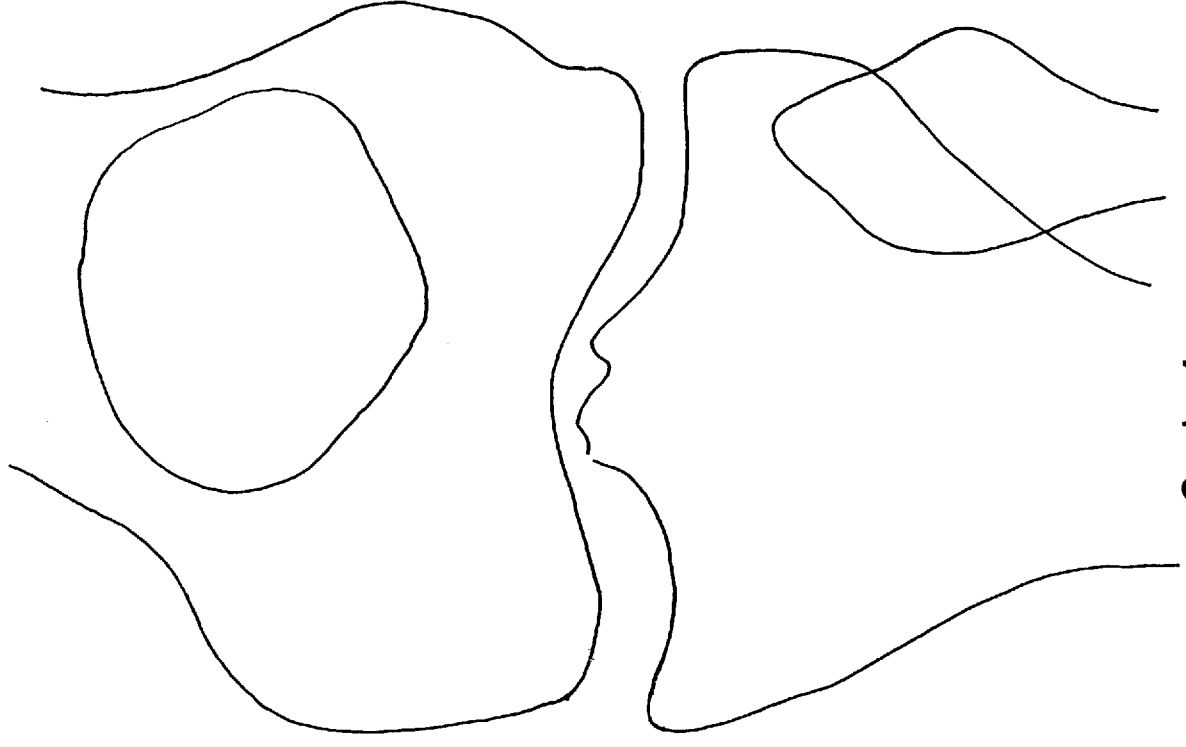

**Grade -4**

**Medial tibio-femoral joint space narrowing for men**

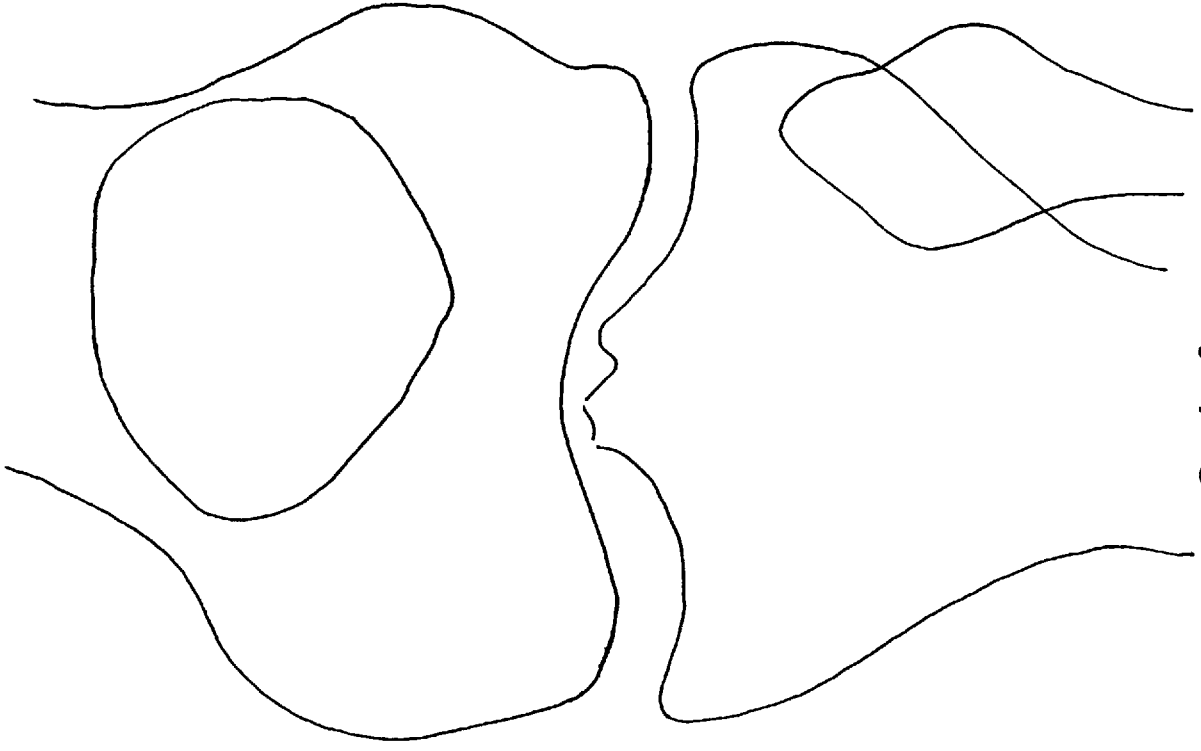

**Grade -3**

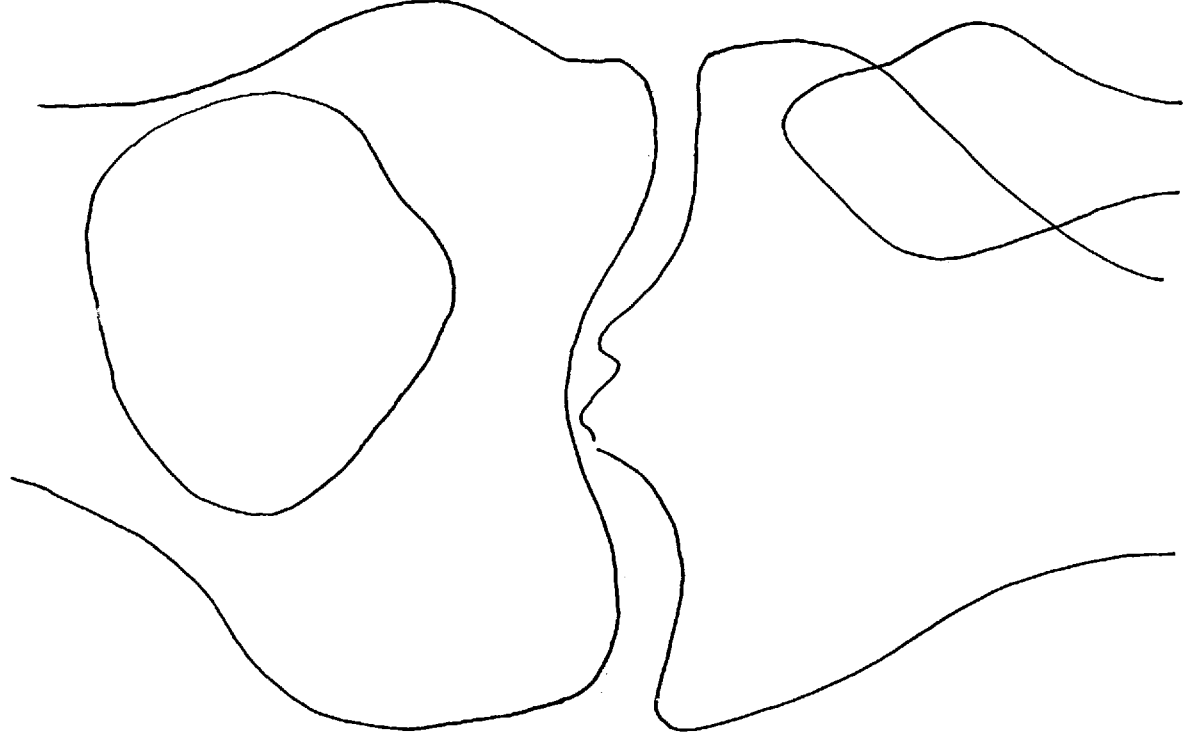

**Grade -2**

**Medial tibio-femoral joint space narrowing for men**

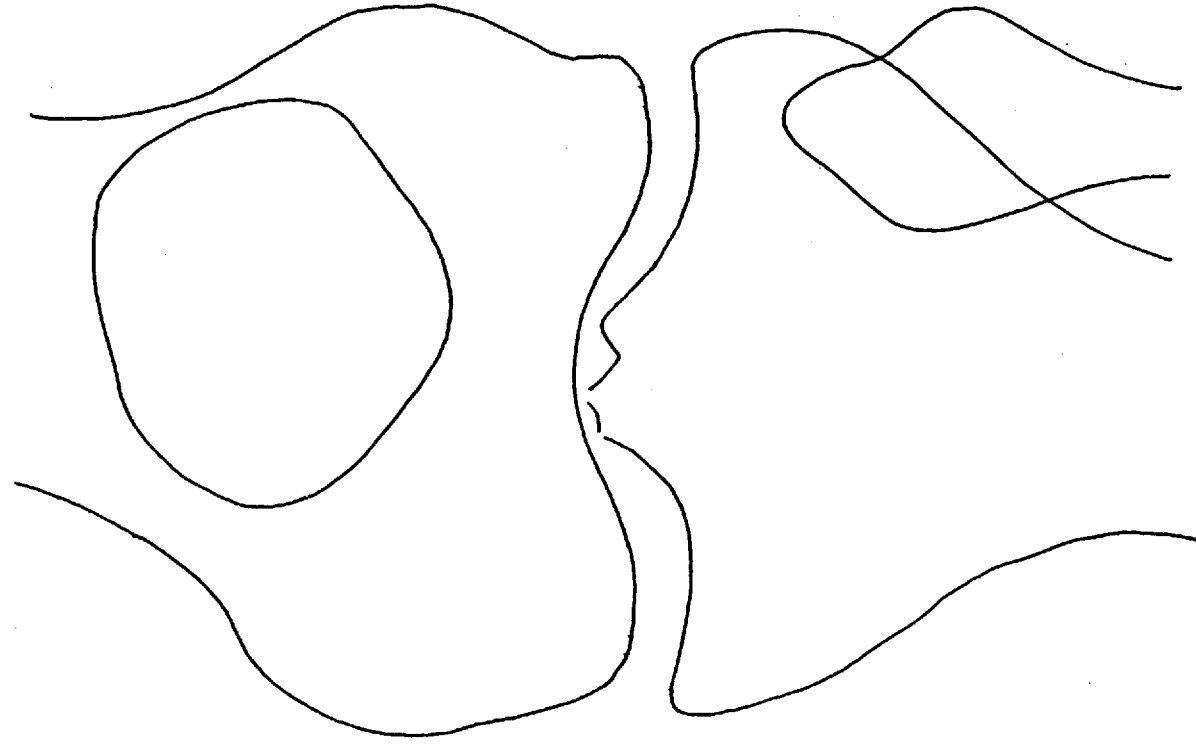

**Grade -1**

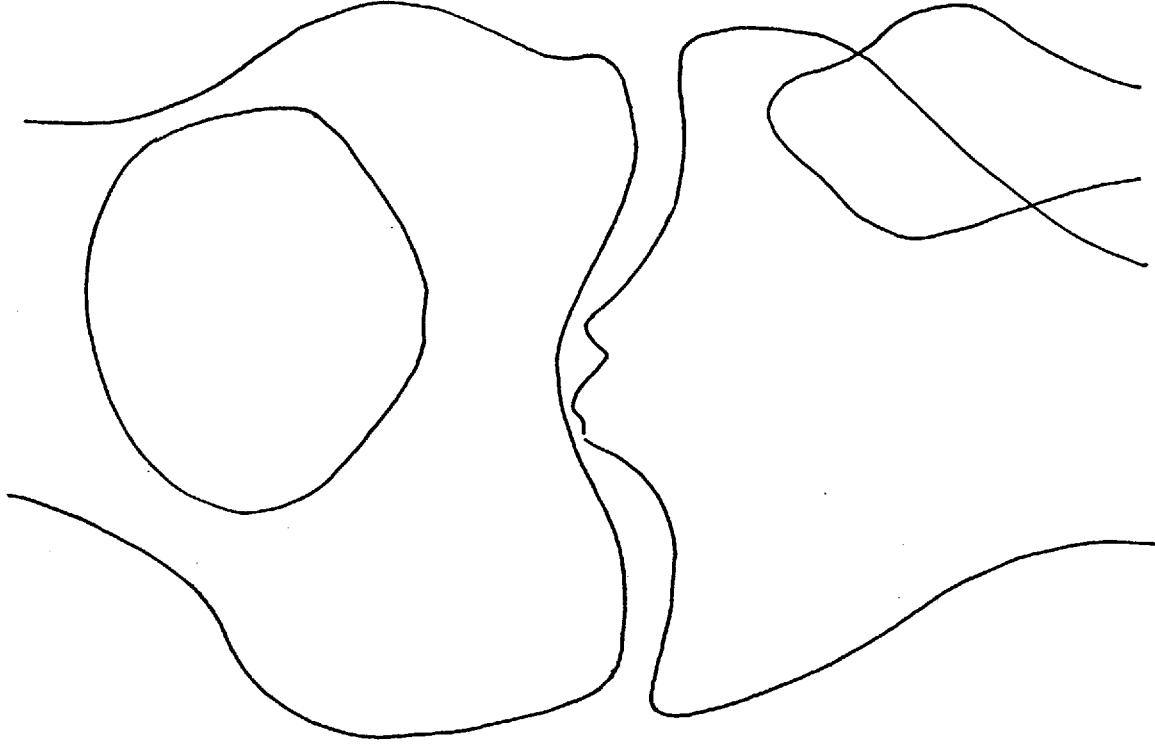

**Grade 0**

**Medial tibio-femoral joint space narrowing for men**

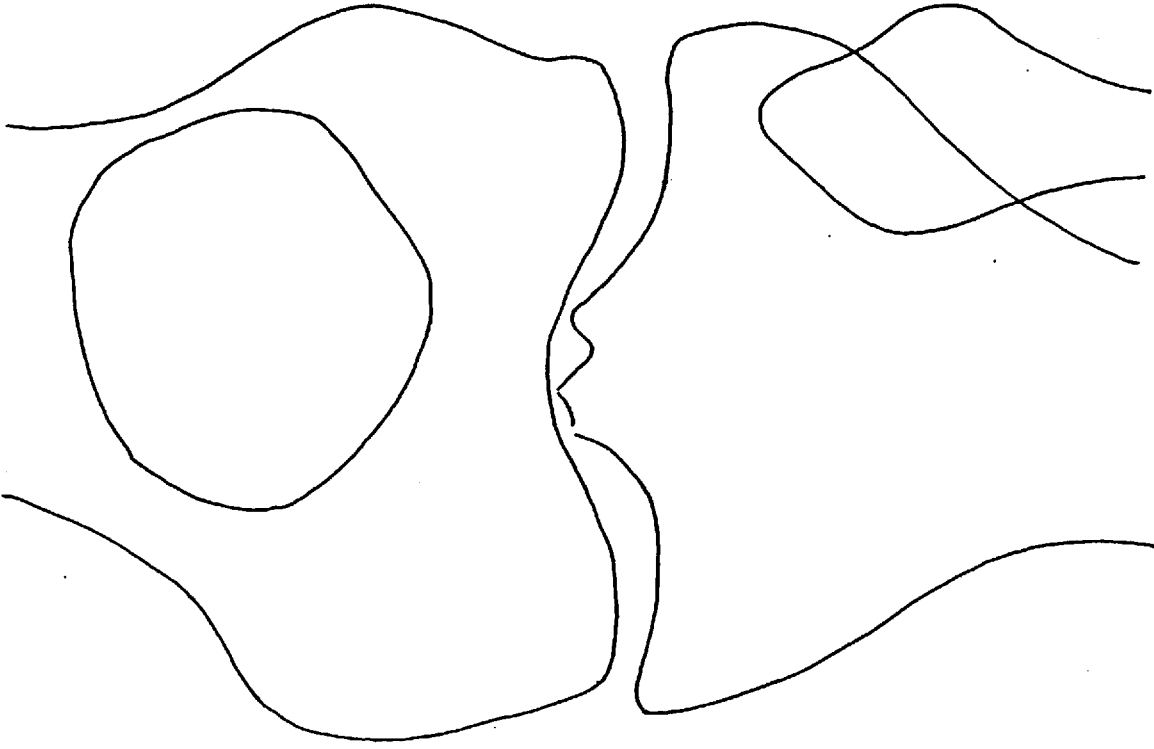

**Grade 1**

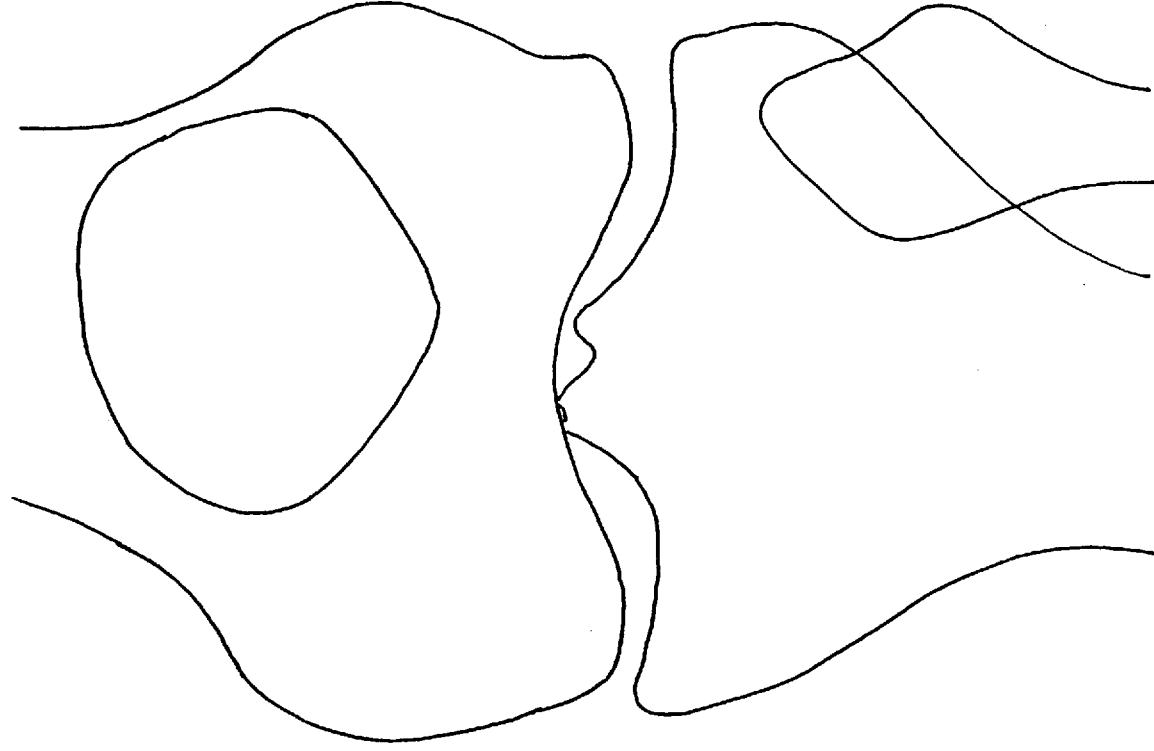

**Grade 2**



**Medial tibio-femoral joint space narrowing for men**

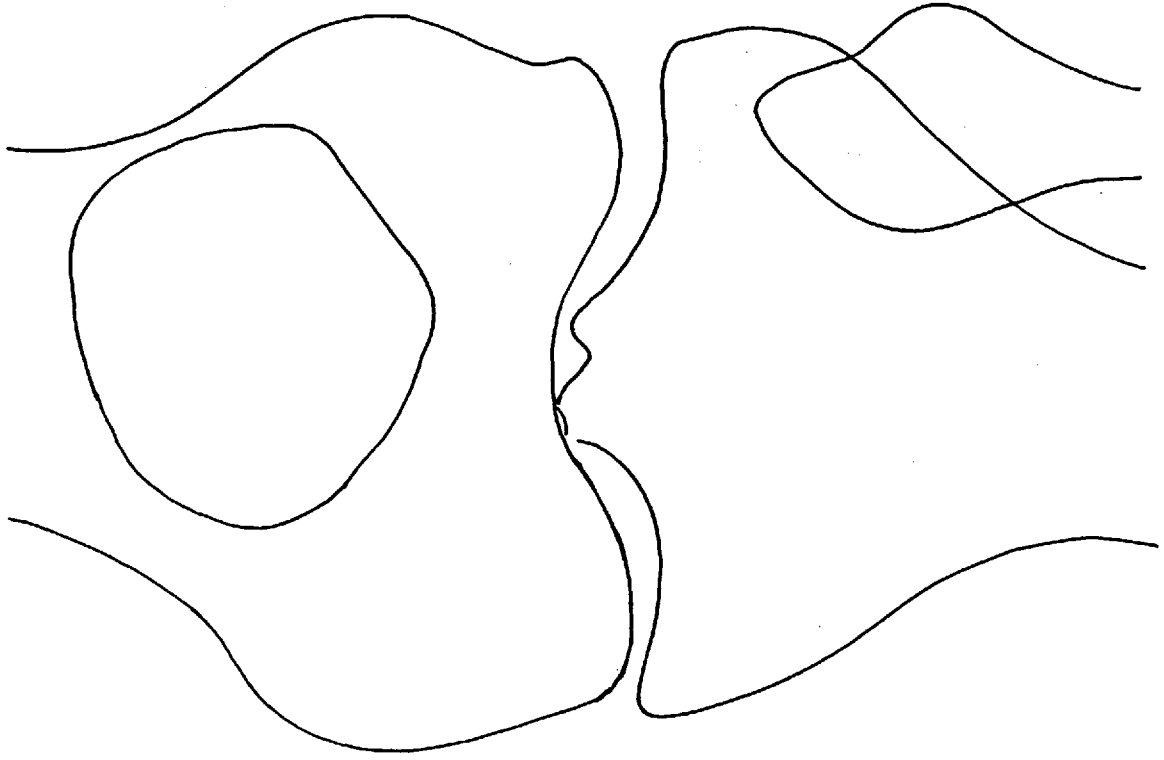

**Grade 3**

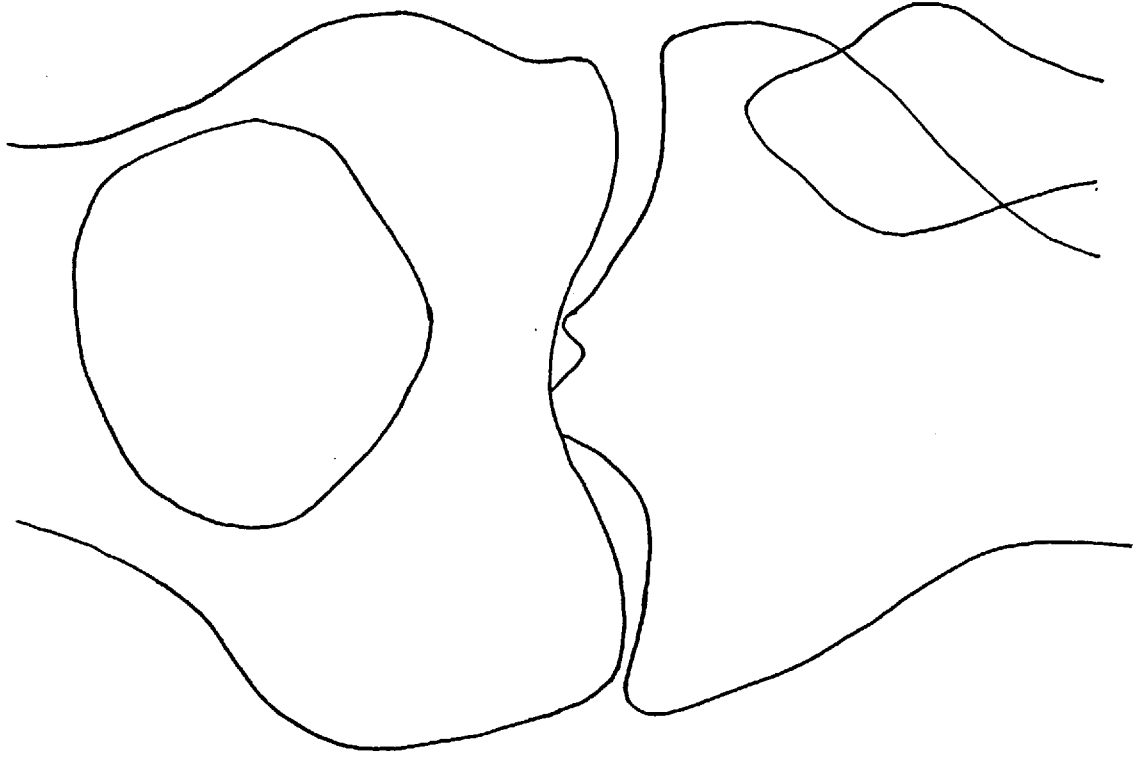

**Grade 4**

**Medial tibio-femoral joint space narrowing for men**

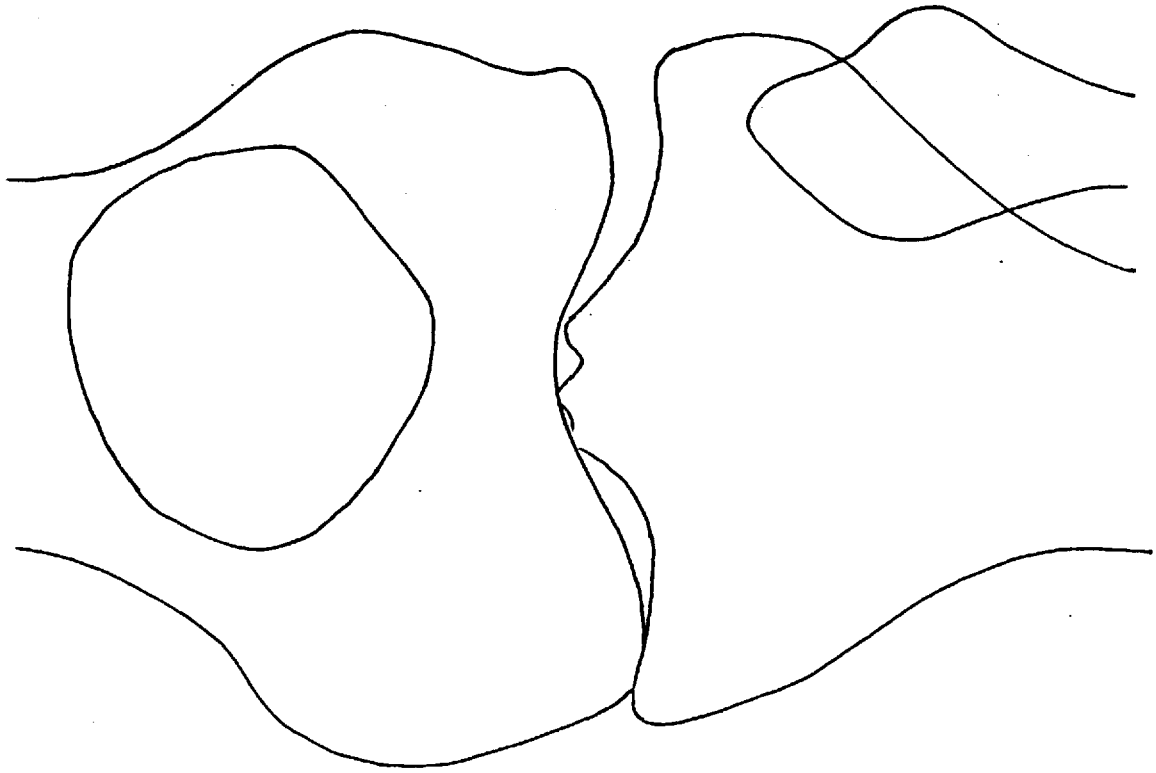

**Lateral tibio-femoral joint space narrowing for men**

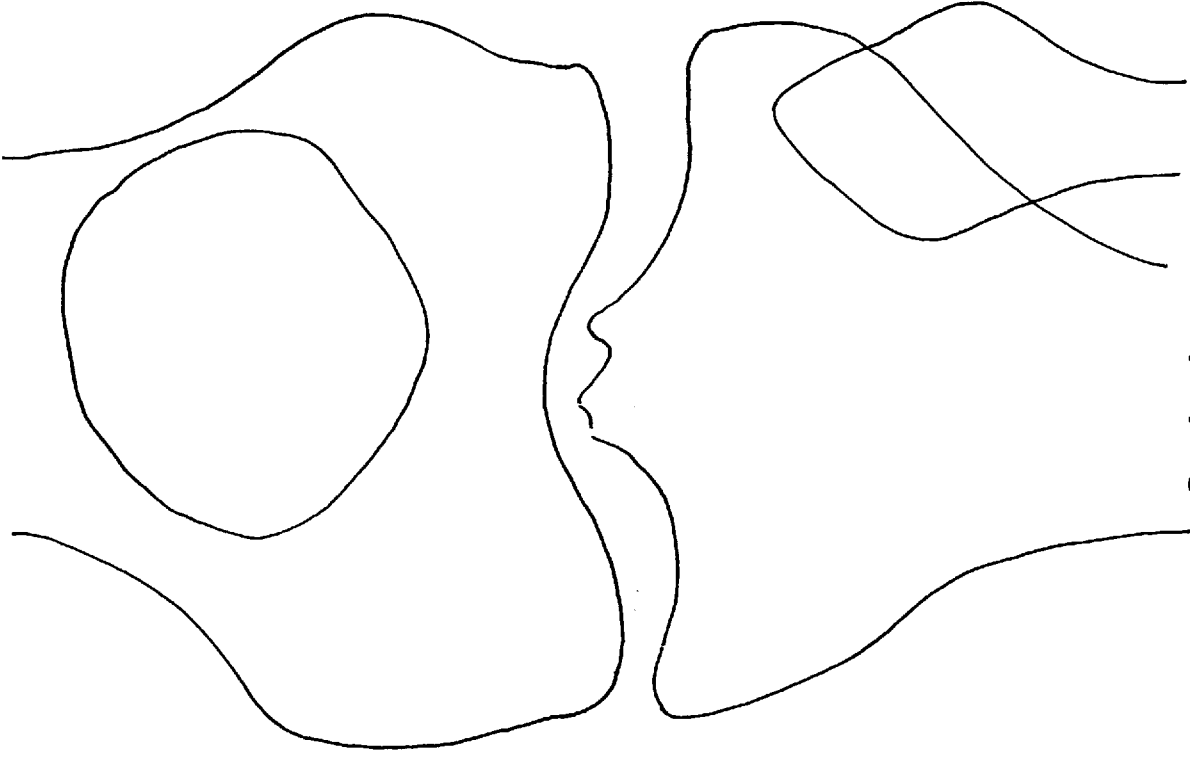

**Grade -4**

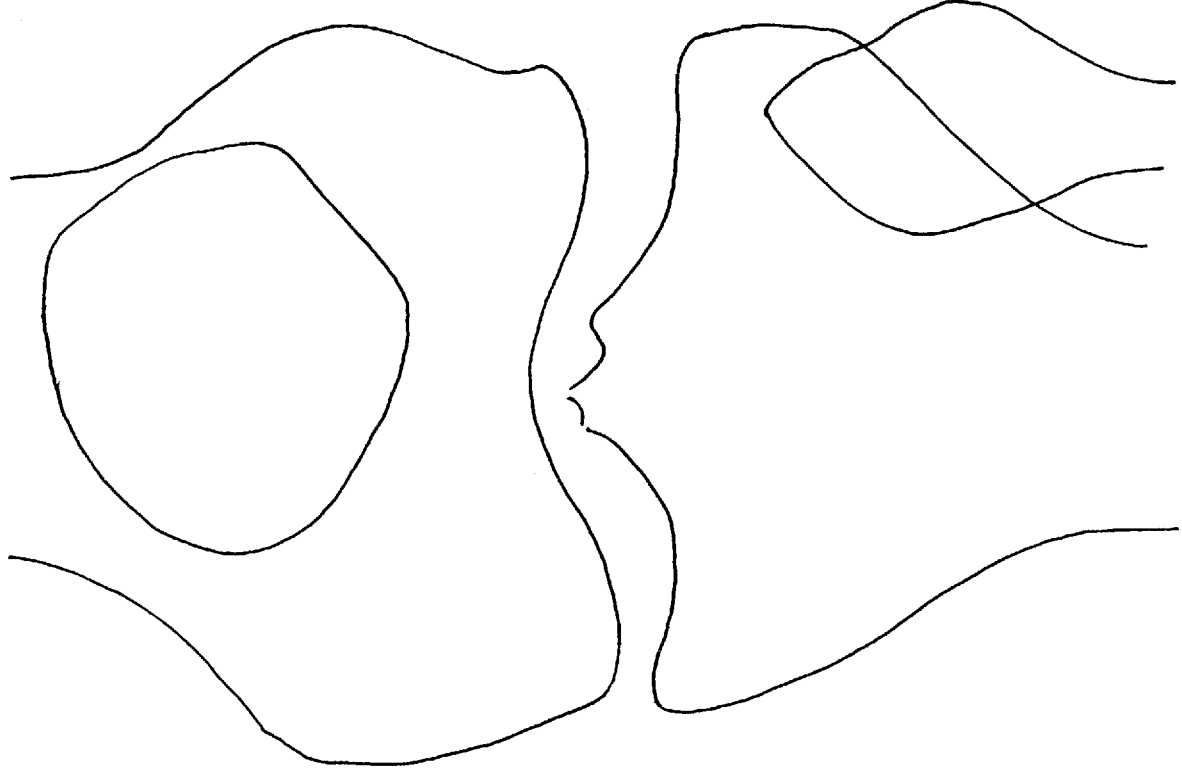

**Grade -5**

**Lateral tibio-femoral joint space narrowing for men**

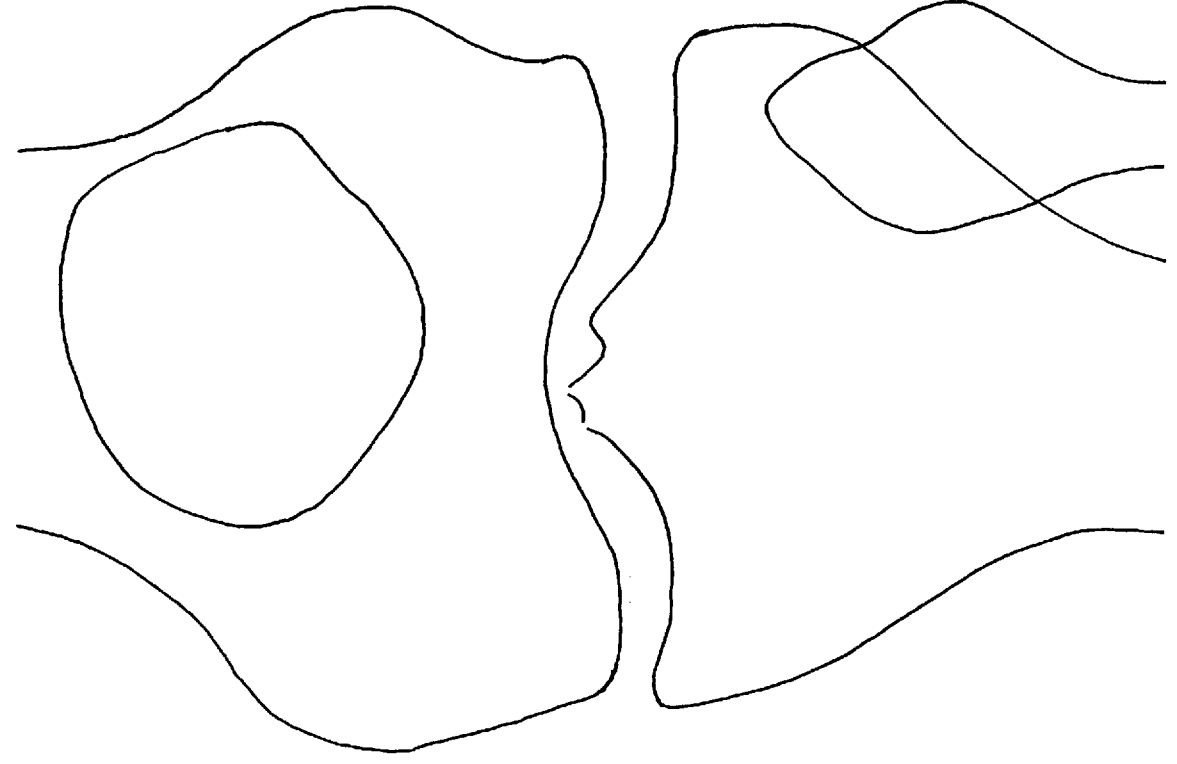

**Grade -3**

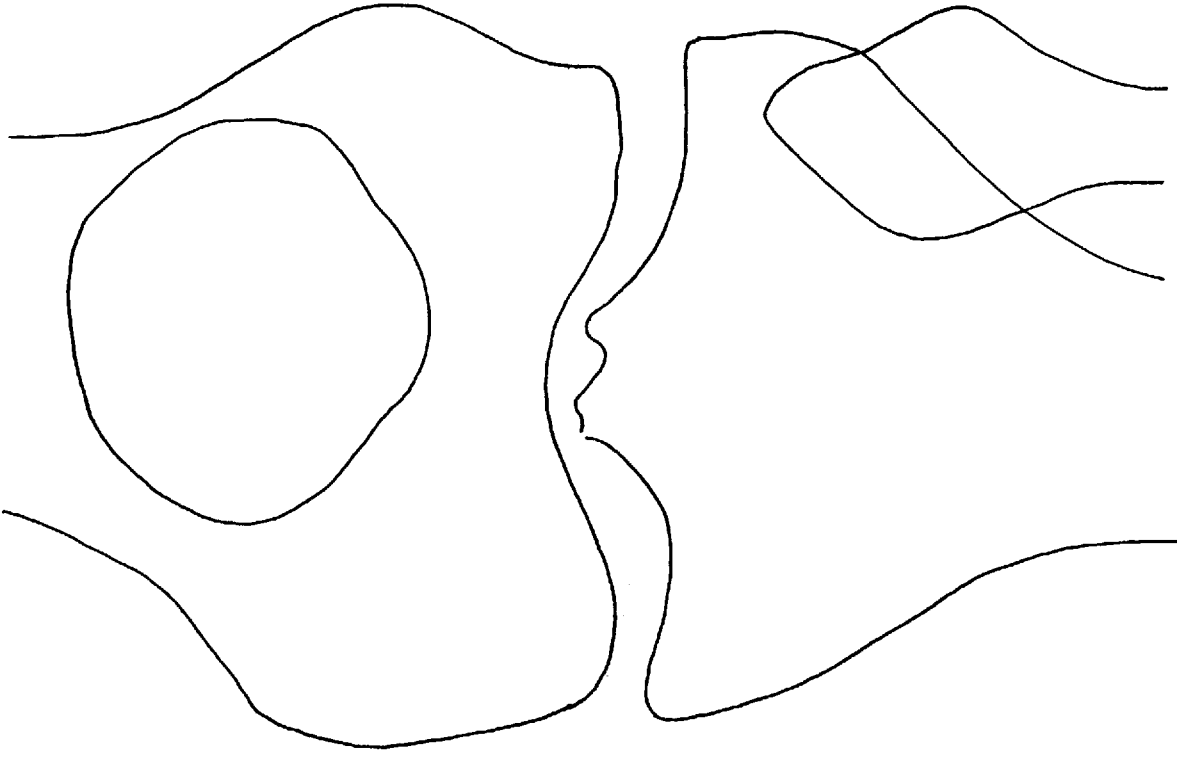

**Grade -2**

**Lateral tibio-femoral joint space narrowing for men**

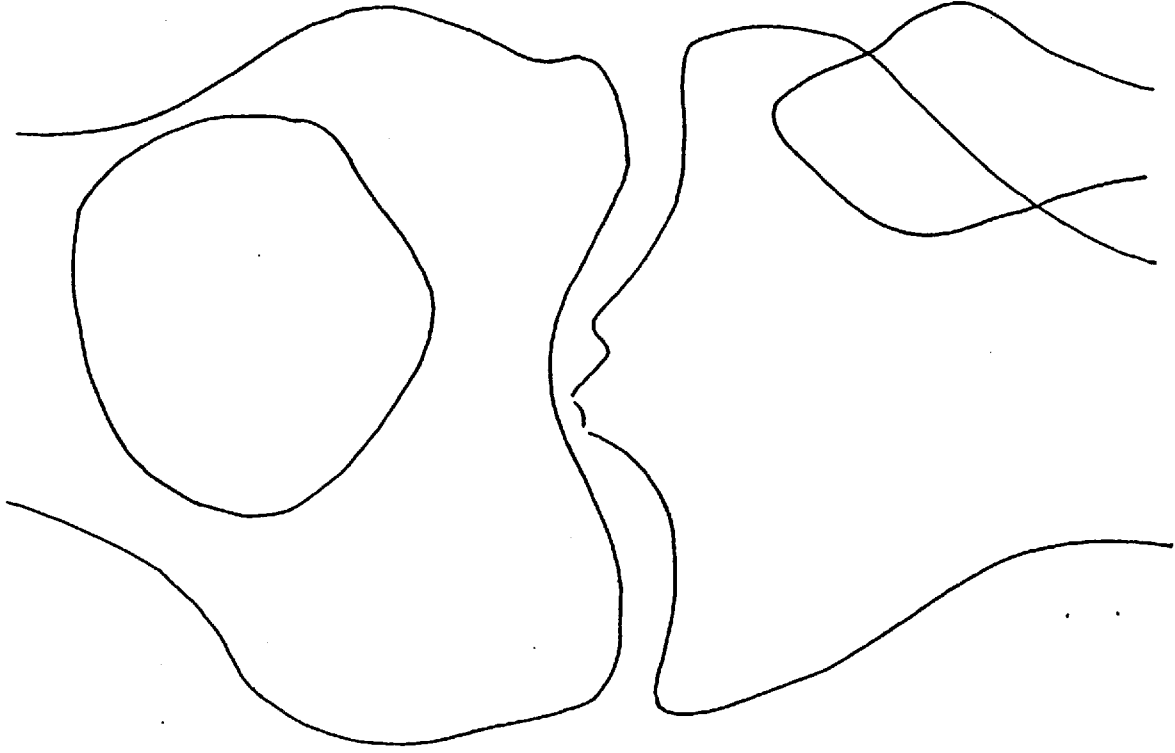

**Grade -1**

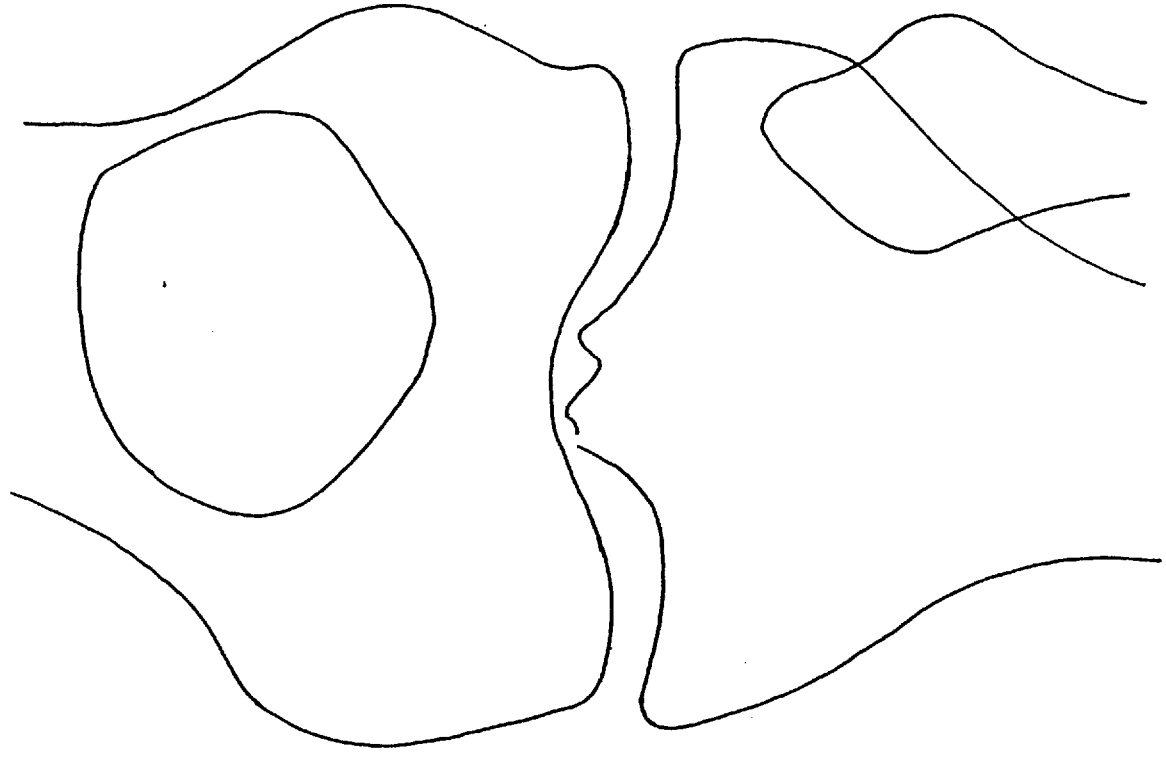

**Grade 0**

**Lateral tibio-femoral joint space narrowing for men**

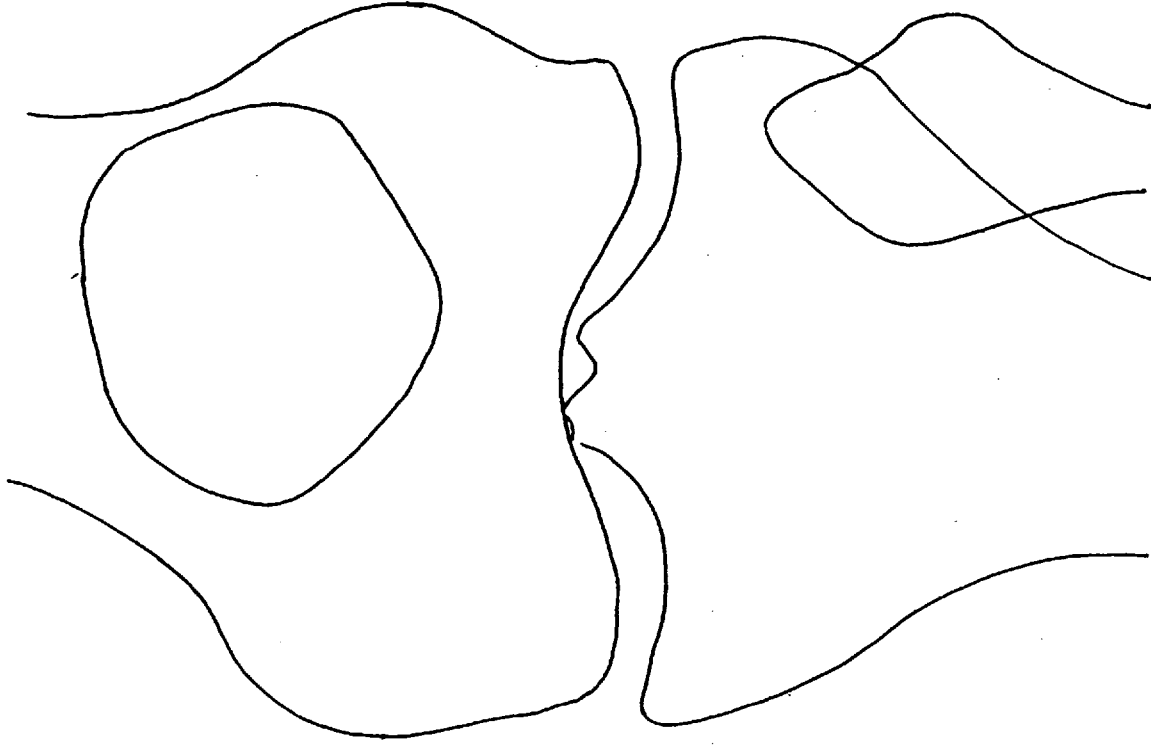

**Grade 1**

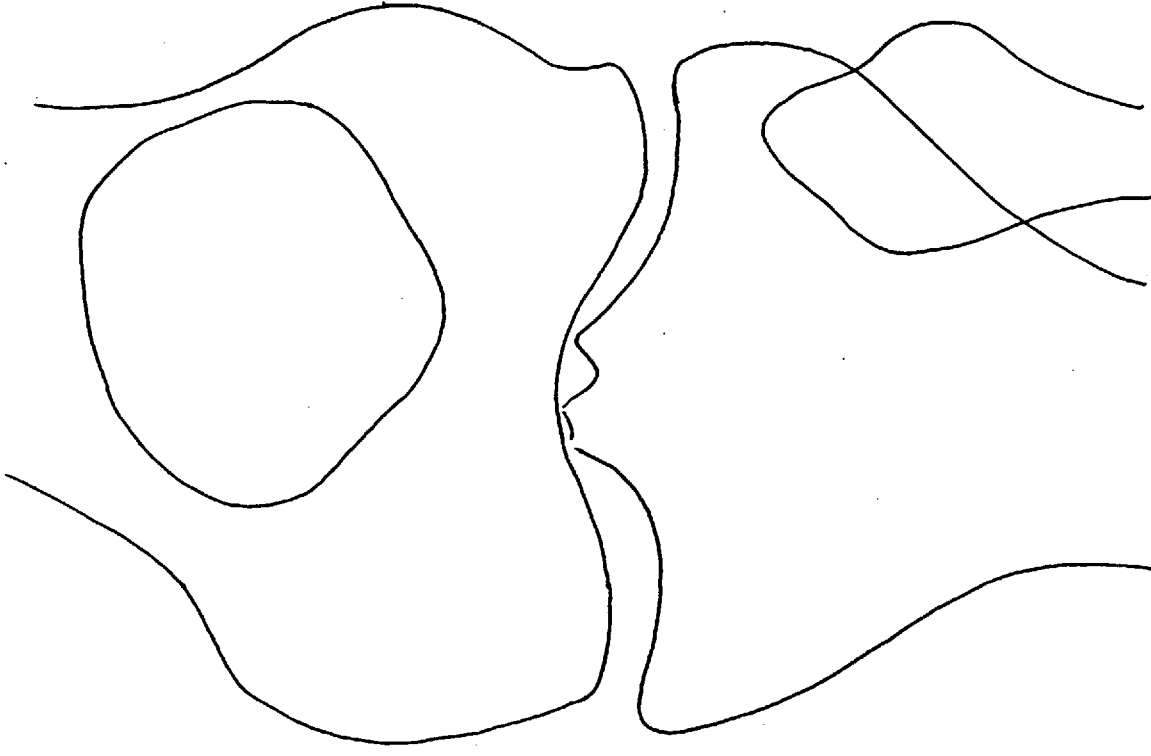

**Grade 2**

**Lateral tibio-femoral joint space narrowing for men**

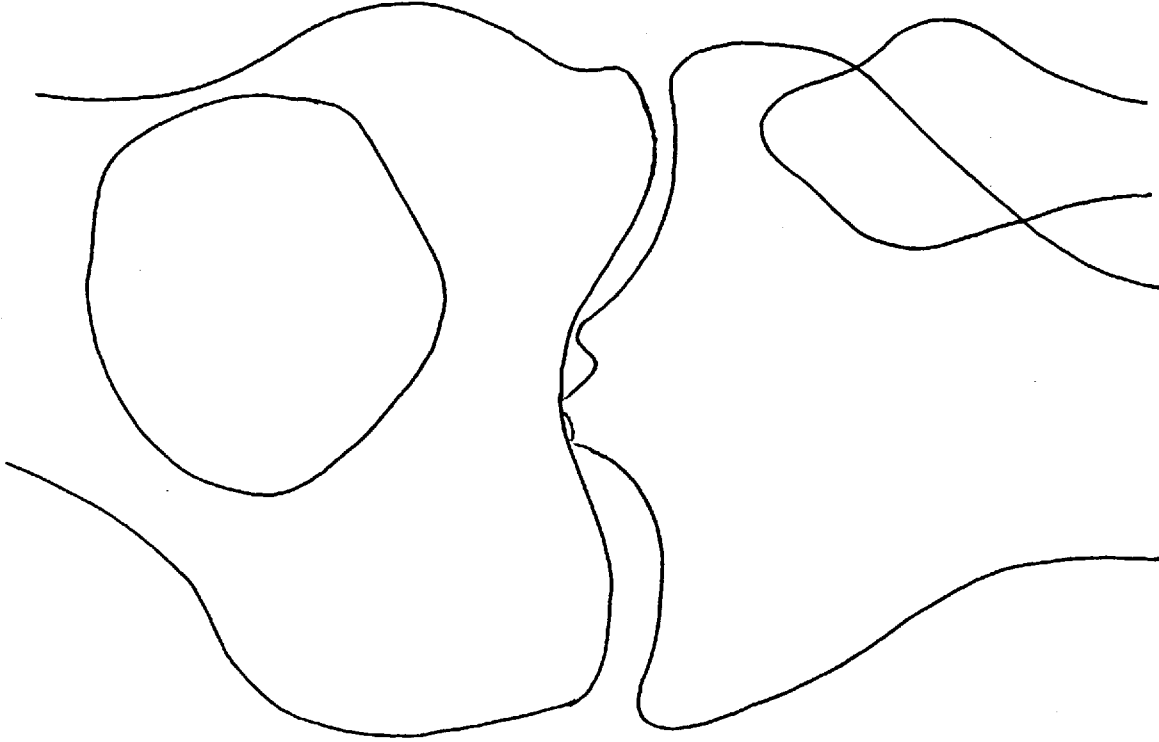

**Grade 3**

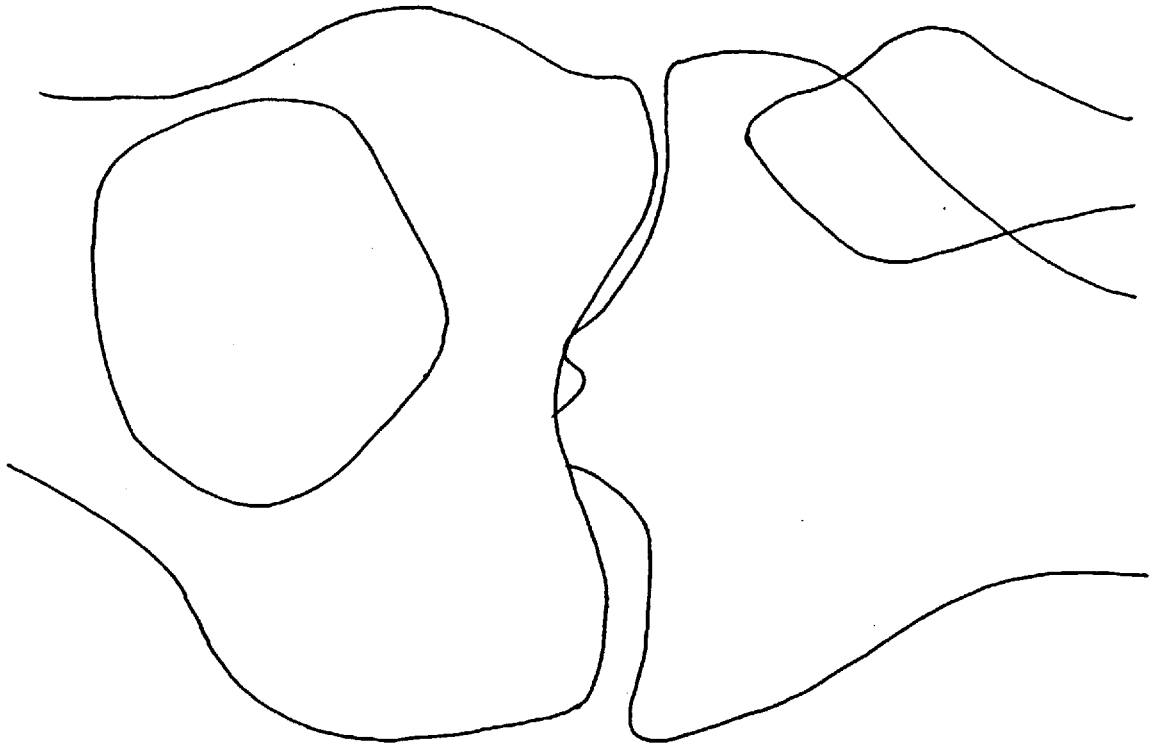

**Grade 4**

**Lateral tibio-femoral joint space narrowing for men**

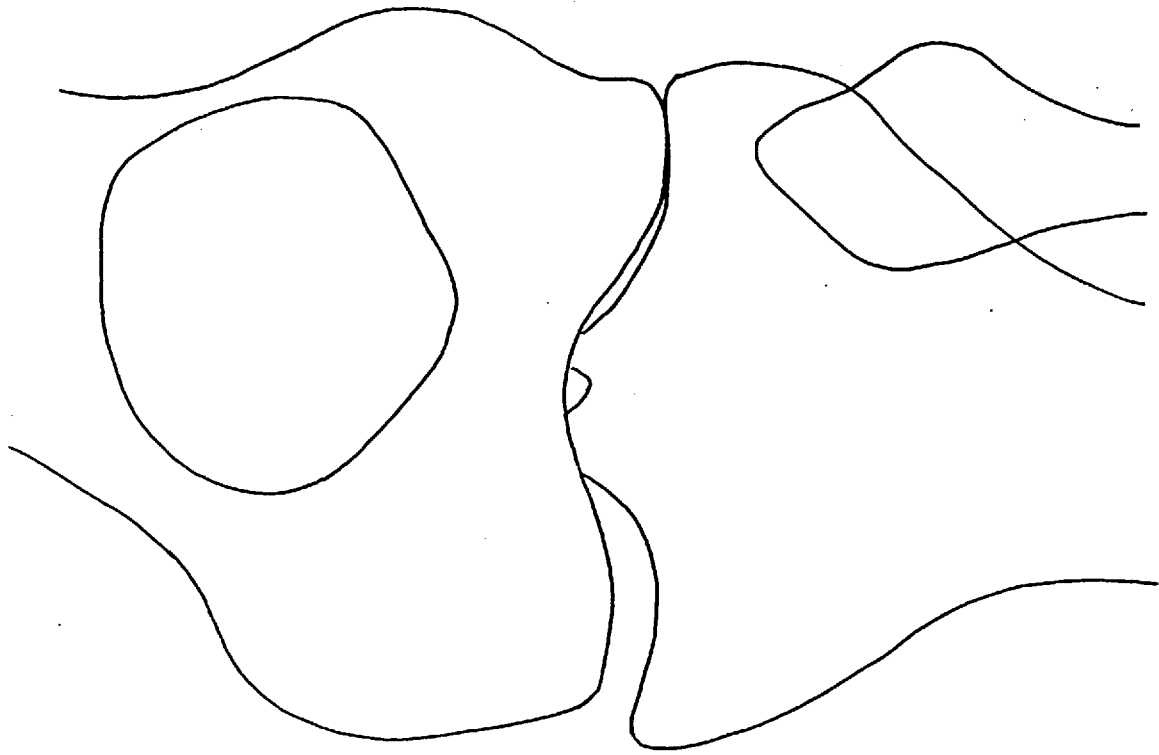

**Grade 5**



**Osteophytes in all tibio-femoral sites**

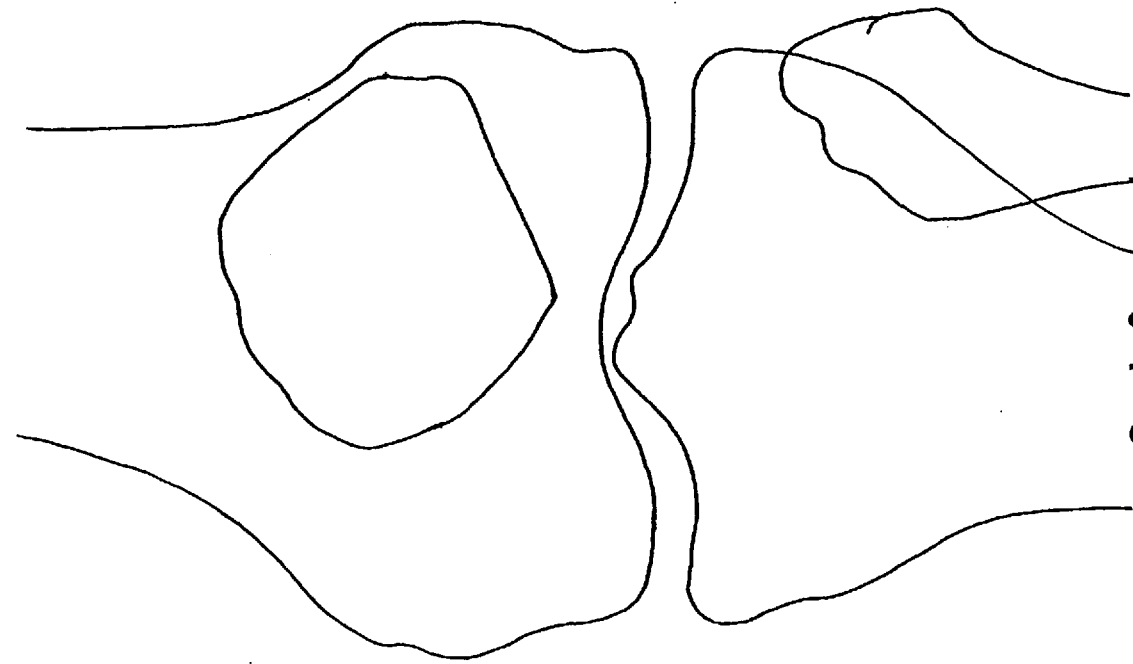

**Grade 0**

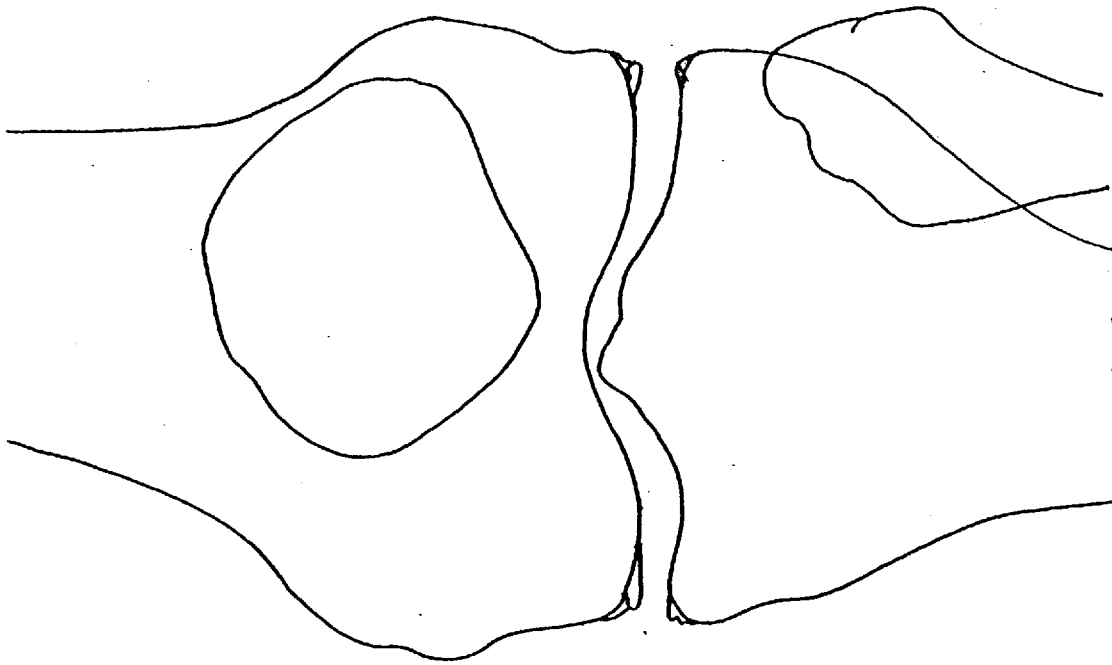

**Grade 1**

**Osteophytes in tibio-femoral sites**

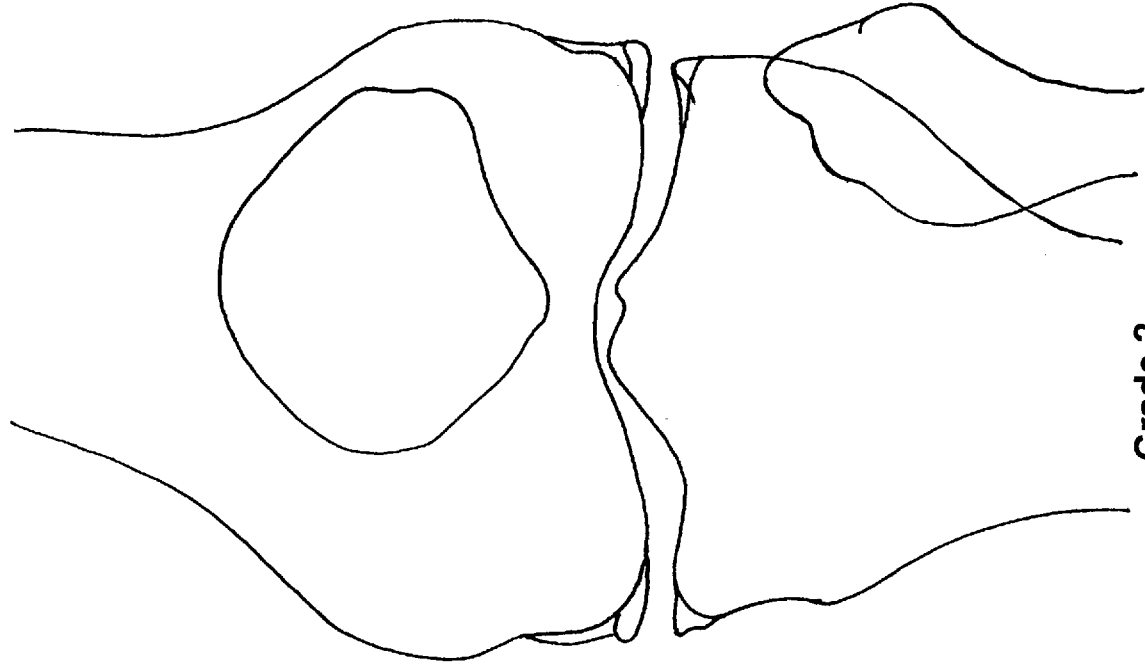

**Grade 2**

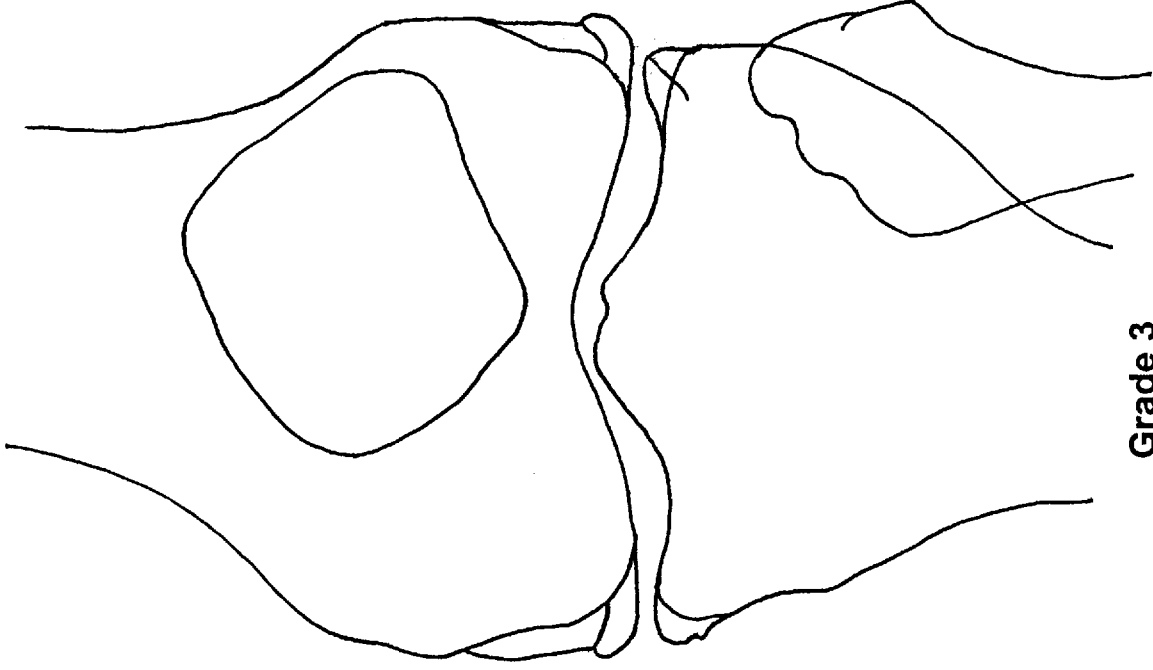

**Grade 3**

**Osteophytes in all tibio-femoral sites**

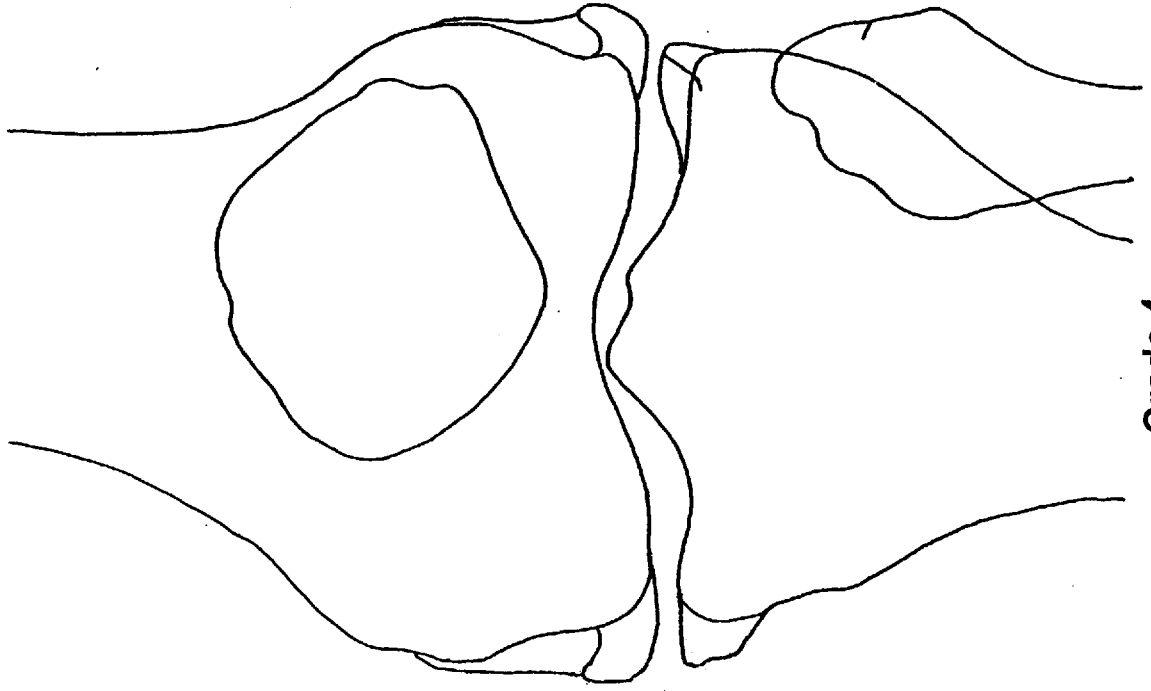

**Grade 4**

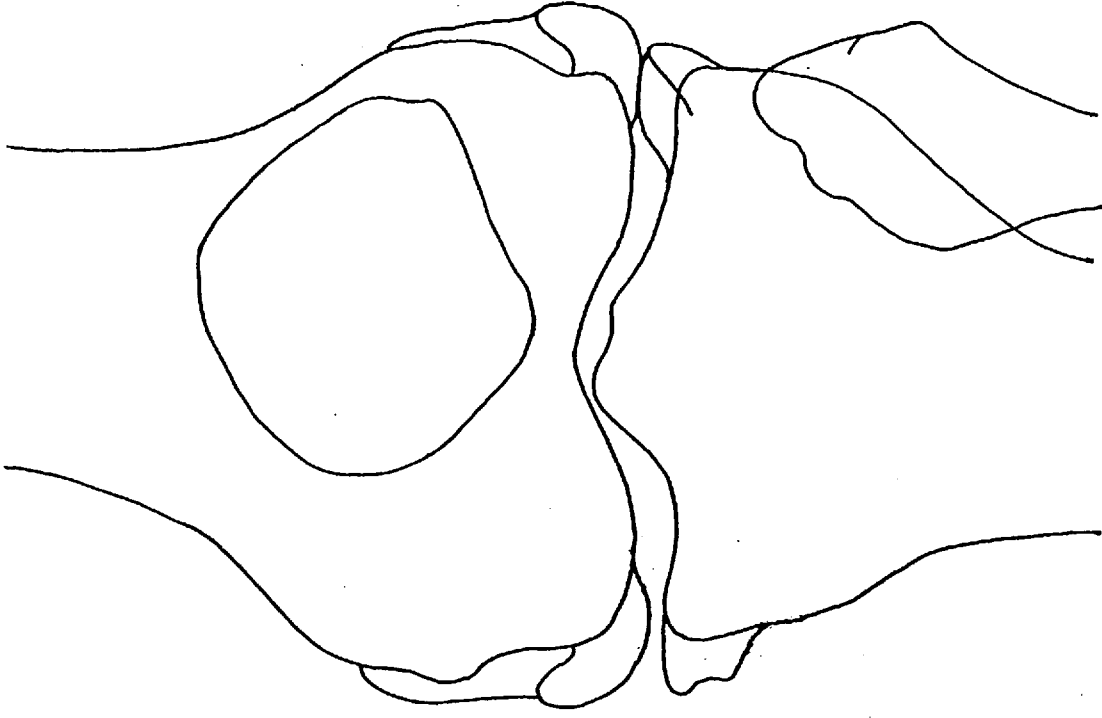

**Grade 5**

**Lateral tibial osteophyte (optional shape)**

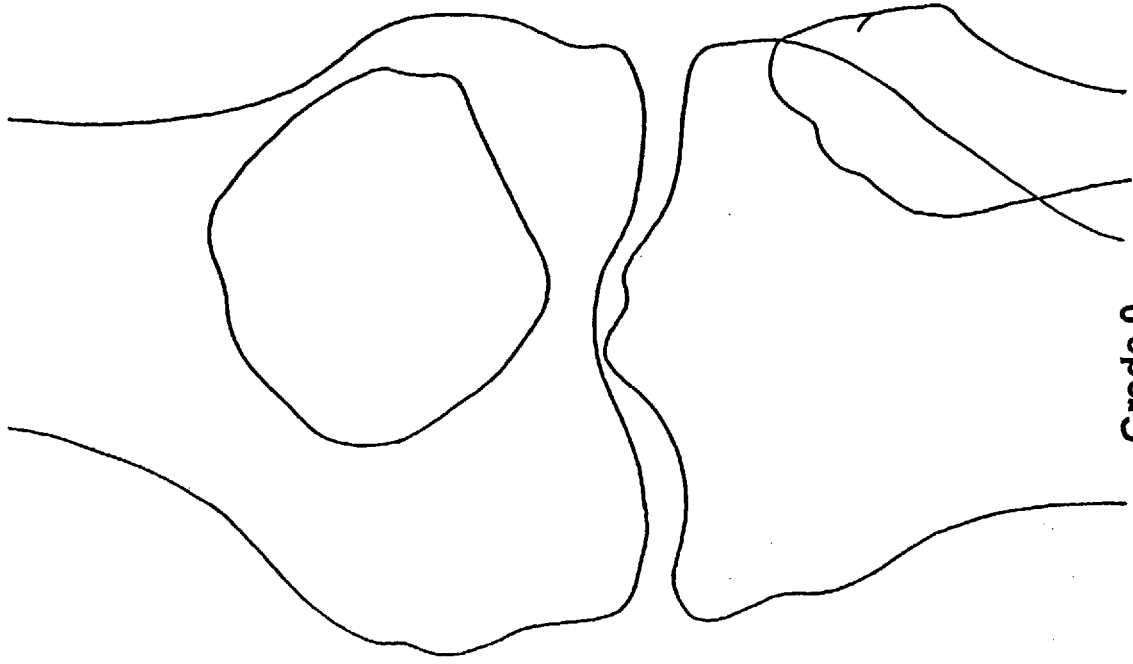

**Grade 0**

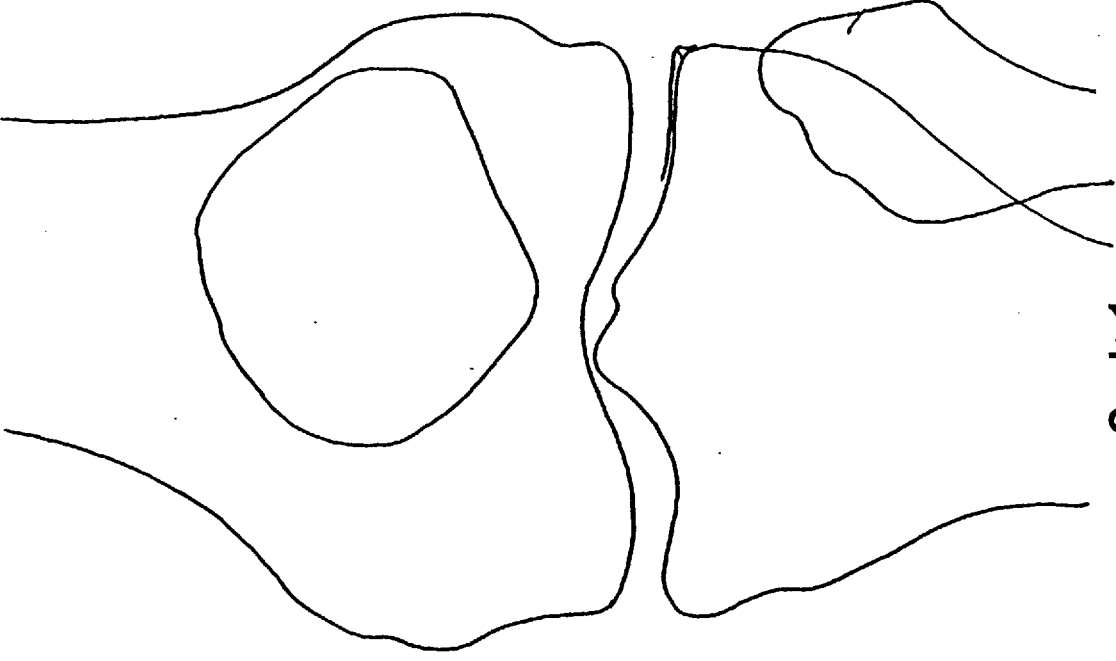

**Grade 1**

**Lateral tibial osteophyte (optional shape)**

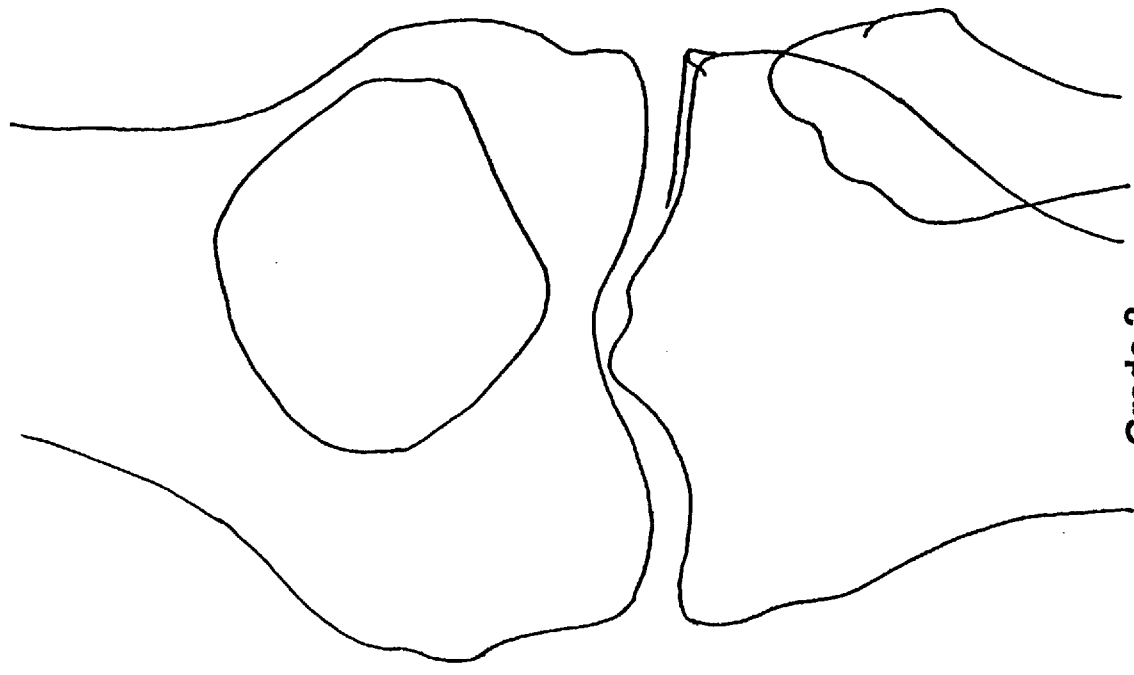

**Grade 2**

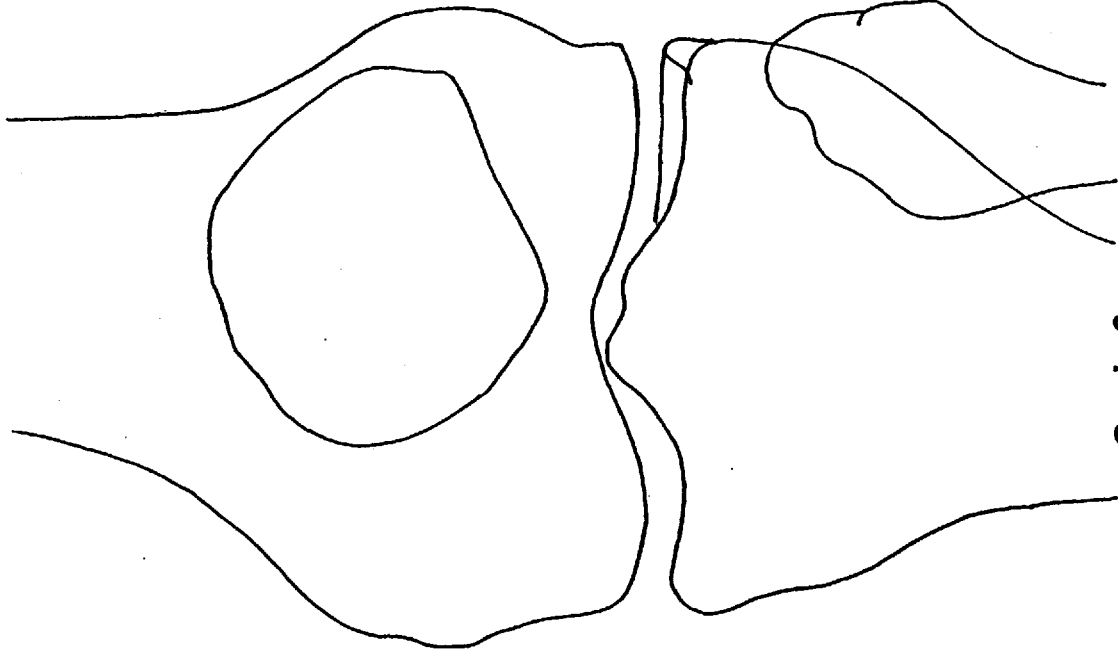

**Grade 3**

**Lateral tibial osteophyte (optional shape)**

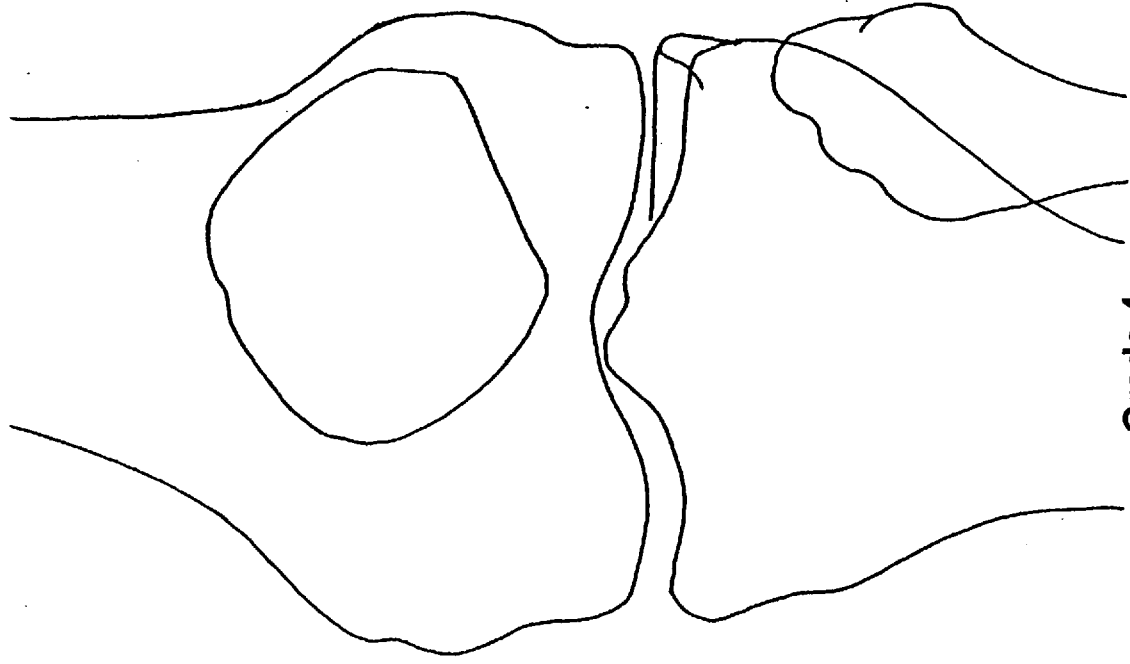

**Grade 4**

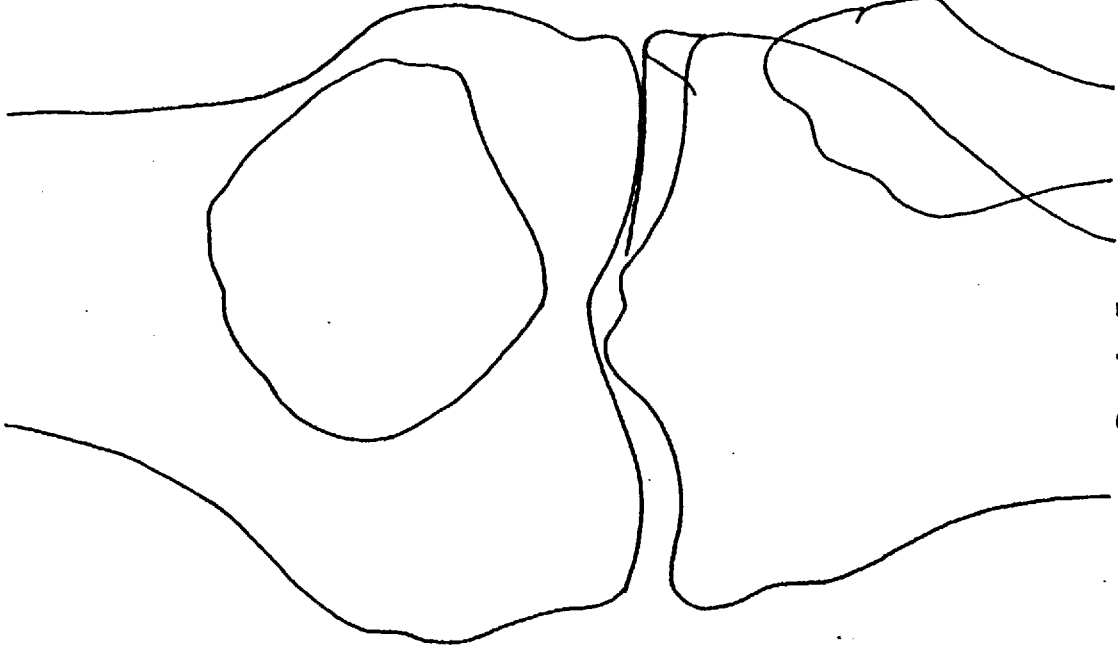

**Grade 5**

**Medial patello-femoral joint space narrowing for men**

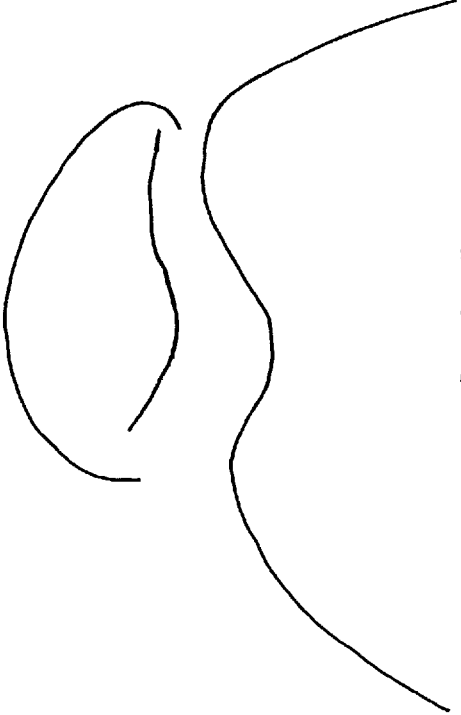

**Grade -5**

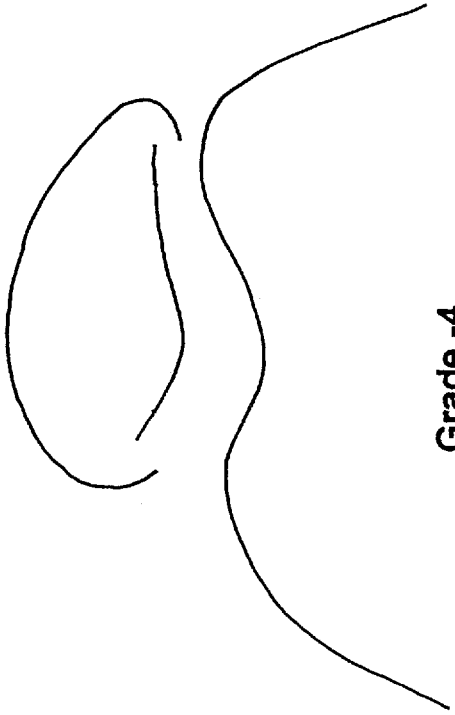

**Grade -4**

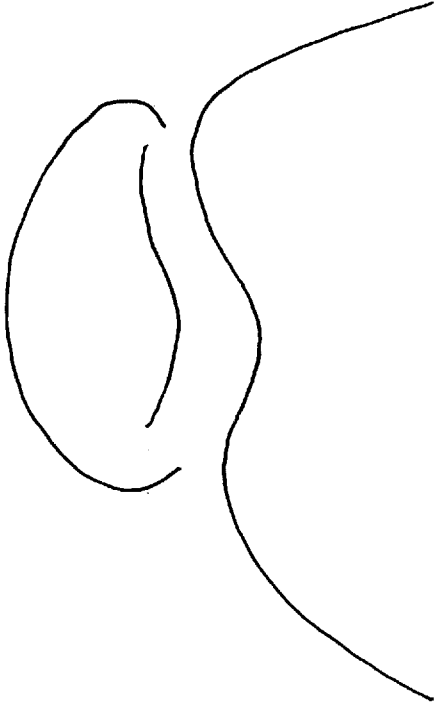

**Grade -3**

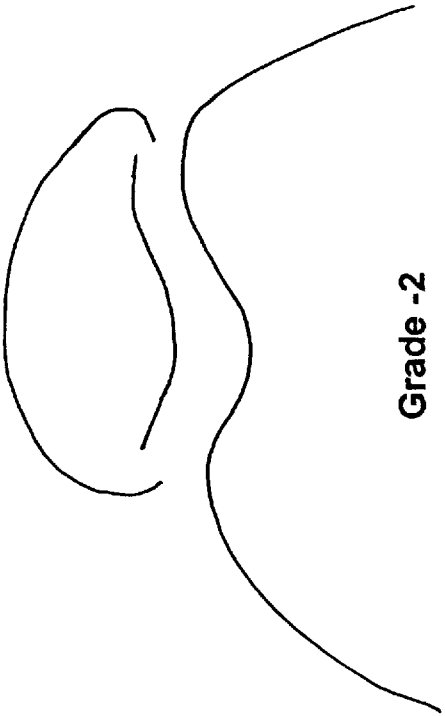

**Grade -2**

**Medial patello-femoral joint space narrowing for men**

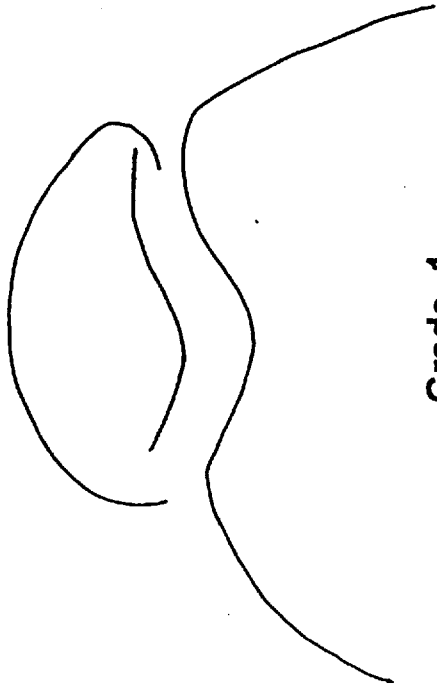

**Grade -1**

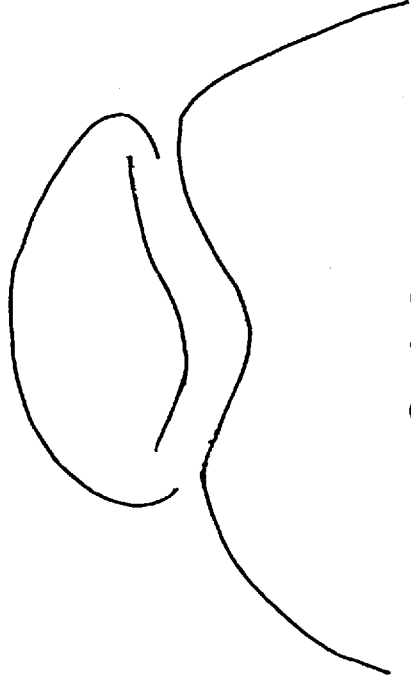

**Grade 0**

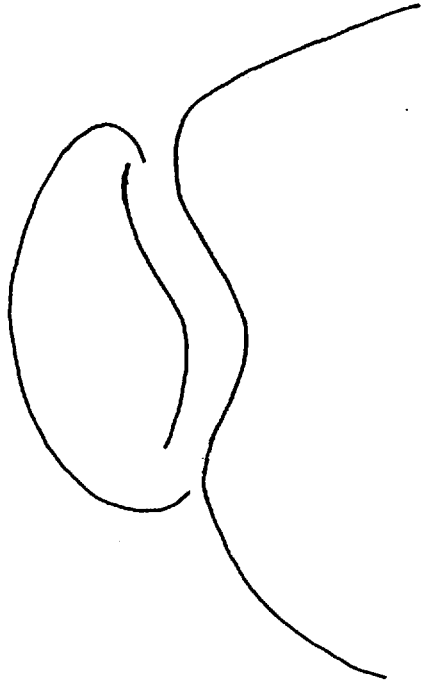

**Grade 1**

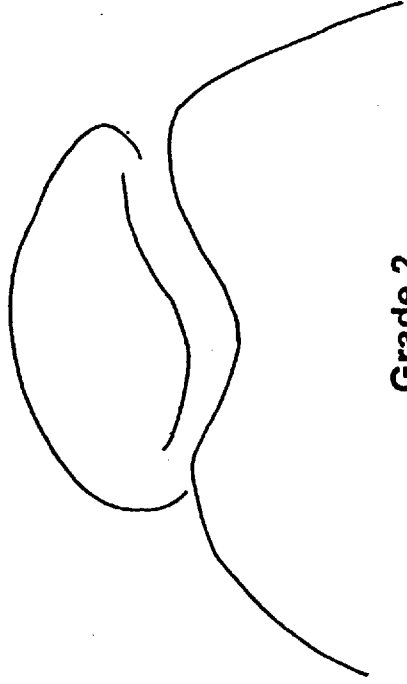

**Grade 2**



**Medial patello-femoral joint space narrowing for men**

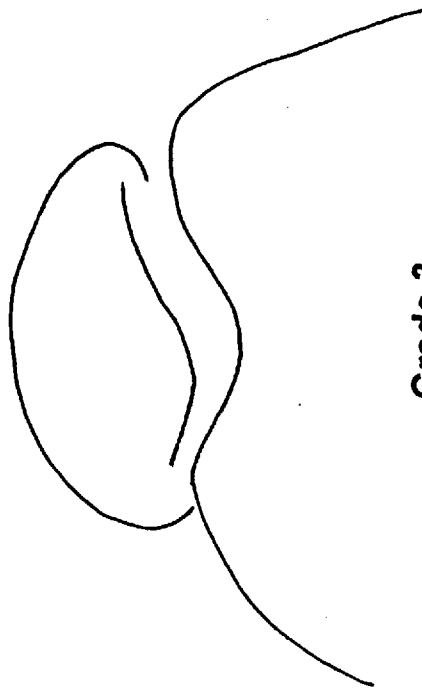

**Grade 3**

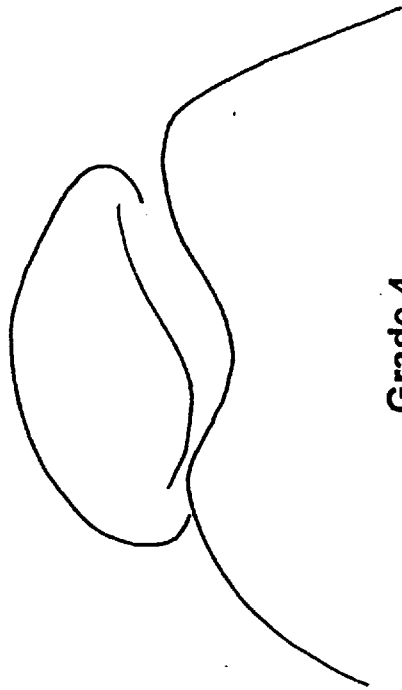

**Grade 4**

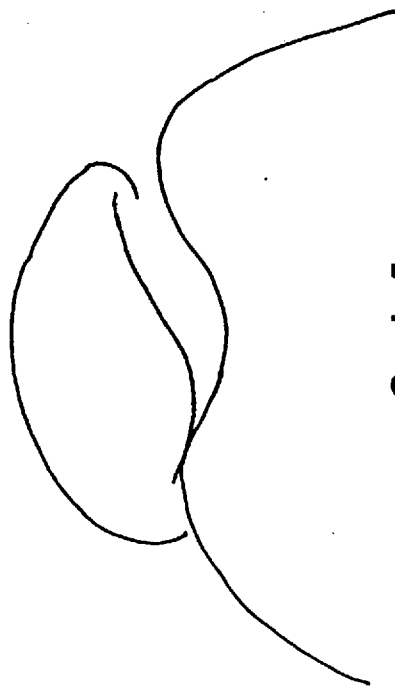

**Grade 5**

**Lateral patello-femoral joint space narrowing for men**

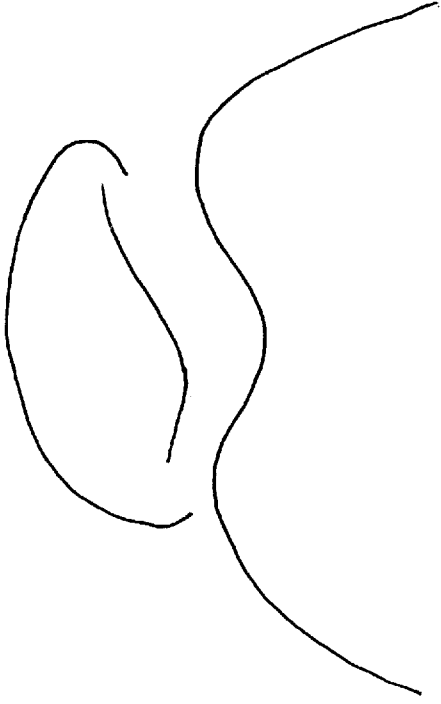

**Grade -5**

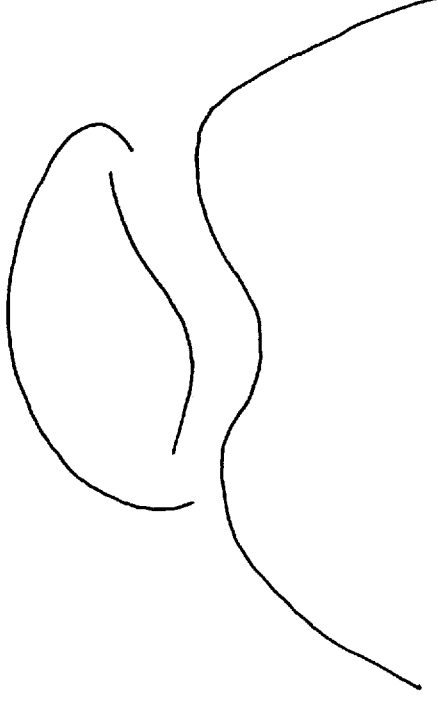

**Grade -4**

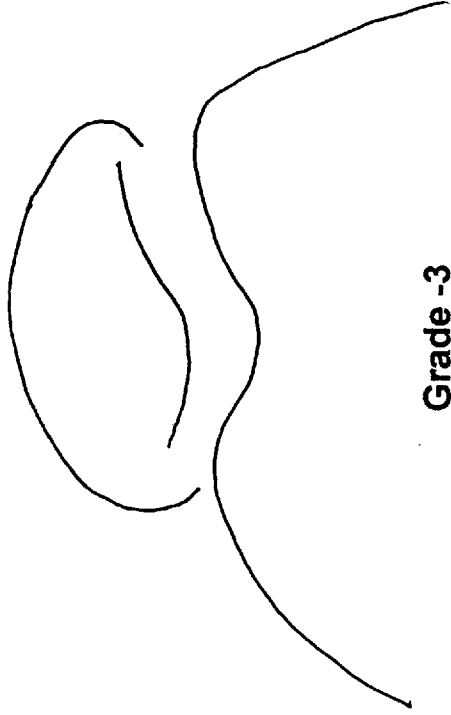

**Grade -3**

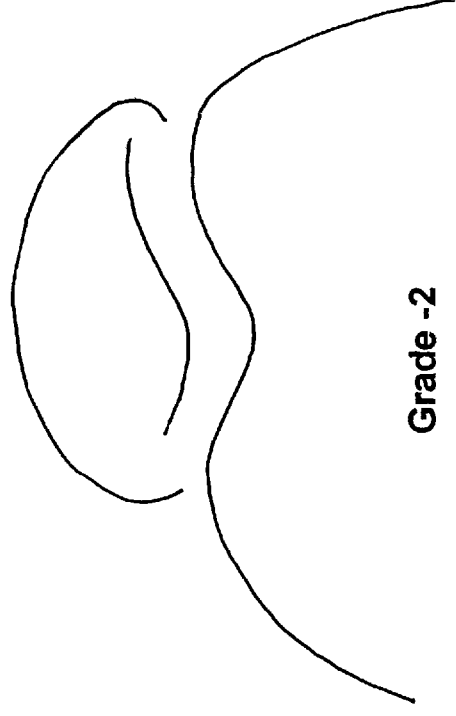

**Grade -2**

**Lateral patello-femoral joint space narrowing for men**

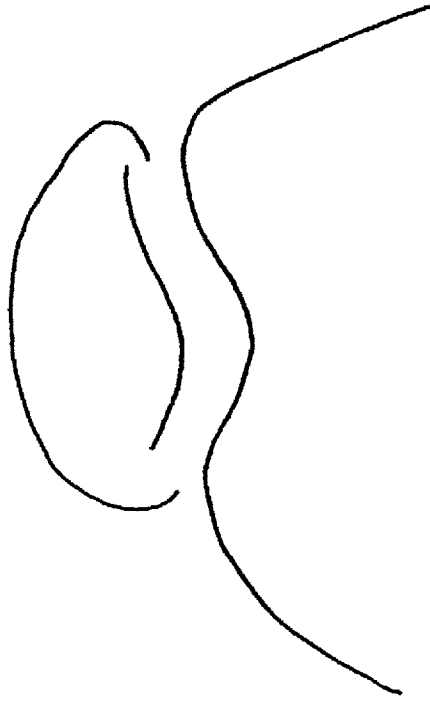

**Grade -1**

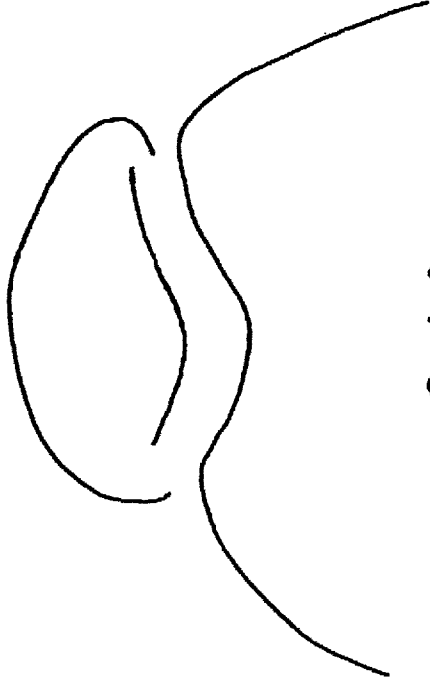

**Grade 0**

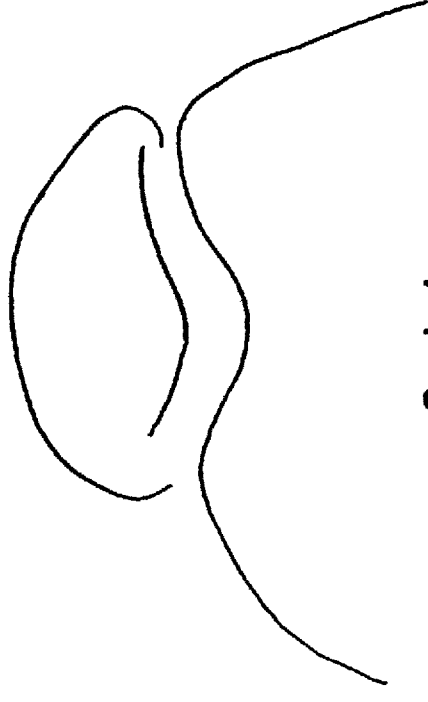

**Grade 1**

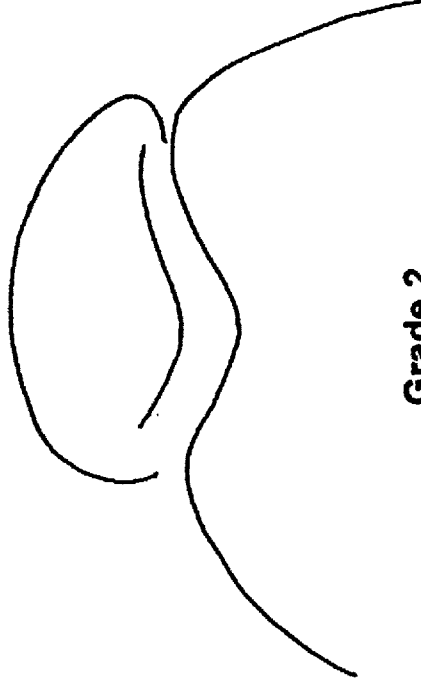

**Grade 2**

**Lateral patello-femoral joint space narrowing for men**

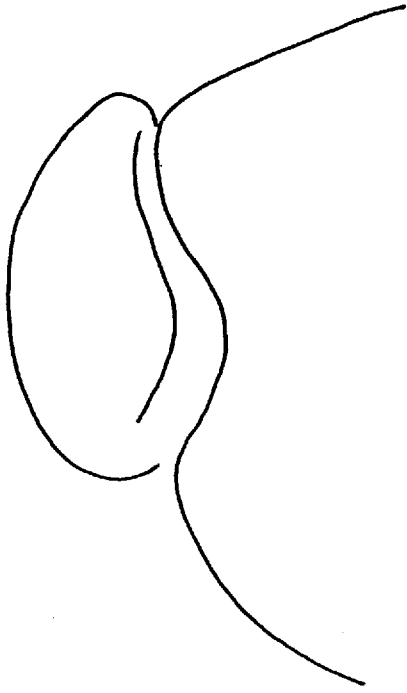

**Grade 3**

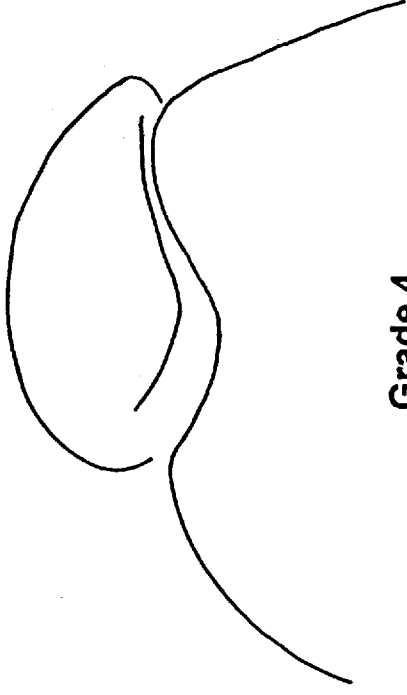

**Grade 4**

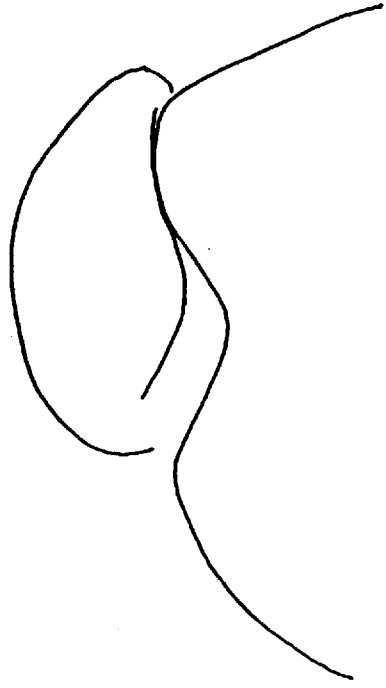

**Grade 5**

**Osteophytes in all patello-femoral sites**

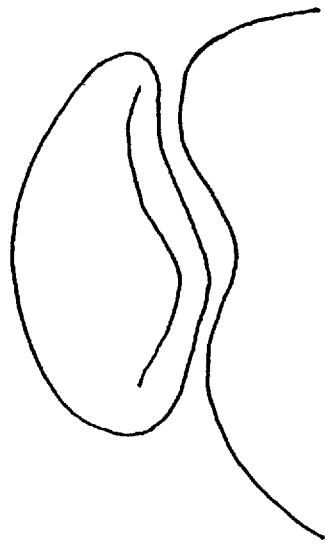

**Grade 0**

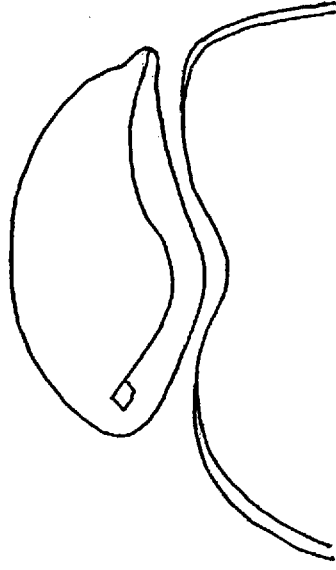

**Grade 1**

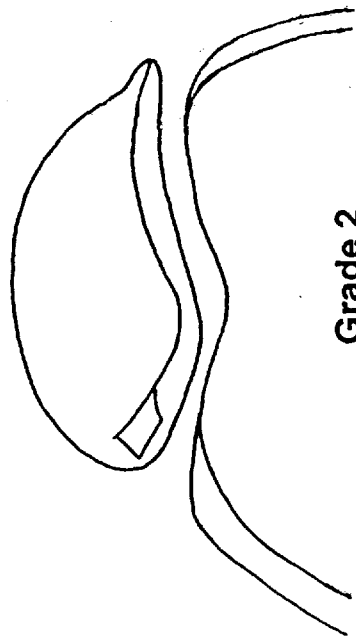

**Grade 2**

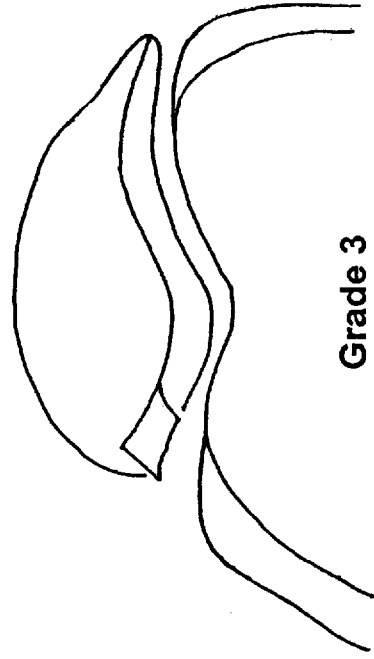

**Grade 3**

**Osteophytes in all patello-femoral sites**

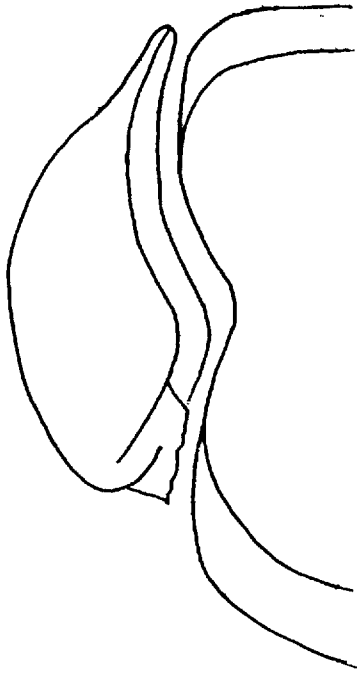

**Grade 4**

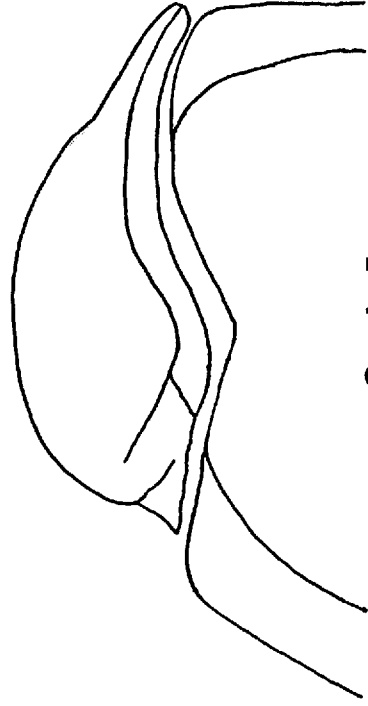

**Grade 5**

**Medial femoral trochlear osteophyte (optional shape)**

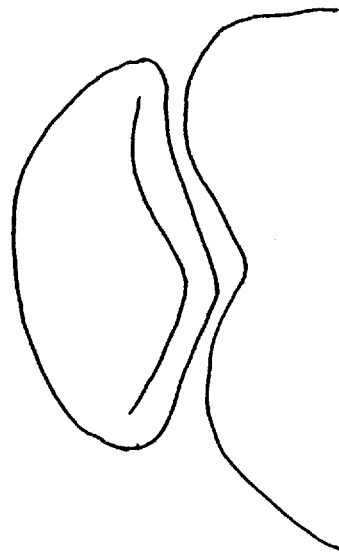

**Grade 0**

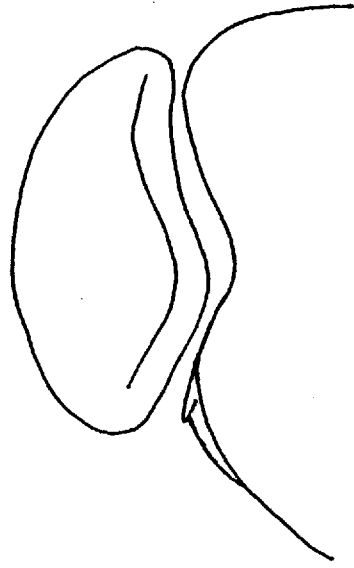

**Grade 1**

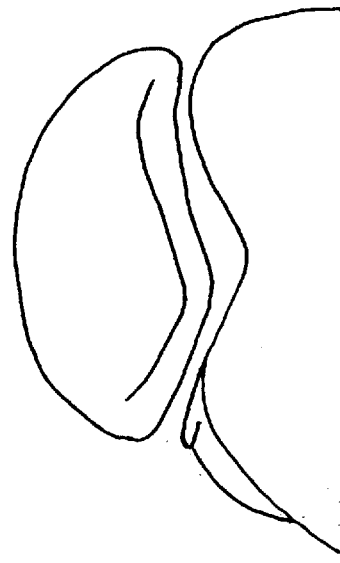

**Grade 2**

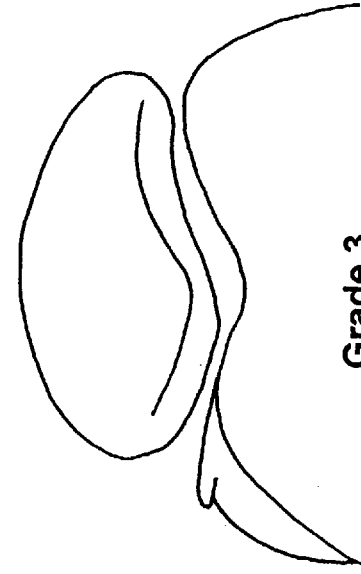

**Grade 3**

**Medial femoral trochlear osteophyte (optional shape)**

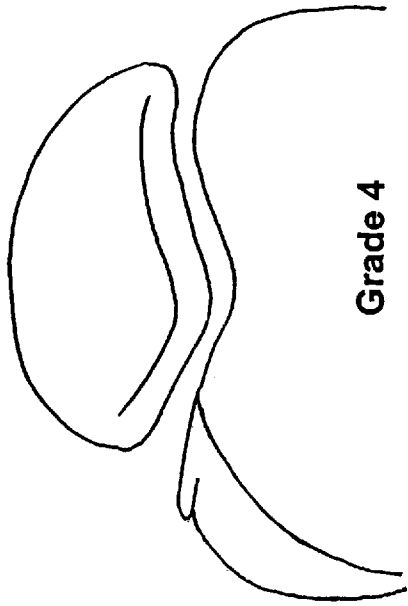

**Grade 4**

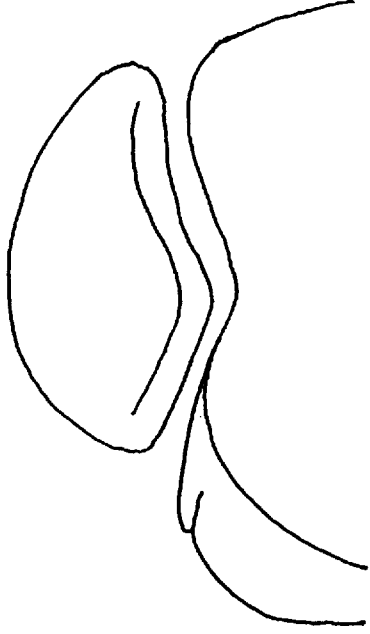

**Grade 5**
